# Supplementary material for: De novo assembly and analysis of the transcriptome of the Dermacentor marginatus genes differentially expressed after blood-feeding and long-term starvation
Source: Research Square preprint supplement (doi:10.21203/rs.3.rs-57342/v4), 2020-11-04
Supplement: Supplementary file 1 [file 33cb5d8ce0d03ae94fd04c5d.xlsx]

## Sheet: Sheet1
Supplementary Table 2 Overview of sequencing quality control
Sample	Raw_Reads	Raw_Bases	Valid_Reads	Valid_Bases	Valid%	Q20%	Q30%	GC%
H_tick1	48512244	7.28G	46912662	6.54G	96.7	97.93	93.68	49.8
H_tick2	52529448	7.88G	50242374	7.00G	95.65	97.91	93.68	50.69
H_tick3	57129582	8.57G	55155938	7.69G	96.55	97.95	93.73	50.29
F_tick1	53726174	8.06G	53012248	7.87G	98.67	98.08	93.99	52.27
F_tick2	46787938	7.02G	46197036	6.85G	98.74	98.06	93.97	51.84
F_tick3	45045974	6.76G	44496928	6.60G	98.78	98.04	93.89	51.48
M_tick1	54089356	8.11G	52978266	7.83G	97.95	97.54	92.78	48.44
M_tick2	49421198	7.41G	48376992	7.15G	97.89	97.5	92.74	48.05
M_tick3	52929500	7.94G	51976602	7.69G	98.2	97.44	92.54	49.33
Mean	5.11302e+07		4.99277e+07		97.6811	97.8278	93.4444	50.2433
