# Supplementary material for: De novo assembly and analysis of the transcriptome of the Dermacentor marginatus genes differentially expressed after blood-feeding and long-term starvation
Source: Research Square preprint supplement (doi:10.21203/rs.3.rs-57342/v4), 2020-11-04
Supplement: Supplementary file 2 [file 9a10d0f4d530d59281a7459e.xlsx]

## Sheet: Sheet1
Supplementary Table 6 Unigenes used in molecular function, cellular component and biological process anaylisis by GO annotation
Query	GO_hit	GO_identity	GO_evalue	Gene	Symbol	GO_ID	GO_Term	GO_Function	GO_Level
TRINITY_DN10216_c0_g1	WB|WBGene00004487	100	1.2e-85	178408	rps-18	GO:0003676	nucleic acid binding	molecular_function	5
TRINITY_DN10216_c0_g1	WB|WBGene00004487	100	1.2e-85	178408	rps-18	GO:0003723	RNA binding	molecular_function	6
TRINITY_DN10216_c0_g1	WB|WBGene00004487	100	1.2e-85	178408	rps-18	GO:0003735	structural constituent of ribosome	molecular_function	4
TRINITY_DN10216_c0_g1	WB|WBGene00004487	100	1.2e-85	178408	rps-18	GO:0005622	intracellular	cellular_component	4
TRINITY_DN10216_c0_g1	WB|WBGene00004487	100	1.2e-85	178408	rps-18	GO:0005829	cytosol	cellular_component	6
TRINITY_DN10216_c0_g1	WB|WBGene00004487	100	1.2e-85	178408	rps-18	GO:0005840	ribosome	cellular_component	6
TRINITY_DN10216_c0_g1	WB|WBGene00004487	100	1.2e-85	178408	rps-18	GO:0006412	translation	biological_process	8
TRINITY_DN10216_c0_g1	WB|WBGene00004487	100	1.2e-85	178408	rps-18	GO:0015935	small ribosomal subunit	cellular_component	7
TRINITY_DN10216_c0_g1	WB|WBGene00004487	100	1.2e-85	178408	rps-18	GO:0042254	ribosome biogenesis	biological_process	6
TRINITY_DN10216_c0_g2	WB|WBGene00004410	100	3.5e-27	178297	rla-2	GO:0002181	cytoplasmic translation	biological_process	9
TRINITY_DN10216_c0_g2	WB|WBGene00004410	100	3.5e-27	178297	rla-2	GO:0003735	structural constituent of ribosome	molecular_function	4
TRINITY_DN10216_c0_g2	WB|WBGene00004410	100	3.5e-27	178297	rla-2	GO:0005840	ribosome	cellular_component	6
TRINITY_DN10216_c0_g2	WB|WBGene00004410	100	3.5e-27	178297	rla-2	GO:0022625	cytosolic large ribosomal subunit	cellular_component	8
TRINITY_DN10325_c0_g1	GENEDB|PF3D7_1351400	66.2	7.7e-24	814233	PF3D7_1351400	GO:0003735	structural constituent of ribosome	molecular_function	4
TRINITY_DN10325_c0_g1	GENEDB|PF3D7_1351400	66.2	7.7e-24	814233	PF3D7_1351400	GO:0006412	translation	biological_process	8
TRINITY_DN10325_c0_g1	GENEDB|PF3D7_1351400	66.2	7.7e-24	814233	PF3D7_1351400	GO:0022625	cytosolic large ribosomal subunit	cellular_component	8
TRINITY_DN10329_c0_g1	UNIPROTKB|H9G9F8	46.8	1.7e-09	100561665	LMCD1	GO:0003714	transcription corepressor activity	molecular_function	5
TRINITY_DN10329_c0_g1	UNIPROTKB|H9G9F8	46.8	1.7e-09	100561665	LMCD1	GO:0005634	nucleus	cellular_component	6
TRINITY_DN10332_c0_g1	FB|FBgn0264695	65.9	1.6e-08	35007	Mhc	GO:0003774	motor activity	molecular_function	9
TRINITY_DN10332_c0_g1	FB|FBgn0264695	65.9	1.6e-08	35007	Mhc	GO:0005524	ATP binding	molecular_function	5
TRINITY_DN10332_c0_g1	FB|FBgn0264695	65.9	1.6e-08	35007	Mhc	GO:0005703	polytene chromosome puff	cellular_component	7
TRINITY_DN10332_c0_g1	FB|FBgn0264695	65.9	1.6e-08	35007	Mhc	GO:0006936	muscle contraction	biological_process	6
TRINITY_DN10332_c0_g1	FB|FBgn0264695	65.9	1.6e-08	35007	Mhc	GO:0007298	border follicle cell migration	biological_process	10
TRINITY_DN10332_c0_g1	FB|FBgn0264695	65.9	1.6e-08	35007	Mhc	GO:0007427	epithelial cell migration, open tracheal system	biological_process	9
TRINITY_DN10332_c0_g1	FB|FBgn0264695	65.9	1.6e-08	35007	Mhc	GO:0007517	muscle organ development	biological_process	6
TRINITY_DN10332_c0_g1	FB|FBgn0264695	65.9	1.6e-08	35007	Mhc	GO:0007527	adult somatic muscle development	biological_process	7
TRINITY_DN10332_c0_g1	FB|FBgn0264695	65.9	1.6e-08	35007	Mhc	GO:0008307	structural constituent of muscle	molecular_function	4
TRINITY_DN10332_c0_g1	FB|FBgn0264695	65.9	1.6e-08	35007	Mhc	GO:0016459	myosin complex	cellular_component	4
TRINITY_DN10332_c0_g1	FB|FBgn0264695	65.9	1.6e-08	35007	Mhc	GO:0030017	sarcomere	cellular_component	5
TRINITY_DN10332_c0_g1	FB|FBgn0264695	65.9	1.6e-08	35007	Mhc	GO:0030239	myofibril assembly	biological_process	7
TRINITY_DN10332_c0_g1	FB|FBgn0264695	65.9	1.6e-08	35007	Mhc	GO:0030241	skeletal muscle myosin thick filament assembly	biological_process	8
TRINITY_DN10332_c0_g1	FB|FBgn0264695	65.9	1.6e-08	35007	Mhc	GO:0030898	actin-dependent ATPase activity	molecular_function	11
TRINITY_DN10332_c0_g1	FB|FBgn0264695	65.9	1.6e-08	35007	Mhc	GO:0031033	myosin filament organization	biological_process	8
TRINITY_DN10332_c0_g1	FB|FBgn0264695	65.9	1.6e-08	35007	Mhc	GO:0031672	A band	cellular_component	5
TRINITY_DN10332_c0_g1	FB|FBgn0264695	65.9	1.6e-08	35007	Mhc	GO:0040011	locomotion	biological_process	3
TRINITY_DN10332_c0_g1	FB|FBgn0264695	65.9	1.6e-08	35007	Mhc	GO:0042623	ATPase activity, coupled	molecular_function	10
TRINITY_DN10332_c0_g1	FB|FBgn0264695	65.9	1.6e-08	35007	Mhc	GO:0042692	muscle cell differentiation	biological_process	6
TRINITY_DN10332_c0_g1	FB|FBgn0264695	65.9	1.6e-08	35007	Mhc	GO:0042803	protein homodimerization activity	molecular_function	6
TRINITY_DN10332_c0_g1	FB|FBgn0264695	65.9	1.6e-08	35007	Mhc	GO:0045214	sarcomere organization	biological_process	9
TRINITY_DN10332_c0_g1	FB|FBgn0264695	65.9	1.6e-08	35007	Mhc	GO:0050821	protein stabilization	biological_process	6
TRINITY_DN10332_c0_g1	FB|FBgn0264695	65.9	1.6e-08	35007	Mhc	GO:0051015	actin filament binding	molecular_function	7
TRINITY_DN10332_c0_g1	FB|FBgn0264695	65.9	1.6e-08	35007	Mhc	GO:0060361	flight	biological_process	4
TRINITY_DN10332_c0_g1	FB|FBgn0264695	65.9	1.6e-08	35007	Mhc	GO:0071689	muscle thin filament assembly	biological_process	7
TRINITY_DN1044_c0_g1	UNIPROTKB|P01303	100	8.9e-23	4852	NPY	GO:0001664	G-protein coupled receptor binding	molecular_function	6
TRINITY_DN1044_c0_g1	UNIPROTKB|P01303	100	8.9e-23	4852	NPY	GO:0001878	response to yeast	biological_process	8
TRINITY_DN1044_c0_g1	UNIPROTKB|P01303	100	8.9e-23	4852	NPY	GO:0004930	G-protein coupled receptor activity	molecular_function	6
TRINITY_DN1044_c0_g1	UNIPROTKB|P01303	100	8.9e-23	4852	NPY	GO:0005102	receptor binding	molecular_function	5
TRINITY_DN1044_c0_g1	UNIPROTKB|P01303	100	8.9e-23	4852	NPY	GO:0005184	neuropeptide hormone activity	molecular_function	8
TRINITY_DN1044_c0_g1	UNIPROTKB|P01303	100	8.9e-23	4852	NPY	GO:0005246	calcium channel regulator activity	molecular_function	6
TRINITY_DN1044_c0_g1	UNIPROTKB|P01303	100	8.9e-23	4852	NPY	GO:0005576	extracellular region	cellular_component	3
TRINITY_DN1044_c0_g1	UNIPROTKB|P01303	100	8.9e-23	4852	NPY	GO:0005615	extracellular space	cellular_component	4
TRINITY_DN1044_c0_g1	UNIPROTKB|P01303	100	8.9e-23	4852	NPY	GO:0005623	cell	cellular_component	3
TRINITY_DN1044_c0_g1	UNIPROTKB|P01303	100	8.9e-23	4852	NPY	GO:0005794	Golgi apparatus	cellular_component	6
TRINITY_DN1044_c0_g1	UNIPROTKB|P01303	100	8.9e-23	4852	NPY	GO:0006816	calcium ion transport	biological_process	10
TRINITY_DN1044_c0_g1	UNIPROTKB|P01303	100	8.9e-23	4852	NPY	GO:0006928	movement of cell or subcellular component	biological_process	4
TRINITY_DN1044_c0_g1	UNIPROTKB|P01303	100	8.9e-23	4852	NPY	GO:0007186	G-protein coupled receptor signaling pathway	biological_process	5
TRINITY_DN1044_c0_g1	UNIPROTKB|P01303	100	8.9e-23	4852	NPY	GO:0007187	G-protein coupled receptor signaling pathway, coupled to cyclic nucleotide second messenger	biological_process	6
TRINITY_DN1044_c0_g1	UNIPROTKB|P01303	100	8.9e-23	4852	NPY	GO:0007218	neuropeptide signaling pathway	biological_process	6
TRINITY_DN1044_c0_g1	UNIPROTKB|P01303	100	8.9e-23	4852	NPY	GO:0007268	chemical synaptic transmission	biological_process	9
TRINITY_DN1044_c0_g1	UNIPROTKB|P01303	100	8.9e-23	4852	NPY	GO:0007586	digestion	biological_process	4
TRINITY_DN1044_c0_g1	UNIPROTKB|P01303	100	8.9e-23	4852	NPY	GO:0007610	behavior	biological_process	3
TRINITY_DN1044_c0_g1	UNIPROTKB|P01303	100	8.9e-23	4852	NPY	GO:0007631	feeding behavior	biological_process	4
TRINITY_DN1044_c0_g1	UNIPROTKB|P01303	100	8.9e-23	4852	NPY	GO:0008015	blood circulation	biological_process	6
TRINITY_DN1044_c0_g1	UNIPROTKB|P01303	100	8.9e-23	4852	NPY	GO:0008217	regulation of blood pressure	biological_process	5
TRINITY_DN1044_c0_g1	UNIPROTKB|P01303	100	8.9e-23	4852	NPY	GO:0008283	cell proliferation	biological_process	3
TRINITY_DN1044_c0_g1	UNIPROTKB|P01303	100	8.9e-23	4852	NPY	GO:0008343	adult feeding behavior	biological_process	5
TRINITY_DN1044_c0_g1	UNIPROTKB|P01303	100	8.9e-23	4852	NPY	GO:0019731	antibacterial humoral response	biological_process	7
TRINITY_DN1044_c0_g1	UNIPROTKB|P01303	100	8.9e-23	4852	NPY	GO:0019732	antifungal humoral response	biological_process	7
TRINITY_DN1044_c0_g1	UNIPROTKB|P01303	100	8.9e-23	4852	NPY	GO:0021954	central nervous system neuron development	biological_process	7
TRINITY_DN1044_c0_g1	UNIPROTKB|P01303	100	8.9e-23	4852	NPY	GO:0021987	cerebral cortex development	biological_process	5
TRINITY_DN1044_c0_g1	UNIPROTKB|P01303	100	8.9e-23	4852	NPY	GO:0031175	neuron projection development	biological_process	7
TRINITY_DN1044_c0_g1	UNIPROTKB|P01303	100	8.9e-23	4852	NPY	GO:0032098	regulation of appetite	biological_process	5
TRINITY_DN1044_c0_g1	UNIPROTKB|P01303	100	8.9e-23	4852	NPY	GO:0032100	positive regulation of appetite	biological_process	11
TRINITY_DN1044_c0_g1	UNIPROTKB|P01303	100	8.9e-23	4852	NPY	GO:0045087	innate immune response	biological_process	5
TRINITY_DN1044_c0_g1	UNIPROTKB|P01303	100	8.9e-23	4852	NPY	GO:0050829	defense response to Gram-negative bacterium	biological_process	9
TRINITY_DN1044_c0_g1	UNIPROTKB|P01303	100	8.9e-23	4852	NPY	GO:0050830	defense response to Gram-positive bacterium	biological_process	9
TRINITY_DN10555_c0_g1	UNIPROTKB|D0NEK6	98.4	1e-28	9461371	PITG_10202	GO:0002181	cytoplasmic translation	biological_process	9
TRINITY_DN10555_c0_g1	UNIPROTKB|D0NEK6	98.4	1e-28	9461371	PITG_10202	GO:0003735	structural constituent of ribosome	molecular_function	4
TRINITY_DN10555_c0_g1	UNIPROTKB|D0NEK6	98.4	1e-28	9461371	PITG_10202	GO:0022625	cytosolic large ribosomal subunit	cellular_component	8
TRINITY_DN10672_c0_g1	UNIPROTKB|F1NA45	100	8.3e-06	-	C5H14ORF166	GO:0000993	RNA polymerase II core binding	molecular_function	7
TRINITY_DN10672_c0_g1	UNIPROTKB|F1NA45	100	8.3e-06	-	C5H14ORF166	GO:0005654	nucleoplasm	cellular_component	6
TRINITY_DN10672_c0_g1	UNIPROTKB|F1NA45	100	8.3e-06	-	C5H14ORF166	GO:0005737	cytoplasm	cellular_component	5
TRINITY_DN10672_c0_g1	UNIPROTKB|F1NA45	100	8.3e-06	-	C5H14ORF166	GO:0006388	tRNA splicing, via endonucleolytic cleavage and ligation	biological_process	12
TRINITY_DN10672_c0_g1	UNIPROTKB|F1NA45	100	8.3e-06	-	C5H14ORF166	GO:0042802	identical protein binding	molecular_function	5
TRINITY_DN10672_c0_g1	UNIPROTKB|F1NA45	100	8.3e-06	-	C5H14ORF166	GO:0045944	positive regulation of transcription by RNA polymerase II	biological_process	10
TRINITY_DN10672_c0_g1	UNIPROTKB|F1NA45	100	8.3e-06	-	C5H14ORF166	GO:0072669	tRNA-splicing ligase complex	cellular_component	4
TRINITY_DN10814_c0_g1	MGI|MGI:1922567	22.9	4.4e-11	75317	Parpbp	GO:0000785	chromatin	cellular_component	6
TRINITY_DN10814_c0_g1	MGI|MGI:1922567	22.9	4.4e-11	75317	Parpbp	GO:0003674	molecular_function	molecular_function	2
TRINITY_DN10814_c0_g1	MGI|MGI:1922567	22.9	4.4e-11	75317	Parpbp	GO:0003677	DNA binding	molecular_function	6
TRINITY_DN10814_c0_g1	MGI|MGI:1922567	22.9	4.4e-11	75317	Parpbp	GO:0005634	nucleus	cellular_component	6
TRINITY_DN10814_c0_g1	MGI|MGI:1922567	22.9	4.4e-11	75317	Parpbp	GO:0005654	nucleoplasm	cellular_component	6
TRINITY_DN10814_c0_g1	MGI|MGI:1922567	22.9	4.4e-11	75317	Parpbp	GO:0005737	cytoplasm	cellular_component	5
TRINITY_DN10814_c0_g1	MGI|MGI:1922567	22.9	4.4e-11	75317	Parpbp	GO:0006281	DNA repair	biological_process	8
TRINITY_DN10814_c0_g1	MGI|MGI:1922567	22.9	4.4e-11	75317	Parpbp	GO:0006974	cellular response to DNA damage stimulus	biological_process	6
TRINITY_DN10814_c0_g1	MGI|MGI:1922567	22.9	4.4e-11	75317	Parpbp	GO:2000042	negative regulation of double-strand break repair via homologous recombination	biological_process	11
TRINITY_DN10958_c0_g1	WB|WBGene00004432	100	4.5e-102	24104384	rpl-20	GO:0003723	RNA binding	molecular_function	6
TRINITY_DN10958_c0_g1	WB|WBGene00004432	100	4.5e-102	24104384	rpl-20	GO:0003735	structural constituent of ribosome	molecular_function	4
TRINITY_DN10958_c0_g1	WB|WBGene00004432	100	4.5e-102	24104384	rpl-20	GO:0005840	ribosome	cellular_component	6
TRINITY_DN10958_c0_g1	WB|WBGene00004432	100	4.5e-102	24104384	rpl-20	GO:0006412	translation	biological_process	8
TRINITY_DN10958_c0_g1	WB|WBGene00004432	100	4.5e-102	24104384	rpl-20	GO:0022625	cytosolic large ribosomal subunit	cellular_component	8
TRINITY_DN10958_c0_g2	WB|WBGene00004419	100	1.2e-140	177203	rpl-7A	GO:0000470	maturation of LSU-rRNA	biological_process	12
TRINITY_DN10958_c0_g2	WB|WBGene00004419	100	1.2e-140	177203	rpl-7A	GO:0003723	RNA binding	molecular_function	6
TRINITY_DN10958_c0_g2	WB|WBGene00004419	100	1.2e-140	177203	rpl-7A	GO:0005516	calmodulin binding	molecular_function	5
TRINITY_DN10958_c0_g2	WB|WBGene00004419	100	1.2e-140	177203	rpl-7A	GO:0005840	ribosome	cellular_component	6
TRINITY_DN10958_c0_g2	WB|WBGene00004419	100	1.2e-140	177203	rpl-7A	GO:0006412	translation	biological_process	8
TRINITY_DN10958_c0_g2	WB|WBGene00004419	100	1.2e-140	177203	rpl-7A	GO:0022625	cytosolic large ribosomal subunit	cellular_component	8
TRINITY_DN10985_c0_g1	ZFIN|ZDB-GENE-070912-386	71.4	1.1e-24	559247	zak	GO:0000166	nucleotide binding	molecular_function	5
TRINITY_DN10985_c0_g1	ZFIN|ZDB-GENE-070912-386	71.4	1.1e-24	559247	zak	GO:0000186	activation of MAPKK activity	biological_process	13
TRINITY_DN10985_c0_g1	ZFIN|ZDB-GENE-070912-386	71.4	1.1e-24	559247	zak	GO:0004672	protein kinase activity	molecular_function	7
TRINITY_DN10985_c0_g1	ZFIN|ZDB-GENE-070912-386	71.4	1.1e-24	559247	zak	GO:0004709	MAP kinase kinase kinase activity	molecular_function	9
TRINITY_DN10985_c0_g1	ZFIN|ZDB-GENE-070912-386	71.4	1.1e-24	559247	zak	GO:0005524	ATP binding	molecular_function	5
TRINITY_DN10985_c0_g1	ZFIN|ZDB-GENE-070912-386	71.4	1.1e-24	559247	zak	GO:0005737	cytoplasm	cellular_component	5
TRINITY_DN10985_c0_g1	ZFIN|ZDB-GENE-070912-386	71.4	1.1e-24	559247	zak	GO:0006468	protein phosphorylation	biological_process	9
TRINITY_DN10985_c0_g1	ZFIN|ZDB-GENE-070912-386	71.4	1.1e-24	559247	zak	GO:0007257	activation of JUN kinase activity	biological_process	14
TRINITY_DN10985_c0_g1	ZFIN|ZDB-GENE-070912-386	71.4	1.1e-24	559247	zak	GO:0016301	kinase activity	molecular_function	6
TRINITY_DN10985_c0_g1	ZFIN|ZDB-GENE-070912-386	71.4	1.1e-24	559247	zak	GO:0016310	phosphorylation	biological_process	7
TRINITY_DN10985_c0_g1	ZFIN|ZDB-GENE-070912-386	71.4	1.1e-24	559247	zak	GO:0016740	transferase activity	molecular_function	4
TRINITY_DN11161_c0_g2	WB|WBGene00004412	100	3.8e-113	171853	rpl-1	GO:0000470	maturation of LSU-rRNA	biological_process	12
TRINITY_DN11161_c0_g2	WB|WBGene00004412	100	3.8e-113	171853	rpl-1	GO:0003723	RNA binding	molecular_function	6
TRINITY_DN11161_c0_g2	WB|WBGene00004412	100	3.8e-113	171853	rpl-1	GO:0003735	structural constituent of ribosome	molecular_function	4
TRINITY_DN11161_c0_g2	WB|WBGene00004412	100	3.8e-113	171853	rpl-1	GO:0005840	ribosome	cellular_component	6
TRINITY_DN11161_c0_g2	WB|WBGene00004412	100	3.8e-113	171853	rpl-1	GO:0006412	translation	biological_process	8
TRINITY_DN11161_c0_g2	WB|WBGene00004412	100	3.8e-113	171853	rpl-1	GO:0015934	large ribosomal subunit	cellular_component	7
TRINITY_DN11161_c0_g2	WB|WBGene00004412	100	3.8e-113	171853	rpl-1	GO:0022625	cytosolic large ribosomal subunit	cellular_component	8
TRINITY_DN11175_c0_g1	ASPGD|ASPL0000053041	73.2	4.1e-19	-	ccgA	GO:0003674	molecular_function	molecular_function	2
TRINITY_DN11175_c0_g1	ASPGD|ASPL0000053041	73.2	4.1e-19	-	ccgA	GO:0005575	cellular_component	cellular_component	2
TRINITY_DN11175_c0_g1	ASPGD|ASPL0000053041	73.2	4.1e-19	-	ccgA	GO:0008150	biological_process	biological_process	2
TRINITY_DN1117_c0_g1	RGD|2363	91.7	2.3e-51	25680	Clps	GO:0007586	digestion	biological_process	4
TRINITY_DN1117_c0_g1	RGD|2363	91.7	2.3e-51	25680	Clps	GO:0008047	enzyme activator activity	molecular_function	5
TRINITY_DN1117_c0_g1	RGD|2363	91.7	2.3e-51	25680	Clps	GO:0009791	post-embryonic development	biological_process	4
TRINITY_DN1117_c0_g1	RGD|2363	91.7	2.3e-51	25680	Clps	GO:0016042	lipid catabolic process	biological_process	6
TRINITY_DN1117_c0_g1	RGD|2363	91.7	2.3e-51	25680	Clps	GO:0032094	response to food	biological_process	7
TRINITY_DN1117_c0_g1	RGD|2363	91.7	2.3e-51	25680	Clps	GO:0043085	positive regulation of catalytic activity	biological_process	6
TRINITY_DN1117_c0_g1	RGD|2363	91.7	2.3e-51	25680	Clps	GO:0070062	extracellular exosome	cellular_component	7
TRINITY_DN11502_c0_g1	WB|WBGene00004433	100	3.9e-83	176146	rpl-21	GO:0003735	structural constituent of ribosome	molecular_function	4
TRINITY_DN11502_c0_g1	WB|WBGene00004433	100	3.9e-83	176146	rpl-21	GO:0005622	intracellular	cellular_component	4
TRINITY_DN11502_c0_g1	WB|WBGene00004433	100	3.9e-83	176146	rpl-21	GO:0005840	ribosome	cellular_component	6
TRINITY_DN11502_c0_g1	WB|WBGene00004433	100	3.9e-83	176146	rpl-21	GO:0006412	translation	biological_process	8
TRINITY_DN11502_c0_g1	WB|WBGene00004433	100	3.9e-83	176146	rpl-21	GO:0022625	cytosolic large ribosomal subunit	cellular_component	8
TRINITY_DN11577_c0_g1	FB|FBgn0011211	89	1.6e-35	37617	blw	GO:0000275	mitochondrial proton-transporting ATP synthase complex, catalytic core F(1)	cellular_component	7
TRINITY_DN11577_c0_g1	FB|FBgn0011211	89	1.6e-35	37617	blw	GO:0005524	ATP binding	molecular_function	5
TRINITY_DN11577_c0_g1	FB|FBgn0011211	89	1.6e-35	37617	blw	GO:0005739	mitochondrion	cellular_component	6
TRINITY_DN11577_c0_g1	FB|FBgn0011211	89	1.6e-35	37617	blw	GO:0006909	phagocytosis	biological_process	7
TRINITY_DN11577_c0_g1	FB|FBgn0011211	89	1.6e-35	37617	blw	GO:0007286	spermatid development	biological_process	6
TRINITY_DN11577_c0_g1	FB|FBgn0011211	89	1.6e-35	37617	blw	GO:0015986	ATP synthesis coupled proton transport	biological_process	13
TRINITY_DN11577_c0_g1	FB|FBgn0011211	89	1.6e-35	37617	blw	GO:0019915	lipid storage	biological_process	5
TRINITY_DN11577_c0_g1	FB|FBgn0011211	89	1.6e-35	37617	blw	GO:0022900	electron transport chain	biological_process	6
TRINITY_DN11577_c0_g1	FB|FBgn0011211	89	1.6e-35	37617	blw	GO:0040007	growth	biological_process	3
TRINITY_DN11577_c0_g1	FB|FBgn0011211	89	1.6e-35	37617	blw	GO:0046933	proton-transporting ATP synthase activity, rotational mechanism	molecular_function	10
TRINITY_DN11577_c0_g1	FB|FBgn0011211	89	1.6e-35	37617	blw	GO:1902769	regulation of choline O-acetyltransferase activity	biological_process	7
TRINITY_DN12090_c0_g1	MGI|MGI:102498	90.4	3.7e-213	17719	mt-Nd4	GO:0003954	NADH dehydrogenase activity	molecular_function	6
TRINITY_DN12090_c0_g1	MGI|MGI:102498	90.4	3.7e-213	17719	mt-Nd4	GO:0005739	mitochondrion	cellular_component	6
TRINITY_DN12090_c0_g1	MGI|MGI:102498	90.4	3.7e-213	17719	mt-Nd4	GO:0005747	mitochondrial respiratory chain complex I	cellular_component	7
TRINITY_DN12090_c0_g1	MGI|MGI:102498	90.4	3.7e-213	17719	mt-Nd4	GO:0006120	mitochondrial electron transport, NADH to ubiquinone	biological_process	8
TRINITY_DN12090_c0_g1	MGI|MGI:102498	90.4	3.7e-213	17719	mt-Nd4	GO:0007568	aging	biological_process	4
TRINITY_DN12090_c0_g1	MGI|MGI:102498	90.4	3.7e-213	17719	mt-Nd4	GO:0008137	NADH dehydrogenase (ubiquinone) activity	molecular_function	8
TRINITY_DN12090_c0_g1	MGI|MGI:102498	90.4	3.7e-213	17719	mt-Nd4	GO:0009060	aerobic respiration	biological_process	8
TRINITY_DN12090_c0_g1	MGI|MGI:102498	90.4	3.7e-213	17719	mt-Nd4	GO:0015990	electron transport coupled proton transport	biological_process	11
TRINITY_DN12090_c0_g1	MGI|MGI:102498	90.4	3.7e-213	17719	mt-Nd4	GO:0016020	membrane	cellular_component	3
TRINITY_DN12090_c0_g1	MGI|MGI:102498	90.4	3.7e-213	17719	mt-Nd4	GO:0016021	integral component of membrane	cellular_component	5
TRINITY_DN12090_c0_g1	MGI|MGI:102498	90.4	3.7e-213	17719	mt-Nd4	GO:0016491	oxidoreductase activity	molecular_function	4
TRINITY_DN12090_c0_g1	MGI|MGI:102498	90.4	3.7e-213	17719	mt-Nd4	GO:0042773	ATP synthesis coupled electron transport	biological_process	8
TRINITY_DN12090_c0_g1	MGI|MGI:102498	90.4	3.7e-213	17719	mt-Nd4	GO:0045271	respiratory chain complex I	cellular_component	6
TRINITY_DN12090_c0_g1	MGI|MGI:102498	90.4	3.7e-213	17719	mt-Nd4	GO:0048039	ubiquinone binding	molecular_function	6
TRINITY_DN12090_c0_g1	MGI|MGI:102498	90.4	3.7e-213	17719	mt-Nd4	GO:0055114	oxidation-reduction process	biological_process	4
TRINITY_DN12090_c0_g1	MGI|MGI:102498	90.4	3.7e-213	17719	mt-Nd4	GO:0070469	respiratory chain	cellular_component	4
TRINITY_DN12323_c0_g1	UNIPROTKB|P29034	100	5.3e-51	6273	S100A2	GO:0005509	calcium ion binding	molecular_function	7
TRINITY_DN12323_c0_g1	UNIPROTKB|P29034	100	5.3e-51	6273	S100A2	GO:0005515	protein binding	molecular_function	4
TRINITY_DN12323_c0_g1	UNIPROTKB|P29034	100	5.3e-51	6273	S100A2	GO:0005575	cellular_component	cellular_component	2
TRINITY_DN12323_c0_g1	UNIPROTKB|P29034	100	5.3e-51	6273	S100A2	GO:0042802	identical protein binding	molecular_function	5
TRINITY_DN12323_c0_g1	UNIPROTKB|P29034	100	5.3e-51	6273	S100A2	GO:0043542	endothelial cell migration	biological_process	9
TRINITY_DN12480_c0_g1	TAIR|locus:2035878	30.2	1.5e-13	840851	AtNPC1	GO:0005886	plasma membrane	cellular_component	4
TRINITY_DN12480_c0_g1	TAIR|locus:2035878	30.2	1.5e-13	840851	AtNPC1	GO:0008158	hedgehog receptor activity	molecular_function	6
TRINITY_DN12480_c0_g1	TAIR|locus:2035878	30.2	1.5e-13	840851	AtNPC1	GO:0009506	plasmodesma	cellular_component	5
TRINITY_DN12480_c0_g1	TAIR|locus:2035878	30.2	1.5e-13	840851	AtNPC1	GO:0009555	pollen development	biological_process	6
TRINITY_DN12480_c0_g1	TAIR|locus:2035878	30.2	1.5e-13	840851	AtNPC1	GO:0016020	membrane	cellular_component	3
TRINITY_DN12480_c0_g1	TAIR|locus:2035878	30.2	1.5e-13	840851	AtNPC1	GO:0090153	regulation of sphingolipid biosynthetic process	biological_process	8
TRINITY_DN12596_c0_g1	TAIR|locus:2049359	93.5	2.6e-43	816705	RBGA3	GO:0000380	alternative mRNA splicing, via spliceosome	biological_process	14
TRINITY_DN12596_c0_g1	TAIR|locus:2049359	93.5	2.6e-43	816705	RBGA3	GO:0003690	double-stranded DNA binding	molecular_function	7
TRINITY_DN12596_c0_g1	TAIR|locus:2049359	93.5	2.6e-43	816705	RBGA3	GO:0003697	single-stranded DNA binding	molecular_function	7
TRINITY_DN12596_c0_g1	TAIR|locus:2049359	93.5	2.6e-43	816705	RBGA3	GO:0003723	RNA binding	molecular_function	6
TRINITY_DN12596_c0_g1	TAIR|locus:2049359	93.5	2.6e-43	816705	RBGA3	GO:0003729	mRNA binding	molecular_function	7
TRINITY_DN12596_c0_g1	TAIR|locus:2049359	93.5	2.6e-43	816705	RBGA3	GO:0005515	protein binding	molecular_function	4
TRINITY_DN12596_c0_g1	TAIR|locus:2049359	93.5	2.6e-43	816705	RBGA3	GO:0005634	nucleus	cellular_component	6
TRINITY_DN12596_c0_g1	TAIR|locus:2049359	93.5	2.6e-43	816705	RBGA3	GO:0005737	cytoplasm	cellular_component	5
TRINITY_DN12596_c0_g1	TAIR|locus:2049359	93.5	2.6e-43	816705	RBGA3	GO:0005739	mitochondrion	cellular_component	6
TRINITY_DN12596_c0_g1	TAIR|locus:2049359	93.5	2.6e-43	816705	RBGA3	GO:0005777	peroxisome	cellular_component	7
TRINITY_DN12596_c0_g1	TAIR|locus:2049359	93.5	2.6e-43	816705	RBGA3	GO:0005829	cytosol	cellular_component	6
TRINITY_DN12596_c0_g1	TAIR|locus:2049359	93.5	2.6e-43	816705	RBGA3	GO:0006406	mRNA export from nucleus	biological_process	11
TRINITY_DN12596_c0_g1	TAIR|locus:2049359	93.5	2.6e-43	816705	RBGA3	GO:0006970	response to osmotic stress	biological_process	5
TRINITY_DN12596_c0_g1	TAIR|locus:2049359	93.5	2.6e-43	816705	RBGA3	GO:0007623	circadian rhythm	biological_process	4
TRINITY_DN12596_c0_g1	TAIR|locus:2049359	93.5	2.6e-43	816705	RBGA3	GO:0009409	response to cold	biological_process	5
TRINITY_DN12596_c0_g1	TAIR|locus:2049359	93.5	2.6e-43	816705	RBGA3	GO:0009414	response to water deprivation	biological_process	5
TRINITY_DN12596_c0_g1	TAIR|locus:2049359	93.5	2.6e-43	816705	RBGA3	GO:0009506	plasmodesma	cellular_component	5
TRINITY_DN12596_c0_g1	TAIR|locus:2049359	93.5	2.6e-43	816705	RBGA3	GO:0009507	chloroplast	cellular_component	7
TRINITY_DN12596_c0_g1	TAIR|locus:2049359	93.5	2.6e-43	816705	RBGA3	GO:0009651	response to salt stress	biological_process	6
TRINITY_DN12596_c0_g1	TAIR|locus:2049359	93.5	2.6e-43	816705	RBGA3	GO:0009735	response to cytokinin	biological_process	6
TRINITY_DN12596_c0_g1	TAIR|locus:2049359	93.5	2.6e-43	816705	RBGA3	GO:0010043	response to zinc ion	biological_process	7
TRINITY_DN12596_c0_g1	TAIR|locus:2049359	93.5	2.6e-43	816705	RBGA3	GO:0010119	regulation of stomatal movement	biological_process	6
TRINITY_DN12596_c0_g1	TAIR|locus:2049359	93.5	2.6e-43	816705	RBGA3	GO:0010228	vegetative to reproductive phase transition of meristem	biological_process	5
TRINITY_DN12596_c0_g1	TAIR|locus:2049359	93.5	2.6e-43	816705	RBGA3	GO:0010501	RNA secondary structure unwinding	biological_process	9
TRINITY_DN12596_c0_g1	TAIR|locus:2049359	93.5	2.6e-43	816705	RBGA3	GO:0032508	DNA duplex unwinding	biological_process	9
TRINITY_DN12596_c0_g1	TAIR|locus:2049359	93.5	2.6e-43	816705	RBGA3	GO:0045087	innate immune response	biological_process	5
TRINITY_DN12596_c0_g1	TAIR|locus:2049359	93.5	2.6e-43	816705	RBGA3	GO:0046686	response to cadmium ion	biological_process	7
TRINITY_DN12596_c0_g1	TAIR|locus:2049359	93.5	2.6e-43	816705	RBGA3	GO:0048046	apoplast	cellular_component	4
TRINITY_DN12881_c0_g1	WB|WBGene00004456	64.8	4.3e-31	175070	rpl-43	GO:0003735	structural constituent of ribosome	molecular_function	4
TRINITY_DN12881_c0_g1	WB|WBGene00004456	64.8	4.3e-31	175070	rpl-43	GO:0005622	intracellular	cellular_component	4
TRINITY_DN12881_c0_g1	WB|WBGene00004456	64.8	4.3e-31	175070	rpl-43	GO:0005840	ribosome	cellular_component	6
TRINITY_DN12881_c0_g1	WB|WBGene00004456	64.8	4.3e-31	175070	rpl-43	GO:0006412	translation	biological_process	8
TRINITY_DN12881_c0_g1	WB|WBGene00004456	64.8	4.3e-31	175070	rpl-43	GO:0046872	metal ion binding	molecular_function	6
TRINITY_DN12992_c0_g1	TAIR|locus:2128936	79.3	1e-38	829150	XTH24	GO:0004553	hydrolase activity, hydrolyzing O-glycosyl compounds	molecular_function	6
TRINITY_DN12992_c0_g1	TAIR|locus:2128936	79.3	1e-38	829150	XTH24	GO:0005576	extracellular region	cellular_component	3
TRINITY_DN12992_c0_g1	TAIR|locus:2128936	79.3	1e-38	829150	XTH24	GO:0005618	cell wall	cellular_component	5
TRINITY_DN12992_c0_g1	TAIR|locus:2128936	79.3	1e-38	829150	XTH24	GO:0005737	cytoplasm	cellular_component	5
TRINITY_DN12992_c0_g1	TAIR|locus:2128936	79.3	1e-38	829150	XTH24	GO:0005794	Golgi apparatus	cellular_component	6
TRINITY_DN12992_c0_g1	TAIR|locus:2128936	79.3	1e-38	829150	XTH24	GO:0005886	plasma membrane	cellular_component	4
TRINITY_DN12992_c0_g1	TAIR|locus:2128936	79.3	1e-38	829150	XTH24	GO:0007568	aging	biological_process	4
TRINITY_DN12992_c0_g1	TAIR|locus:2128936	79.3	1e-38	829150	XTH24	GO:0009505	plant-type cell wall	cellular_component	6
TRINITY_DN12992_c0_g1	TAIR|locus:2128936	79.3	1e-38	829150	XTH24	GO:0009739	response to gibberellin	biological_process	6
TRINITY_DN12992_c0_g1	TAIR|locus:2128936	79.3	1e-38	829150	XTH24	GO:0009740	gibberellic acid mediated signaling pathway	biological_process	7
TRINITY_DN12992_c0_g1	TAIR|locus:2128936	79.3	1e-38	829150	XTH24	GO:0009741	response to brassinosteroid	biological_process	6
TRINITY_DN12992_c0_g1	TAIR|locus:2128936	79.3	1e-38	829150	XTH24	GO:0009828	plant-type cell wall loosening	biological_process	9
TRINITY_DN12992_c0_g1	TAIR|locus:2128936	79.3	1e-38	829150	XTH24	GO:0010411	xyloglucan metabolic process	biological_process	9
TRINITY_DN12992_c0_g1	TAIR|locus:2128936	79.3	1e-38	829150	XTH24	GO:0016762	xyloglucan:xyloglucosyl transferase activity	molecular_function	8
TRINITY_DN12992_c0_g1	TAIR|locus:2128936	79.3	1e-38	829150	XTH24	GO:0016798	hydrolase activity, acting on glycosyl bonds	molecular_function	5
TRINITY_DN12992_c0_g1	TAIR|locus:2128936	79.3	1e-38	829150	XTH24	GO:0042546	cell wall biogenesis	biological_process	5
TRINITY_DN12992_c0_g1	TAIR|locus:2128936	79.3	1e-38	829150	XTH24	GO:0048046	apoplast	cellular_component	4
TRINITY_DN12992_c0_g1	TAIR|locus:2128936	79.3	1e-38	829150	XTH24	GO:0071669	plant-type cell wall organization or biogenesis	biological_process	5
TRINITY_DN1301_c0_g1	WB|WBGene00004418	100	4.1e-132	171602	rpl-7	GO:0000463	maturation of LSU-rRNA from tricistronic rRNA transcript (SSU-rRNA, 5.8S rRNA, LSU-rRNA)	biological_process	13
TRINITY_DN1301_c0_g1	WB|WBGene00004418	100	4.1e-132	171602	rpl-7	GO:0002181	cytoplasmic translation	biological_process	9
TRINITY_DN1301_c0_g1	WB|WBGene00004418	100	4.1e-132	171602	rpl-7	GO:0003723	RNA binding	molecular_function	6
TRINITY_DN1301_c0_g1	WB|WBGene00004418	100	4.1e-132	171602	rpl-7	GO:0003735	structural constituent of ribosome	molecular_function	4
TRINITY_DN1301_c0_g1	WB|WBGene00004418	100	4.1e-132	171602	rpl-7	GO:0005840	ribosome	cellular_component	6
TRINITY_DN1301_c0_g1	WB|WBGene00004418	100	4.1e-132	171602	rpl-7	GO:0022625	cytosolic large ribosomal subunit	cellular_component	8
TRINITY_DN1315_c0_g1	WB|WBGene00004416	100	1.1e-158	174371	rpl-5	GO:0000027	ribosomal large subunit assembly	biological_process	9
TRINITY_DN1315_c0_g1	WB|WBGene00004416	100	1.1e-158	174371	rpl-5	GO:0003723	RNA binding	molecular_function	6
TRINITY_DN1315_c0_g1	WB|WBGene00004416	100	1.1e-158	174371	rpl-5	GO:0003735	structural constituent of ribosome	molecular_function	4
TRINITY_DN1315_c0_g1	WB|WBGene00004416	100	1.1e-158	174371	rpl-5	GO:0005622	intracellular	cellular_component	4
TRINITY_DN1315_c0_g1	WB|WBGene00004416	100	1.1e-158	174371	rpl-5	GO:0005634	nucleus	cellular_component	6
TRINITY_DN1315_c0_g1	WB|WBGene00004416	100	1.1e-158	174371	rpl-5	GO:0005737	cytoplasm	cellular_component	5
TRINITY_DN1315_c0_g1	WB|WBGene00004416	100	1.1e-158	174371	rpl-5	GO:0005840	ribosome	cellular_component	6
TRINITY_DN1315_c0_g1	WB|WBGene00004416	100	1.1e-158	174371	rpl-5	GO:0006412	translation	biological_process	8
TRINITY_DN1315_c0_g1	WB|WBGene00004416	100	1.1e-158	174371	rpl-5	GO:0008097	5S rRNA binding	molecular_function	8
TRINITY_DN1315_c0_g1	WB|WBGene00004416	100	1.1e-158	174371	rpl-5	GO:0019843	rRNA binding	molecular_function	7
TRINITY_DN1315_c0_g1	WB|WBGene00004416	100	1.1e-158	174371	rpl-5	GO:0022625	cytosolic large ribosomal subunit	cellular_component	8
TRINITY_DN13180_c0_g1	UNIPROTKB|B7QLH7	61.9	1.2e-58	8043060	IscW_ISCW014869	GO:0000469	cleavage involved in rRNA processing	biological_process	10
TRINITY_DN13180_c0_g1	UNIPROTKB|B7QLH7	61.9	1.2e-58	8043060	IscW_ISCW014869	GO:0000470	maturation of LSU-rRNA	biological_process	12
TRINITY_DN13180_c0_g1	UNIPROTKB|B7QLH7	61.9	1.2e-58	8043060	IscW_ISCW014869	GO:0006412	translation	biological_process	8
TRINITY_DN13180_c0_g1	UNIPROTKB|B7QLH7	61.9	1.2e-58	8043060	IscW_ISCW014869	GO:0022625	cytosolic large ribosomal subunit	cellular_component	8
TRINITY_DN13180_c0_g1	UNIPROTKB|B7QLH7	61.9	1.2e-58	8043060	IscW_ISCW014869	GO:0031118	rRNA pseudouridine synthesis	biological_process	13
TRINITY_DN13180_c0_g1	UNIPROTKB|B7QLH7	61.9	1.2e-58	8043060	IscW_ISCW014869	GO:0031120	snRNA pseudouridine synthesis	biological_process	11
TRINITY_DN13180_c0_g1	UNIPROTKB|B7QLH7	61.9	1.2e-58	8043060	IscW_ISCW014869	GO:0031429	box H/ACA snoRNP complex	cellular_component	7
TRINITY_DN13180_c0_g1	UNIPROTKB|B7QLH7	61.9	1.2e-58	8043060	IscW_ISCW014869	GO:0034513	box H/ACA snoRNA binding	molecular_function	8
TRINITY_DN13207_c0_g1	FB|FBgn0015756	60.3	1.3e-15	34526	RpL9	GO:0002181	cytoplasmic translation	biological_process	9
TRINITY_DN13207_c0_g1	FB|FBgn0015756	60.3	1.3e-15	34526	RpL9	GO:0003723	RNA binding	molecular_function	6
TRINITY_DN13207_c0_g1	FB|FBgn0015756	60.3	1.3e-15	34526	RpL9	GO:0003735	structural constituent of ribosome	molecular_function	4
TRINITY_DN13207_c0_g1	FB|FBgn0015756	60.3	1.3e-15	34526	RpL9	GO:0005840	ribosome	cellular_component	6
TRINITY_DN13207_c0_g1	FB|FBgn0015756	60.3	1.3e-15	34526	RpL9	GO:0006412	translation	biological_process	8
TRINITY_DN13207_c0_g1	FB|FBgn0015756	60.3	1.3e-15	34526	RpL9	GO:0019843	rRNA binding	molecular_function	7
TRINITY_DN13207_c0_g1	FB|FBgn0015756	60.3	1.3e-15	34526	RpL9	GO:0022625	cytosolic large ribosomal subunit	cellular_component	8
TRINITY_DN13207_c0_g1	FB|FBgn0015756	60.3	1.3e-15	34526	RpL9	GO:0022626	cytosolic ribosome	cellular_component	7
TRINITY_DN1338_c0_g1	WB|WBGene00004483	100	4.3e-80	176006	rps-14	GO:0000028	ribosomal small subunit assembly	biological_process	9
TRINITY_DN1338_c0_g1	WB|WBGene00004483	100	4.3e-80	176006	rps-14	GO:0000462	maturation of SSU-rRNA from tricistronic rRNA transcript (SSU-rRNA, 5.8S rRNA, LSU-rRNA)	biological_process	13
TRINITY_DN1338_c0_g1	WB|WBGene00004483	100	4.3e-80	176006	rps-14	GO:0003674	molecular_function	molecular_function	2
TRINITY_DN1338_c0_g1	WB|WBGene00004483	100	4.3e-80	176006	rps-14	GO:0003735	structural constituent of ribosome	molecular_function	4
TRINITY_DN1338_c0_g1	WB|WBGene00004483	100	4.3e-80	176006	rps-14	GO:0005575	cellular_component	cellular_component	2
TRINITY_DN1338_c0_g1	WB|WBGene00004483	100	4.3e-80	176006	rps-14	GO:0005840	ribosome	cellular_component	6
TRINITY_DN1338_c0_g1	WB|WBGene00004483	100	4.3e-80	176006	rps-14	GO:0006412	translation	biological_process	8
TRINITY_DN1338_c0_g1	WB|WBGene00004483	100	4.3e-80	176006	rps-14	GO:0022627	cytosolic small ribosomal subunit	cellular_component	8
TRINITY_DN1338_c0_g1	WB|WBGene00004483	100	4.3e-80	176006	rps-14	GO:0048027	mRNA 5'-UTR binding	molecular_function	8
TRINITY_DN1338_c0_g1	WB|WBGene00004483	100	4.3e-80	176006	rps-14	GO:0070181	small ribosomal subunit rRNA binding	molecular_function	8
TRINITY_DN1350_c0_g1	ASPGD|ASPL0000007902	62.1	1.3e-12	-	AN11510	GO:0003674	molecular_function	molecular_function	2
TRINITY_DN1350_c0_g1	ASPGD|ASPL0000007902	62.1	1.3e-12	-	AN11510	GO:0005575	cellular_component	cellular_component	2
TRINITY_DN1350_c0_g1	ASPGD|ASPL0000007902	62.1	1.3e-12	-	AN11510	GO:0006952	defense response	biological_process	5
TRINITY_DN1374_c0_g1	TAIR|locus:505006559	56.9	1.8e-11	829607	AT4G34555	GO:0003735	structural constituent of ribosome	molecular_function	4
TRINITY_DN1374_c0_g1	TAIR|locus:505006559	56.9	1.8e-11	829607	AT4G34555	GO:0005737	cytoplasm	cellular_component	5
TRINITY_DN1374_c0_g1	TAIR|locus:505006559	56.9	1.8e-11	829607	AT4G34555	GO:0005794	Golgi apparatus	cellular_component	6
TRINITY_DN1374_c0_g1	TAIR|locus:505006559	56.9	1.8e-11	829607	AT4G34555	GO:0005840	ribosome	cellular_component	6
TRINITY_DN1374_c0_g1	TAIR|locus:505006559	56.9	1.8e-11	829607	AT4G34555	GO:0006412	translation	biological_process	8
TRINITY_DN1374_c0_g1	TAIR|locus:505006559	56.9	1.8e-11	829607	AT4G34555	GO:0022627	cytosolic small ribosomal subunit	cellular_component	8
TRINITY_DN13981_c0_g1	UNIPROTKB|B7P5L4	78.9	1.9e-19	8024960	IscW_ISCW015707	GO:0004842	ubiquitin-protein transferase activity	molecular_function	6
TRINITY_DN13981_c0_g1	UNIPROTKB|B7P5L4	78.9	1.9e-19	8024960	IscW_ISCW015707	GO:0031463	Cul3-RING ubiquitin ligase complex	cellular_component	7
TRINITY_DN14368_c0_g1	UNIPROTKB|F1MLW0	98.6	2.5e-09	281660	CALD1	GO:0003779	actin binding	molecular_function	6
TRINITY_DN14368_c0_g1	UNIPROTKB|F1MLW0	98.6	2.5e-09	281660	CALD1	GO:0005516	calmodulin binding	molecular_function	5
TRINITY_DN14368_c0_g1	UNIPROTKB|F1MLW0	98.6	2.5e-09	281660	CALD1	GO:0005886	plasma membrane	cellular_component	4
TRINITY_DN14368_c0_g1	UNIPROTKB|F1MLW0	98.6	2.5e-09	281660	CALD1	GO:0006936	muscle contraction	biological_process	6
TRINITY_DN14368_c0_g1	UNIPROTKB|F1MLW0	98.6	2.5e-09	281660	CALD1	GO:0017022	myosin binding	molecular_function	6
TRINITY_DN14368_c0_g1	UNIPROTKB|F1MLW0	98.6	2.5e-09	281660	CALD1	GO:0030478	actin cap	cellular_component	6
TRINITY_DN14370_c0_g1	MGI|MGI:104614	100	6.4e-35	12864	Cox6c	GO:0003674	molecular_function	molecular_function	2
TRINITY_DN14370_c0_g1	MGI|MGI:104614	100	6.4e-35	12864	Cox6c	GO:0004129	cytochrome-c oxidase activity	molecular_function	6
TRINITY_DN14370_c0_g1	MGI|MGI:104614	100	6.4e-35	12864	Cox6c	GO:0005739	mitochondrion	cellular_component	6
TRINITY_DN14370_c0_g1	MGI|MGI:104614	100	6.4e-35	12864	Cox6c	GO:0005743	mitochondrial inner membrane	cellular_component	6
TRINITY_DN14370_c0_g1	MGI|MGI:104614	100	6.4e-35	12864	Cox6c	GO:0008150	biological_process	biological_process	2
TRINITY_DN14370_c0_g1	MGI|MGI:104614	100	6.4e-35	12864	Cox6c	GO:0016020	membrane	cellular_component	3
TRINITY_DN14370_c0_g1	MGI|MGI:104614	100	6.4e-35	12864	Cox6c	GO:0016021	integral component of membrane	cellular_component	5
TRINITY_DN14485_c0_g1	MGI|MGI:1919785	100	2.6e-34	72535	Aldh1b1	GO:0004029	aldehyde dehydrogenase (NAD) activity	molecular_function	7
TRINITY_DN14485_c0_g1	MGI|MGI:1919785	100	2.6e-34	72535	Aldh1b1	GO:0005654	nucleoplasm	cellular_component	6
TRINITY_DN14485_c0_g1	MGI|MGI:1919785	100	2.6e-34	72535	Aldh1b1	GO:0005739	mitochondrion	cellular_component	6
TRINITY_DN14485_c0_g1	MGI|MGI:1919785	100	2.6e-34	72535	Aldh1b1	GO:0008152	metabolic process	biological_process	3
TRINITY_DN14485_c0_g1	MGI|MGI:1919785	100	2.6e-34	72535	Aldh1b1	GO:0016491	oxidoreductase activity	molecular_function	4
TRINITY_DN14485_c0_g1	MGI|MGI:1919785	100	2.6e-34	72535	Aldh1b1	GO:0043231	intracellular membrane-bounded organelle	cellular_component	5
TRINITY_DN14485_c0_g1	MGI|MGI:1919785	100	2.6e-34	72535	Aldh1b1	GO:0055114	oxidation-reduction process	biological_process	4
TRINITY_DN14503_c0_g1	UNIPROTKB|G1NPR7	86.1	9e-20	-	LAMP1	GO:0016020	membrane	cellular_component	3
TRINITY_DN14516_c0_g1	CGD|CAL0000160506	36.4	6.5e-06	8044282	Cd36_00730	GO:0003723	RNA binding	molecular_function	6
TRINITY_DN14516_c0_g1	CGD|CAL0000160506	36.4	6.5e-06	8044282	Cd36_00730	GO:0003964	RNA-directed DNA polymerase activity	molecular_function	8
TRINITY_DN14516_c0_g1	CGD|CAL0000160506	36.4	6.5e-06	8044282	Cd36_00730	GO:0006278	RNA-dependent DNA biosynthetic process	biological_process	9
TRINITY_DN14692_c0_g1	ASPGD|ASPL0000046807	57.1	5.1e-07	2874716	AN2445	GO:0003674	molecular_function	molecular_function	2
TRINITY_DN14692_c0_g1	ASPGD|ASPL0000046807	57.1	5.1e-07	2874716	AN2445	GO:0005575	cellular_component	cellular_component	2
TRINITY_DN14692_c0_g1	ASPGD|ASPL0000046807	57.1	5.1e-07	2874716	AN2445	GO:0008150	biological_process	biological_process	2
TRINITY_DN14985_c0_g1	TAIR|locus:2179699	89.5	2.7e-41	832697	AT5G26280	GO:0009506	plasmodesma	cellular_component	5
TRINITY_DN14985_c0_g1	TAIR|locus:2179699	89.5	2.7e-41	832697	AT5G26280	GO:0009507	chloroplast	cellular_component	7
TRINITY_DN14985_c0_g1	TAIR|locus:2179699	89.5	2.7e-41	832697	AT5G26280	GO:0016020	membrane	cellular_component	3
TRINITY_DN15069_c0_g1	UNIPROTKB|K4DCL4	80.3	5.2e-22	101265617	K4DCL4	GO:0009416	response to light stimulus	biological_process	6
TRINITY_DN15069_c0_g1	UNIPROTKB|K4DCL4	80.3	5.2e-22	101265617	K4DCL4	GO:0009535	chloroplast thylakoid membrane	cellular_component	8
TRINITY_DN15069_c0_g1	UNIPROTKB|K4DCL4	80.3	5.2e-22	101265617	K4DCL4	GO:0009768	photosynthesis, light harvesting in photosystem I	biological_process	7
TRINITY_DN15069_c0_g1	UNIPROTKB|K4DCL4	80.3	5.2e-22	101265617	K4DCL4	GO:0009941	chloroplast envelope	cellular_component	7
TRINITY_DN15069_c0_g1	UNIPROTKB|K4DCL4	80.3	5.2e-22	101265617	K4DCL4	GO:0010287	plastoglobule	cellular_component	8
TRINITY_DN15069_c0_g1	UNIPROTKB|K4DCL4	80.3	5.2e-22	101265617	K4DCL4	GO:0016168	chlorophyll binding	molecular_function	6
TRINITY_DN15069_c0_g1	UNIPROTKB|K4DCL4	80.3	5.2e-22	101265617	K4DCL4	GO:0031409	pigment binding	molecular_function	4
TRINITY_DN15331_c0_g1	TAIR|locus:2080560	64.5	1.7e-15	824861	CRD1	GO:0003677	DNA binding	molecular_function	6
TRINITY_DN15331_c0_g1	TAIR|locus:2080560	64.5	1.7e-15	824861	CRD1	GO:0005515	protein binding	molecular_function	4
TRINITY_DN15331_c0_g1	TAIR|locus:2080560	64.5	1.7e-15	824861	CRD1	GO:0009507	chloroplast	cellular_component	7
TRINITY_DN15331_c0_g1	TAIR|locus:2080560	64.5	1.7e-15	824861	CRD1	GO:0009534	chloroplast thylakoid	cellular_component	7
TRINITY_DN15331_c0_g1	TAIR|locus:2080560	64.5	1.7e-15	824861	CRD1	GO:0009535	chloroplast thylakoid membrane	cellular_component	8
TRINITY_DN15331_c0_g1	TAIR|locus:2080560	64.5	1.7e-15	824861	CRD1	GO:0009658	chloroplast organization	biological_process	7
TRINITY_DN15331_c0_g1	TAIR|locus:2080560	64.5	1.7e-15	824861	CRD1	GO:0009706	chloroplast inner membrane	cellular_component	7
TRINITY_DN15331_c0_g1	TAIR|locus:2080560	64.5	1.7e-15	824861	CRD1	GO:0009941	chloroplast envelope	cellular_component	7
TRINITY_DN15331_c0_g1	TAIR|locus:2080560	64.5	1.7e-15	824861	CRD1	GO:0015979	photosynthesis	biological_process	5
TRINITY_DN15331_c0_g1	TAIR|locus:2080560	64.5	1.7e-15	824861	CRD1	GO:0015995	chlorophyll biosynthetic process	biological_process	9
TRINITY_DN15331_c0_g1	TAIR|locus:2080560	64.5	1.7e-15	824861	CRD1	GO:0046872	metal ion binding	molecular_function	6
TRINITY_DN15331_c0_g1	TAIR|locus:2080560	64.5	1.7e-15	824861	CRD1	GO:0048529	magnesium-protoporphyrin IX monomethyl ester (oxidative) cyclase activity	molecular_function	7
TRINITY_DN15331_c0_g1	TAIR|locus:2080560	64.5	1.7e-15	824861	CRD1	GO:0055114	oxidation-reduction process	biological_process	4
TRINITY_DN15331_c0_g1	TAIR|locus:2080560	64.5	1.7e-15	824861	CRD1	GO:1901401	regulation of tetrapyrrole metabolic process	biological_process	7
TRINITY_DN1541_c0_g1	UNIPROTKB|F2Z4M7	100	4e-47	769981	RPL37A	GO:0003735	structural constituent of ribosome	molecular_function	4
TRINITY_DN1541_c0_g1	UNIPROTKB|F2Z4M7	100	4e-47	769981	RPL37A	GO:0005634	nucleus	cellular_component	6
TRINITY_DN1541_c0_g1	UNIPROTKB|F2Z4M7	100	4e-47	769981	RPL37A	GO:0005925	focal adhesion	cellular_component	7
TRINITY_DN1541_c0_g1	UNIPROTKB|F2Z4M7	100	4e-47	769981	RPL37A	GO:0006412	translation	biological_process	8
TRINITY_DN1541_c0_g1	UNIPROTKB|F2Z4M7	100	4e-47	769981	RPL37A	GO:0022625	cytosolic large ribosomal subunit	cellular_component	8
TRINITY_DN1541_c0_g1	UNIPROTKB|F2Z4M7	100	4e-47	769981	RPL37A	GO:0070062	extracellular exosome	cellular_component	7
TRINITY_DN15491_c0_g1	UNIPROTKB|B7P5D0	88.1	4e-24	8024849	IscW_ISCW001299	GO:0005794	Golgi apparatus	cellular_component	6
TRINITY_DN15491_c0_g1	UNIPROTKB|B7P5D0	88.1	4e-24	8024849	IscW_ISCW001299	GO:0005886	plasma membrane	cellular_component	4
TRINITY_DN15731_c0_g2	WB|WBGene00004469	100	4.8e-153	175628	rps-0	GO:0000028	ribosomal small subunit assembly	biological_process	9
TRINITY_DN15731_c0_g2	WB|WBGene00004469	100	4.8e-153	175628	rps-0	GO:0000447	endonucleolytic cleavage in ITS1 to separate SSU-rRNA from 5.8S rRNA and LSU-rRNA from tricistronic rRNA transcript (SSU-rRNA, 5.8S rRNA, LSU-rRNA)	biological_process	13
TRINITY_DN15731_c0_g2	WB|WBGene00004469	100	4.8e-153	175628	rps-0	GO:0000461	endonucleolytic cleavage to generate mature 3'-end of SSU-rRNA from (SSU-rRNA, 5.8S rRNA, LSU-rRNA)	biological_process	13
TRINITY_DN15731_c0_g2	WB|WBGene00004469	100	4.8e-153	175628	rps-0	GO:0003735	structural constituent of ribosome	molecular_function	4
TRINITY_DN15731_c0_g2	WB|WBGene00004469	100	4.8e-153	175628	rps-0	GO:0005515	protein binding	molecular_function	4
TRINITY_DN15731_c0_g2	WB|WBGene00004469	100	4.8e-153	175628	rps-0	GO:0005622	intracellular	cellular_component	4
TRINITY_DN15731_c0_g2	WB|WBGene00004469	100	4.8e-153	175628	rps-0	GO:0005737	cytoplasm	cellular_component	5
TRINITY_DN15731_c0_g2	WB|WBGene00004469	100	4.8e-153	175628	rps-0	GO:0005840	ribosome	cellular_component	6
TRINITY_DN15731_c0_g2	WB|WBGene00004469	100	4.8e-153	175628	rps-0	GO:0006407	rRNA export from nucleus	biological_process	11
TRINITY_DN15731_c0_g2	WB|WBGene00004469	100	4.8e-153	175628	rps-0	GO:0006412	translation	biological_process	8
TRINITY_DN15731_c0_g2	WB|WBGene00004469	100	4.8e-153	175628	rps-0	GO:0015935	small ribosomal subunit	cellular_component	7
TRINITY_DN15731_c0_g2	WB|WBGene00004469	100	4.8e-153	175628	rps-0	GO:0022627	cytosolic small ribosomal subunit	cellular_component	8
TRINITY_DN15731_c0_g2	WB|WBGene00004469	100	4.8e-153	175628	rps-0	GO:0030686	90S preribosome	cellular_component	6
TRINITY_DN15789_c0_g1	UNIPROTKB|D0MZQ3	96.4	8.5e-56	9464639	PITG_03235	GO:0002181	cytoplasmic translation	biological_process	9
TRINITY_DN15789_c0_g1	UNIPROTKB|D0MZQ3	96.4	8.5e-56	9464639	PITG_03235	GO:0003735	structural constituent of ribosome	molecular_function	4
TRINITY_DN15789_c0_g1	UNIPROTKB|D0MZQ3	96.4	8.5e-56	9464639	PITG_03235	GO:0022625	cytosolic large ribosomal subunit	cellular_component	8
TRINITY_DN15789_c0_g1	UNIPROTKB|D0MZQ3	96.4	8.5e-56	9464639	PITG_03235	GO:0042273	ribosomal large subunit biogenesis	biological_process	6
TRINITY_DN15789_c0_g2	MGI|MGI:1276558	100	2.7e-21	20500	Slc13a2	GO:0005215	transporter activity	molecular_function	3
TRINITY_DN15789_c0_g2	MGI|MGI:1276558	100	2.7e-21	20500	Slc13a2	GO:0005887	integral component of plasma membrane	cellular_component	6
TRINITY_DN15789_c0_g2	MGI|MGI:1276558	100	2.7e-21	20500	Slc13a2	GO:0006811	ion transport	biological_process	6
TRINITY_DN15789_c0_g2	MGI|MGI:1276558	100	2.7e-21	20500	Slc13a2	GO:0006814	sodium ion transport	biological_process	9
TRINITY_DN15789_c0_g2	MGI|MGI:1276558	100	2.7e-21	20500	Slc13a2	GO:0015293	symporter activity	molecular_function	7
TRINITY_DN15789_c0_g2	MGI|MGI:1276558	100	2.7e-21	20500	Slc13a2	GO:0016020	membrane	cellular_component	3
TRINITY_DN15789_c0_g2	MGI|MGI:1276558	100	2.7e-21	20500	Slc13a2	GO:0016021	integral component of membrane	cellular_component	5
TRINITY_DN15789_c0_g2	MGI|MGI:1276558	100	2.7e-21	20500	Slc13a2	GO:0055085	transmembrane transport	biological_process	6
TRINITY_DN15789_c0_g2	MGI|MGI:1276558	100	2.7e-21	20500	Slc13a2	GO:0098656	anion transmembrane transport	biological_process	8
TRINITY_DN15812_c0_g1	MGI|MGI:96021	100	1.6e-33	100503605	Hbb-b1	GO:0005344	oxygen carrier activity	molecular_function	4
TRINITY_DN15812_c0_g1	MGI|MGI:96021	100	1.6e-33	100503605	Hbb-b1	GO:0005833	hemoglobin complex	cellular_component	4
TRINITY_DN15812_c0_g1	MGI|MGI:96021	100	1.6e-33	100503605	Hbb-b1	GO:0010999	regulation of eIF2 alpha phosphorylation by heme	biological_process	10
TRINITY_DN15812_c0_g1	MGI|MGI:96021	100	1.6e-33	100503605	Hbb-b1	GO:0015671	oxygen transport	biological_process	7
TRINITY_DN15812_c0_g1	MGI|MGI:96021	100	1.6e-33	100503605	Hbb-b1	GO:0030097	hemopoiesis	biological_process	7
TRINITY_DN15812_c0_g1	MGI|MGI:96021	100	1.6e-33	100503605	Hbb-b1	GO:0043209	myelin sheath	cellular_component	4
TRINITY_DN15812_c0_g1	MGI|MGI:96021	100	1.6e-33	100503605	Hbb-b1	GO:0048821	erythrocyte development	biological_process	7
TRINITY_DN15847_c0_g1	UNIPROTKB|B7PW84	86.2	2.2e-30	8032280	IscW_ISCW019676	GO:0004565	beta-galactosidase activity	molecular_function	8
TRINITY_DN15847_c0_g1	UNIPROTKB|B7PW84	86.2	2.2e-30	8032280	IscW_ISCW019676	GO:0005773	vacuole	cellular_component	6
TRINITY_DN16043_c0_g1	WB|WBGene00022336	100	8.6e-53	175299	Y82E9BR.3	GO:0000276	mitochondrial proton-transporting ATP synthase complex, coupling factor F(o)	cellular_component	7
TRINITY_DN16043_c0_g1	WB|WBGene00022336	100	8.6e-53	175299	Y82E9BR.3	GO:0005739	mitochondrion	cellular_component	6
TRINITY_DN16043_c0_g1	WB|WBGene00022336	100	8.6e-53	175299	Y82E9BR.3	GO:0006810	transport	biological_process	5
TRINITY_DN16043_c0_g1	WB|WBGene00022336	100	8.6e-53	175299	Y82E9BR.3	GO:0006811	ion transport	biological_process	6
TRINITY_DN16043_c0_g1	WB|WBGene00022336	100	8.6e-53	175299	Y82E9BR.3	GO:0008289	lipid binding	molecular_function	4
TRINITY_DN16043_c0_g1	WB|WBGene00022336	100	8.6e-53	175299	Y82E9BR.3	GO:0015078	proton transmembrane transporter activity	molecular_function	9
TRINITY_DN16043_c0_g1	WB|WBGene00022336	100	8.6e-53	175299	Y82E9BR.3	GO:0015986	ATP synthesis coupled proton transport	biological_process	13
TRINITY_DN16043_c0_g1	WB|WBGene00022336	100	8.6e-53	175299	Y82E9BR.3	GO:0015991	ATP hydrolysis coupled proton transport	biological_process	11
TRINITY_DN16043_c0_g1	WB|WBGene00022336	100	8.6e-53	175299	Y82E9BR.3	GO:0016020	membrane	cellular_component	3
TRINITY_DN16043_c0_g1	WB|WBGene00022336	100	8.6e-53	175299	Y82E9BR.3	GO:0016021	integral component of membrane	cellular_component	5
TRINITY_DN16043_c0_g1	WB|WBGene00022336	100	8.6e-53	175299	Y82E9BR.3	GO:0031966	mitochondrial membrane	cellular_component	5
TRINITY_DN16043_c0_g1	WB|WBGene00022336	100	8.6e-53	175299	Y82E9BR.3	GO:0033177	proton-transporting two-sector ATPase complex, proton-transporting domain	cellular_component	5
TRINITY_DN16043_c0_g1	WB|WBGene00022336	100	8.6e-53	175299	Y82E9BR.3	GO:0045263	proton-transporting ATP synthase complex, coupling factor F(o)	cellular_component	6
TRINITY_DN16043_c0_g1	WB|WBGene00022336	100	8.6e-53	175299	Y82E9BR.3	GO:0046933	proton-transporting ATP synthase activity, rotational mechanism	molecular_function	10
TRINITY_DN1608_c0_g1	UNIPROTKB|Q7QDV4	82.9	3.1e-24	1272602	AgaP_AGAP010436	GO:0004016	adenylate cyclase activity	molecular_function	5
TRINITY_DN1608_c0_g1	UNIPROTKB|Q7QDV4	82.9	3.1e-24	1272602	AgaP_AGAP010436	GO:0005886	plasma membrane	cellular_component	4
TRINITY_DN1608_c0_g1	UNIPROTKB|Q7QDV4	82.9	3.1e-24	1272602	AgaP_AGAP010436	GO:0006171	cAMP biosynthetic process	biological_process	12
TRINITY_DN1608_c0_g1	UNIPROTKB|Q7QDV4	82.9	3.1e-24	1272602	AgaP_AGAP010436	GO:0007189	adenylate cyclase-activating G-protein coupled receptor signaling pathway	biological_process	8
TRINITY_DN1608_c0_g1	UNIPROTKB|Q7QDV4	82.9	3.1e-24	1272602	AgaP_AGAP010436	GO:0007193	adenylate cyclase-inhibiting G-protein coupled receptor signaling pathway	biological_process	8
TRINITY_DN1608_c0_g1	UNIPROTKB|Q7QDV4	82.9	3.1e-24	1272602	AgaP_AGAP010436	GO:0019933	cAMP-mediated signaling	biological_process	8
TRINITY_DN1614_c0_g1	WB|WBGene00004417	100	1.3e-119	176015	rpl-6	GO:0000027	ribosomal large subunit assembly	biological_process	9
TRINITY_DN1614_c0_g1	WB|WBGene00004417	100	1.3e-119	176015	rpl-6	GO:0002181	cytoplasmic translation	biological_process	9
TRINITY_DN1614_c0_g1	WB|WBGene00004417	100	1.3e-119	176015	rpl-6	GO:0003723	RNA binding	molecular_function	6
TRINITY_DN1614_c0_g1	WB|WBGene00004417	100	1.3e-119	176015	rpl-6	GO:0003735	structural constituent of ribosome	molecular_function	4
TRINITY_DN1614_c0_g1	WB|WBGene00004417	100	1.3e-119	176015	rpl-6	GO:0005515	protein binding	molecular_function	4
TRINITY_DN1614_c0_g1	WB|WBGene00004417	100	1.3e-119	176015	rpl-6	GO:0005622	intracellular	cellular_component	4
TRINITY_DN1614_c0_g1	WB|WBGene00004417	100	1.3e-119	176015	rpl-6	GO:0005840	ribosome	cellular_component	6
TRINITY_DN1614_c0_g1	WB|WBGene00004417	100	1.3e-119	176015	rpl-6	GO:0006412	translation	biological_process	8
TRINITY_DN1614_c0_g1	WB|WBGene00004417	100	1.3e-119	176015	rpl-6	GO:0008340	determination of adult lifespan	biological_process	4
TRINITY_DN1614_c0_g1	WB|WBGene00004417	100	1.3e-119	176015	rpl-6	GO:0022625	cytosolic large ribosomal subunit	cellular_component	8
TRINITY_DN1663_c0_g1	TAIR|locus:2064212	70.7	5.5e-23	818436	LP1	GO:0005516	calmodulin binding	molecular_function	5
TRINITY_DN1663_c0_g1	TAIR|locus:2064212	70.7	5.5e-23	818436	LP1	GO:0005576	extracellular region	cellular_component	3
TRINITY_DN1663_c0_g1	TAIR|locus:2064212	70.7	5.5e-23	818436	LP1	GO:0005886	plasma membrane	cellular_component	4
TRINITY_DN1663_c0_g1	TAIR|locus:2064212	70.7	5.5e-23	818436	LP1	GO:0006869	lipid transport	biological_process	7
TRINITY_DN1663_c0_g1	TAIR|locus:2064212	70.7	5.5e-23	818436	LP1	GO:0008289	lipid binding	molecular_function	4
TRINITY_DN1663_c0_g1	TAIR|locus:2064212	70.7	5.5e-23	818436	LP1	GO:0009505	plant-type cell wall	cellular_component	6
TRINITY_DN1663_c0_g1	TAIR|locus:2064212	70.7	5.5e-23	818436	LP1	GO:0009534	chloroplast thylakoid	cellular_component	7
TRINITY_DN1663_c0_g1	TAIR|locus:2064212	70.7	5.5e-23	818436	LP1	GO:0048046	apoplast	cellular_component	4
TRINITY_DN1663_c0_g1	TAIR|locus:2064212	70.7	5.5e-23	818436	LP1	GO:0071555	cell wall organization	biological_process	6
TRINITY_DN1671_c0_g1	UNIPROTKB|A5GZA7	71.9	5.6e-95	395942	PAX7	GO:0005634	nucleus	cellular_component	6
TRINITY_DN1671_c0_g1	UNIPROTKB|A5GZA7	71.9	5.6e-95	395942	PAX7	GO:0006338	chromatin remodeling	biological_process	6
TRINITY_DN1671_c0_g1	UNIPROTKB|A5GZA7	71.9	5.6e-95	395942	PAX7	GO:0006351	transcription, DNA-templated	biological_process	8
TRINITY_DN1671_c0_g1	UNIPROTKB|A5GZA7	71.9	5.6e-95	395942	PAX7	GO:0010453	regulation of cell fate commitment	biological_process	7
TRINITY_DN1671_c0_g1	UNIPROTKB|A5GZA7	71.9	5.6e-95	395942	PAX7	GO:0014813	skeletal muscle satellite cell commitment	biological_process	6
TRINITY_DN1671_c0_g1	UNIPROTKB|A5GZA7	71.9	5.6e-95	395942	PAX7	GO:0021527	spinal cord association neuron differentiation	biological_process	7
TRINITY_DN1671_c0_g1	UNIPROTKB|A5GZA7	71.9	5.6e-95	395942	PAX7	GO:0021904	dorsal/ventral neural tube patterning	biological_process	7
TRINITY_DN1671_c0_g1	UNIPROTKB|A5GZA7	71.9	5.6e-95	395942	PAX7	GO:0031062	positive regulation of histone methylation	biological_process	11
TRINITY_DN1671_c0_g1	UNIPROTKB|A5GZA7	71.9	5.6e-95	395942	PAX7	GO:0043393	regulation of protein binding	biological_process	6
TRINITY_DN1671_c0_g1	UNIPROTKB|A5GZA7	71.9	5.6e-95	395942	PAX7	GO:0043403	skeletal muscle tissue regeneration	biological_process	7
TRINITY_DN1671_c0_g1	UNIPROTKB|A5GZA7	71.9	5.6e-95	395942	PAX7	GO:0043565	sequence-specific DNA binding	molecular_function	7
TRINITY_DN1671_c0_g1	UNIPROTKB|A5GZA7	71.9	5.6e-95	395942	PAX7	GO:0045944	positive regulation of transcription by RNA polymerase II	biological_process	10
TRINITY_DN1671_c0_g1	UNIPROTKB|A5GZA7	71.9	5.6e-95	395942	PAX7	GO:0048663	neuron fate commitment	biological_process	6
TRINITY_DN1671_c0_g1	UNIPROTKB|A5GZA7	71.9	5.6e-95	395942	PAX7	GO:0048706	embryonic skeletal system development	biological_process	7
TRINITY_DN1671_c0_g1	UNIPROTKB|A5GZA7	71.9	5.6e-95	395942	PAX7	GO:0051216	cartilage development	biological_process	6
TRINITY_DN1671_c0_g1	UNIPROTKB|A5GZA7	71.9	5.6e-95	395942	PAX7	GO:0060415	muscle tissue morphogenesis	biological_process	6
TRINITY_DN1671_c0_g1	UNIPROTKB|A5GZA7	71.9	5.6e-95	395942	PAX7	GO:2000288	positive regulation of myoblast proliferation	biological_process	8
TRINITY_DN16851_c0_g1	FB|FBgn0003499	89	8.4e-38	42162	sr	GO:0003676	nucleic acid binding	molecular_function	5
TRINITY_DN16851_c0_g1	FB|FBgn0003499	89	8.4e-38	42162	sr	GO:0006909	phagocytosis	biological_process	7
TRINITY_DN16851_c0_g1	FB|FBgn0003499	89	8.4e-38	42162	sr	GO:0007390	germ-band shortening	biological_process	6
TRINITY_DN16851_c0_g1	FB|FBgn0003499	89	8.4e-38	42162	sr	GO:0007398	ectoderm development	biological_process	6
TRINITY_DN16851_c0_g1	FB|FBgn0003499	89	8.4e-38	42162	sr	GO:0007417	central nervous system development	biological_process	6
TRINITY_DN16851_c0_g1	FB|FBgn0003499	89	8.4e-38	42162	sr	GO:0007427	epithelial cell migration, open tracheal system	biological_process	9
TRINITY_DN16851_c0_g1	FB|FBgn0003499	89	8.4e-38	42162	sr	GO:0007517	muscle organ development	biological_process	6
TRINITY_DN16851_c0_g1	FB|FBgn0003499	89	8.4e-38	42162	sr	GO:0007525	somatic muscle development	biological_process	6
TRINITY_DN16851_c0_g1	FB|FBgn0003499	89	8.4e-38	42162	sr	GO:0010906	regulation of glucose metabolic process	biological_process	9
TRINITY_DN16851_c0_g1	FB|FBgn0003499	89	8.4e-38	42162	sr	GO:0016204	determination of muscle attachment site	biological_process	6
TRINITY_DN16851_c0_g1	FB|FBgn0003499	89	8.4e-38	42162	sr	GO:0042440	pigment metabolic process	biological_process	4
TRINITY_DN16905_c0_g2	WB|WBGene00004426	100	6e-64	172818	rpl-14	GO:0003723	RNA binding	molecular_function	6
TRINITY_DN16905_c0_g2	WB|WBGene00004426	100	6e-64	172818	rpl-14	GO:0003735	structural constituent of ribosome	molecular_function	4
TRINITY_DN16905_c0_g2	WB|WBGene00004426	100	6e-64	172818	rpl-14	GO:0005622	intracellular	cellular_component	4
TRINITY_DN16905_c0_g2	WB|WBGene00004426	100	6e-64	172818	rpl-14	GO:0005840	ribosome	cellular_component	6
TRINITY_DN16905_c0_g2	WB|WBGene00004426	100	6e-64	172818	rpl-14	GO:0006412	translation	biological_process	8
TRINITY_DN16905_c0_g2	WB|WBGene00004426	100	6e-64	172818	rpl-14	GO:0022625	cytosolic large ribosomal subunit	cellular_component	8
TRINITY_DN16905_c0_g2	WB|WBGene00004426	100	6e-64	172818	rpl-14	GO:0042273	ribosomal large subunit biogenesis	biological_process	6
TRINITY_DN16962_c0_g1	GENEDB|PF3D7_0813300	45.1	2.6e-14	2655446	PF3D7_0813300	GO:0020020	food vacuole	cellular_component	11
TRINITY_DN17219_c0_g1	UNIPROTKB|A4D0T7	66.7	1.9e-06	-	LINC00998	GO:0016021	integral component of membrane	cellular_component	5
TRINITY_DN17300_c0_g1	UNIPROTKB|P01040	99	2.5e-49	1475	CSTA	GO:0001533	cornified envelope	cellular_component	5
TRINITY_DN17300_c0_g1	UNIPROTKB|P01040	99	2.5e-49	1475	CSTA	GO:0002020	protease binding	molecular_function	6
TRINITY_DN17300_c0_g1	UNIPROTKB|P01040	99	2.5e-49	1475	CSTA	GO:0004869	cysteine-type endopeptidase inhibitor activity	molecular_function	8
TRINITY_DN17300_c0_g1	UNIPROTKB|P01040	99	2.5e-49	1475	CSTA	GO:0005198	structural molecule activity	molecular_function	3
TRINITY_DN17300_c0_g1	UNIPROTKB|P01040	99	2.5e-49	1475	CSTA	GO:0005615	extracellular space	cellular_component	4
TRINITY_DN17300_c0_g1	UNIPROTKB|P01040	99	2.5e-49	1475	CSTA	GO:0005634	nucleus	cellular_component	6
TRINITY_DN17300_c0_g1	UNIPROTKB|P01040	99	2.5e-49	1475	CSTA	GO:0005737	cytoplasm	cellular_component	5
TRINITY_DN17300_c0_g1	UNIPROTKB|P01040	99	2.5e-49	1475	CSTA	GO:0005829	cytosol	cellular_component	6
TRINITY_DN17300_c0_g1	UNIPROTKB|P01040	99	2.5e-49	1475	CSTA	GO:0010466	negative regulation of peptidase activity	biological_process	10
TRINITY_DN17300_c0_g1	UNIPROTKB|P01040	99	2.5e-49	1475	CSTA	GO:0010951	negative regulation of endopeptidase activity	biological_process	11
TRINITY_DN17300_c0_g1	UNIPROTKB|P01040	99	2.5e-49	1475	CSTA	GO:0018149	peptide cross-linking	biological_process	9
TRINITY_DN17300_c0_g1	UNIPROTKB|P01040	99	2.5e-49	1475	CSTA	GO:0030216	keratinocyte differentiation	biological_process	8
TRINITY_DN17300_c0_g1	UNIPROTKB|P01040	99	2.5e-49	1475	CSTA	GO:0030674	protein binding, bridging	molecular_function	5
TRINITY_DN17300_c0_g1	UNIPROTKB|P01040	99	2.5e-49	1475	CSTA	GO:0045861	negative regulation of proteolysis	biological_process	9
TRINITY_DN17300_c0_g1	UNIPROTKB|P01040	99	2.5e-49	1475	CSTA	GO:0070062	extracellular exosome	cellular_component	7
TRINITY_DN17300_c0_g1	UNIPROTKB|P01040	99	2.5e-49	1475	CSTA	GO:0070268	cornification	biological_process	6
TRINITY_DN17390_c0_g1	UNIPROTKB|F1PKT8	40	5.3e-12	-	CYP27A1	GO:0004497	monooxygenase activity	molecular_function	5
TRINITY_DN17390_c0_g1	UNIPROTKB|F1PKT8	40	5.3e-12	-	CYP27A1	GO:0005506	iron ion binding	molecular_function	8
TRINITY_DN17390_c0_g1	UNIPROTKB|F1PKT8	40	5.3e-12	-	CYP27A1	GO:0005743	mitochondrial inner membrane	cellular_component	6
TRINITY_DN17390_c0_g1	UNIPROTKB|F1PKT8	40	5.3e-12	-	CYP27A1	GO:0016705	oxidoreductase activity, acting on paired donors, with incorporation or reduction of molecular oxygen	molecular_function	5
TRINITY_DN17390_c0_g1	UNIPROTKB|F1PKT8	40	5.3e-12	-	CYP27A1	GO:0020037	heme binding	molecular_function	6
TRINITY_DN17390_c0_g1	UNIPROTKB|F1PKT8	40	5.3e-12	-	CYP27A1	GO:0055114	oxidation-reduction process	biological_process	4
TRINITY_DN1741_c0_g1	ASPGD|ASPL0000237208	68.5	4e-27	4981160	An06g01610	GO:0005634	nucleus	cellular_component	6
TRINITY_DN1741_c0_g1	ASPGD|ASPL0000237208	68.5	4e-27	4981160	An06g01610	GO:0005768	endosome	cellular_component	7
TRINITY_DN1741_c0_g1	ASPGD|ASPL0000237208	68.5	4e-27	4981160	An06g01610	GO:0005829	cytosol	cellular_component	6
TRINITY_DN1741_c0_g1	ASPGD|ASPL0000237208	68.5	4e-27	4981160	An06g01610	GO:0005886	plasma membrane	cellular_component	4
TRINITY_DN1741_c0_g1	ASPGD|ASPL0000237208	68.5	4e-27	4981160	An06g01610	GO:0007009	plasma membrane organization	biological_process	6
TRINITY_DN1741_c0_g1	ASPGD|ASPL0000237208	68.5	4e-27	4981160	An06g01610	GO:0007155	cell adhesion	biological_process	4
TRINITY_DN1741_c0_g1	ASPGD|ASPL0000237208	68.5	4e-27	4981160	An06g01610	GO:0008289	lipid binding	molecular_function	4
TRINITY_DN1741_c0_g1	ASPGD|ASPL0000237208	68.5	4e-27	4981160	An06g01610	GO:0010972	negative regulation of G2/M transition of mitotic cell cycle	biological_process	10
TRINITY_DN1741_c0_g1	ASPGD|ASPL0000237208	68.5	4e-27	4981160	An06g01610	GO:0030445	yeast-form cell wall	cellular_component	7
TRINITY_DN1741_c0_g1	ASPGD|ASPL0000237208	68.5	4e-27	4981160	An06g01610	GO:0030446	hyphal cell wall	cellular_component	7
TRINITY_DN1741_c0_g1	ASPGD|ASPL0000237208	68.5	4e-27	4981160	An06g01610	GO:0034599	cellular response to oxidative stress	biological_process	6
TRINITY_DN1741_c0_g1	ASPGD|ASPL0000237208	68.5	4e-27	4981160	An06g01610	GO:0034605	cellular response to heat	biological_process	6
TRINITY_DN1741_c0_g1	ASPGD|ASPL0000237208	68.5	4e-27	4981160	An06g01610	GO:0071470	cellular response to osmotic stress	biological_process	6
TRINITY_DN1741_c0_g1	ASPGD|ASPL0000237208	68.5	4e-27	4981160	An06g01610	GO:1903614	negative regulation of protein tyrosine phosphatase activity	biological_process	13
TRINITY_DN17444_c0_g1	TAIR|locus:2088867	94.5	1.8e-40	822259	TIP2	GO:0005737	cytoplasm	cellular_component	5
TRINITY_DN17444_c0_g1	TAIR|locus:2088867	94.5	1.8e-40	822259	TIP2	GO:0005773	vacuole	cellular_component	6
TRINITY_DN17444_c0_g1	TAIR|locus:2088867	94.5	1.8e-40	822259	TIP2	GO:0005774	vacuolar membrane	cellular_component	7
TRINITY_DN17444_c0_g1	TAIR|locus:2088867	94.5	1.8e-40	822259	TIP2	GO:0005783	endoplasmic reticulum	cellular_component	6
TRINITY_DN17444_c0_g1	TAIR|locus:2088867	94.5	1.8e-40	822259	TIP2	GO:0005794	Golgi apparatus	cellular_component	6
TRINITY_DN17444_c0_g1	TAIR|locus:2088867	94.5	1.8e-40	822259	TIP2	GO:0005886	plasma membrane	cellular_component	4
TRINITY_DN17444_c0_g1	TAIR|locus:2088867	94.5	1.8e-40	822259	TIP2	GO:0005887	integral component of plasma membrane	cellular_component	6
TRINITY_DN17444_c0_g1	TAIR|locus:2088867	94.5	1.8e-40	822259	TIP2	GO:0006810	transport	biological_process	5
TRINITY_DN17444_c0_g1	TAIR|locus:2088867	94.5	1.8e-40	822259	TIP2	GO:0009507	chloroplast	cellular_component	7
TRINITY_DN17444_c0_g1	TAIR|locus:2088867	94.5	1.8e-40	822259	TIP2	GO:0009705	plant-type vacuole membrane	cellular_component	8
TRINITY_DN17444_c0_g1	TAIR|locus:2088867	94.5	1.8e-40	822259	TIP2	GO:0015250	water channel activity	molecular_function	7
TRINITY_DN17444_c0_g1	TAIR|locus:2088867	94.5	1.8e-40	822259	TIP2	GO:0016020	membrane	cellular_component	3
TRINITY_DN17444_c0_g1	TAIR|locus:2088867	94.5	1.8e-40	822259	TIP2	GO:0030104	water homeostasis	biological_process	7
TRINITY_DN17444_c0_g1	TAIR|locus:2088867	94.5	1.8e-40	822259	TIP2	GO:0034220	ion transmembrane transport	biological_process	7
TRINITY_DN17444_c0_g1	TAIR|locus:2088867	94.5	1.8e-40	822259	TIP2	GO:0042742	defense response to bacterium	biological_process	8
TRINITY_DN17444_c0_g1	TAIR|locus:2088867	94.5	1.8e-40	822259	TIP2	GO:0042807	central vacuole	cellular_component	8
TRINITY_DN17444_c0_g1	TAIR|locus:2088867	94.5	1.8e-40	822259	TIP2	GO:0043674	columella	cellular_component	5
TRINITY_DN17444_c0_g1	TAIR|locus:2088867	94.5	1.8e-40	822259	TIP2	GO:0080170	hydrogen peroxide transmembrane transport	biological_process	8
TRINITY_DN17482_c0_g1	ASPGD|ASPL0000053041	78.9	9.8e-21	-	ccgA	GO:0003674	molecular_function	molecular_function	2
TRINITY_DN17482_c0_g1	ASPGD|ASPL0000053041	78.9	9.8e-21	-	ccgA	GO:0005575	cellular_component	cellular_component	2
TRINITY_DN17482_c0_g1	ASPGD|ASPL0000053041	78.9	9.8e-21	-	ccgA	GO:0008150	biological_process	biological_process	2
TRINITY_DN17585_c1_g1	UNIPROTKB|A0A0A0MTN3	100	1.3e-33	-	GSTM3	GO:0004364	glutathione transferase activity	molecular_function	6
TRINITY_DN17585_c1_g1	UNIPROTKB|A0A0A0MTN3	100	1.3e-33	-	GSTM3	GO:0008152	metabolic process	biological_process	3
TRINITY_DN17761_c1_g1	UNIPROTKB|Q90703	100	2.6e-44	395807	NOS2	GO:0004517	nitric-oxide synthase activity	molecular_function	7
TRINITY_DN17761_c1_g1	UNIPROTKB|Q90703	100	2.6e-44	395807	NOS2	GO:0005516	calmodulin binding	molecular_function	5
TRINITY_DN17761_c1_g1	UNIPROTKB|Q90703	100	2.6e-44	395807	NOS2	GO:0005622	intracellular	cellular_component	4
TRINITY_DN17761_c1_g1	UNIPROTKB|Q90703	100	2.6e-44	395807	NOS2	GO:0006809	nitric oxide biosynthetic process	biological_process	8
TRINITY_DN17761_c1_g1	UNIPROTKB|Q90703	100	2.6e-44	395807	NOS2	GO:0006954	inflammatory response	biological_process	6
TRINITY_DN17761_c1_g1	UNIPROTKB|Q90703	100	2.6e-44	395807	NOS2	GO:0007263	nitric oxide mediated signal transduction	biological_process	7
TRINITY_DN17761_c1_g1	UNIPROTKB|Q90703	100	2.6e-44	395807	NOS2	GO:0010181	FMN binding	molecular_function	7
TRINITY_DN17761_c1_g1	UNIPROTKB|Q90703	100	2.6e-44	395807	NOS2	GO:0018119	peptidyl-cysteine S-nitrosylation	biological_process	10
TRINITY_DN17761_c1_g1	UNIPROTKB|Q90703	100	2.6e-44	395807	NOS2	GO:0031284	positive regulation of guanylate cyclase activity	biological_process	8
TRINITY_DN17761_c1_g1	UNIPROTKB|Q90703	100	2.6e-44	395807	NOS2	GO:0032310	prostaglandin secretion	biological_process	10
TRINITY_DN17761_c1_g1	UNIPROTKB|Q90703	100	2.6e-44	395807	NOS2	GO:0042742	defense response to bacterium	biological_process	8
TRINITY_DN17761_c1_g1	UNIPROTKB|Q90703	100	2.6e-44	395807	NOS2	GO:0045776	negative regulation of blood pressure	biological_process	6
TRINITY_DN17761_c1_g1	UNIPROTKB|Q90703	100	2.6e-44	395807	NOS2	GO:0046872	metal ion binding	molecular_function	6
TRINITY_DN17761_c1_g1	UNIPROTKB|Q90703	100	2.6e-44	395807	NOS2	GO:0055114	oxidation-reduction process	biological_process	4
TRINITY_DN17761_c1_g1	UNIPROTKB|Q90703	100	2.6e-44	395807	NOS2	GO:0072604	interleukin-6 secretion	biological_process	12
TRINITY_DN17761_c1_g1	UNIPROTKB|Q90703	100	2.6e-44	395807	NOS2	GO:0072606	interleukin-8 secretion	biological_process	12
TRINITY_DN17761_c1_g1	UNIPROTKB|Q90703	100	2.6e-44	395807	NOS2	GO:1900015	regulation of cytokine production involved in inflammatory response	biological_process	7
TRINITY_DN18066_c0_g1	MGI|MGI:107460	96.5	2.5e-47	110323	Cox6b1	GO:0005739	mitochondrion	cellular_component	6
TRINITY_DN18066_c0_g1	MGI|MGI:107460	96.5	2.5e-47	110323	Cox6b1	GO:0005743	mitochondrial inner membrane	cellular_component	6
TRINITY_DN18132_c0_g1	FB|FBgn0030592	38	5e-10	32418	CG9514	GO:0016491	oxidoreductase activity	molecular_function	4
TRINITY_DN18132_c0_g1	FB|FBgn0030592	38	5e-10	32418	CG9514	GO:0016614	oxidoreductase activity, acting on CH-OH group of donors	molecular_function	5
TRINITY_DN18132_c0_g1	FB|FBgn0030592	38	5e-10	32418	CG9514	GO:0045455	ecdysteroid metabolic process	biological_process	7
TRINITY_DN18132_c0_g1	FB|FBgn0030592	38	5e-10	32418	CG9514	GO:0050660	flavin adenine dinucleotide binding	molecular_function	6
TRINITY_DN18132_c0_g1	FB|FBgn0030592	38	5e-10	32418	CG9514	GO:0055114	oxidation-reduction process	biological_process	4
TRINITY_DN1815_c0_g1	UNIPROTKB|Q8SEW8	85.8	5.6e-113	804658	MT-CO3	GO:0045277	respiratory chain complex IV	cellular_component	5
TRINITY_DN18192_c0_g2	MGI|MGI:102499	91.7	2.5e-44	17718	mt-Nd3	GO:0005739	mitochondrion	cellular_component	6
TRINITY_DN18192_c0_g2	MGI|MGI:102499	91.7	2.5e-44	17718	mt-Nd3	GO:0005747	mitochondrial respiratory chain complex I	cellular_component	7
TRINITY_DN18192_c0_g2	MGI|MGI:102499	91.7	2.5e-44	17718	mt-Nd3	GO:0006979	response to oxidative stress	biological_process	5
TRINITY_DN18192_c0_g2	MGI|MGI:102499	91.7	2.5e-44	17718	mt-Nd3	GO:0008137	NADH dehydrogenase (ubiquinone) activity	molecular_function	8
TRINITY_DN18192_c0_g2	MGI|MGI:102499	91.7	2.5e-44	17718	mt-Nd3	GO:0009725	response to hormone	biological_process	5
TRINITY_DN18192_c0_g2	MGI|MGI:102499	91.7	2.5e-44	17718	mt-Nd3	GO:0016020	membrane	cellular_component	3
TRINITY_DN18192_c0_g2	MGI|MGI:102499	91.7	2.5e-44	17718	mt-Nd3	GO:0016021	integral component of membrane	cellular_component	5
TRINITY_DN18192_c0_g2	MGI|MGI:102499	91.7	2.5e-44	17718	mt-Nd3	GO:0016491	oxidoreductase activity	molecular_function	4
TRINITY_DN18192_c0_g2	MGI|MGI:102499	91.7	2.5e-44	17718	mt-Nd3	GO:0030964	NADH dehydrogenase complex	cellular_component	5
TRINITY_DN18192_c0_g2	MGI|MGI:102499	91.7	2.5e-44	17718	mt-Nd3	GO:0055114	oxidation-reduction process	biological_process	4
TRINITY_DN18192_c0_g2	MGI|MGI:102499	91.7	2.5e-44	17718	mt-Nd3	GO:0070469	respiratory chain	cellular_component	4
TRINITY_DN18192_c0_g2	MGI|MGI:102499	91.7	2.5e-44	17718	mt-Nd3	GO:0071385	cellular response to glucocorticoid stimulus	biological_process	9
TRINITY_DN18511_c0_g1	UNIPROTKB|D0MWZ9	96.7	5.8e-73	9476645	PITG_02694	GO:0000027	ribosomal large subunit assembly	biological_process	9
TRINITY_DN18511_c0_g1	UNIPROTKB|D0MWZ9	96.7	5.8e-73	9476645	PITG_02694	GO:0003735	structural constituent of ribosome	molecular_function	4
TRINITY_DN18511_c0_g1	UNIPROTKB|D0MWZ9	96.7	5.8e-73	9476645	PITG_02694	GO:0006412	translation	biological_process	8
TRINITY_DN18511_c0_g1	UNIPROTKB|D0MWZ9	96.7	5.8e-73	9476645	PITG_02694	GO:0022625	cytosolic large ribosomal subunit	cellular_component	8
TRINITY_DN18522_c0_g2	UNIPROTKB|B7P8Q2	38	2.7e-14	8026244	IscW_ISCW017301	GO:0006869	lipid transport	biological_process	7
TRINITY_DN18522_c0_g2	UNIPROTKB|B7P8Q2	38	2.7e-14	8026244	IscW_ISCW017301	GO:0042626	ATPase activity, coupled to transmembrane movement of substances	molecular_function	8
TRINITY_DN18522_c0_g2	UNIPROTKB|B7P8Q2	38	2.7e-14	8026244	IscW_ISCW017301	GO:0043231	intracellular membrane-bounded organelle	cellular_component	5
TRINITY_DN18622_c0_g1	UNIPROTKB|P07919	98.9	1.9e-37	7388	UQCRH	GO:0005515	protein binding	molecular_function	4
TRINITY_DN18622_c0_g1	UNIPROTKB|P07919	98.9	1.9e-37	7388	UQCRH	GO:0005739	mitochondrion	cellular_component	6
TRINITY_DN18622_c0_g1	UNIPROTKB|P07919	98.9	1.9e-37	7388	UQCRH	GO:0005743	mitochondrial inner membrane	cellular_component	6
TRINITY_DN18622_c0_g1	UNIPROTKB|P07919	98.9	1.9e-37	7388	UQCRH	GO:0005746	mitochondrial respiratory chain	cellular_component	5
TRINITY_DN18622_c0_g1	UNIPROTKB|P07919	98.9	1.9e-37	7388	UQCRH	GO:0006119	oxidative phosphorylation	biological_process	6
TRINITY_DN18622_c0_g1	UNIPROTKB|P07919	98.9	1.9e-37	7388	UQCRH	GO:0006122	mitochondrial electron transport, ubiquinol to cytochrome c	biological_process	8
TRINITY_DN18622_c0_g1	UNIPROTKB|P07919	98.9	1.9e-37	7388	UQCRH	GO:0008121	ubiquinol-cytochrome-c reductase activity	molecular_function	6
TRINITY_DN18622_c0_g1	UNIPROTKB|P07919	98.9	1.9e-37	7388	UQCRH	GO:0009060	aerobic respiration	biological_process	8
TRINITY_DN18622_c0_g1	UNIPROTKB|P07919	98.9	1.9e-37	7388	UQCRH	GO:0055114	oxidation-reduction process	biological_process	4
TRINITY_DN18622_c0_g1	UNIPROTKB|P07919	98.9	1.9e-37	7388	UQCRH	GO:1902600	proton transmembrane transport	biological_process	9
TRINITY_DN18795_c0_g1	TAIR|locus:2177406	77	1.5e-78	833830	RBCS1B	GO:0004497	monooxygenase activity	molecular_function	5
TRINITY_DN18795_c0_g1	TAIR|locus:2177406	77	1.5e-78	833830	RBCS1B	GO:0009507	chloroplast	cellular_component	7
TRINITY_DN18795_c0_g1	TAIR|locus:2177406	77	1.5e-78	833830	RBCS1B	GO:0009570	chloroplast stroma	cellular_component	8
TRINITY_DN18795_c0_g1	TAIR|locus:2177406	77	1.5e-78	833830	RBCS1B	GO:0009573	chloroplast ribulose bisphosphate carboxylase complex	cellular_component	8
TRINITY_DN18795_c0_g1	TAIR|locus:2177406	77	1.5e-78	833830	RBCS1B	GO:0009579	thylakoid	cellular_component	5
TRINITY_DN18795_c0_g1	TAIR|locus:2177406	77	1.5e-78	833830	RBCS1B	GO:0009637	response to blue light	biological_process	7
TRINITY_DN18795_c0_g1	TAIR|locus:2177406	77	1.5e-78	833830	RBCS1B	GO:0009853	photorespiration	biological_process	6
TRINITY_DN18795_c0_g1	TAIR|locus:2177406	77	1.5e-78	833830	RBCS1B	GO:0009941	chloroplast envelope	cellular_component	7
TRINITY_DN18795_c0_g1	TAIR|locus:2177406	77	1.5e-78	833830	RBCS1B	GO:0010114	response to red light	biological_process	8
TRINITY_DN18795_c0_g1	TAIR|locus:2177406	77	1.5e-78	833830	RBCS1B	GO:0010218	response to far red light	biological_process	8
TRINITY_DN18795_c0_g1	TAIR|locus:2177406	77	1.5e-78	833830	RBCS1B	GO:0015977	carbon fixation	biological_process	5
TRINITY_DN18795_c0_g1	TAIR|locus:2177406	77	1.5e-78	833830	RBCS1B	GO:0016020	membrane	cellular_component	3
TRINITY_DN18795_c0_g1	TAIR|locus:2177406	77	1.5e-78	833830	RBCS1B	GO:0016984	ribulose-bisphosphate carboxylase activity	molecular_function	7
TRINITY_DN18795_c0_g1	TAIR|locus:2177406	77	1.5e-78	833830	RBCS1B	GO:0019253	reductive pentose-phosphate cycle	biological_process	8
TRINITY_DN18795_c0_g1	TAIR|locus:2177406	77	1.5e-78	833830	RBCS1B	GO:0031969	chloroplast membrane	cellular_component	6
TRINITY_DN18795_c0_g1	TAIR|locus:2177406	77	1.5e-78	833830	RBCS1B	GO:0048046	apoplast	cellular_component	4
TRINITY_DN18795_c0_g1	TAIR|locus:2177406	77	1.5e-78	833830	RBCS1B	GO:0055114	oxidation-reduction process	biological_process	4
TRINITY_DN18819_c0_g1	UNIPROTKB|Q2LK96	100	2.3e-114	423630	LL	GO:0030246	carbohydrate binding	molecular_function	4
TRINITY_DN1889_c0_g1	UNIPROTKB|D0N9Z1	91.5	2.6e-34	9465826	PITG_07848	GO:0000209	protein polyubiquitination	biological_process	12
TRINITY_DN1889_c0_g1	UNIPROTKB|D0N9Z1	91.5	2.6e-34	9465826	PITG_07848	GO:0043161	proteasome-mediated ubiquitin-dependent protein catabolic process	biological_process	11
TRINITY_DN1889_c0_g1	UNIPROTKB|D0N9Z1	91.5	2.6e-34	9465826	PITG_07848	GO:0061630	ubiquitin protein ligase activity	molecular_function	7
TRINITY_DN18943_c0_g1	UNIPROTKB|F1NTT2	100	4e-31	768930	RPS28	GO:0003735	structural constituent of ribosome	molecular_function	4
TRINITY_DN18943_c0_g1	UNIPROTKB|F1NTT2	100	4e-31	768930	RPS28	GO:0006364	rRNA processing	biological_process	11
TRINITY_DN18943_c0_g1	UNIPROTKB|F1NTT2	100	4e-31	768930	RPS28	GO:0006407	rRNA export from nucleus	biological_process	11
TRINITY_DN18943_c0_g1	UNIPROTKB|F1NTT2	100	4e-31	768930	RPS28	GO:0006412	translation	biological_process	8
TRINITY_DN18943_c0_g1	UNIPROTKB|F1NTT2	100	4e-31	768930	RPS28	GO:0022627	cytosolic small ribosomal subunit	cellular_component	8
TRINITY_DN18943_c0_g1	UNIPROTKB|F1NTT2	100	4e-31	768930	RPS28	GO:0042274	ribosomal small subunit biogenesis	biological_process	6
TRINITY_DN18943_c0_g1	UNIPROTKB|F1NTT2	100	4e-31	768930	RPS28	GO:0070062	extracellular exosome	cellular_component	7
TRINITY_DN19022_c0_g1	UNIPROTKB|O24370	79.4	1.9e-26	102596122	LOX2.1	GO:0016165	linoleate 13S-lipoxygenase activity	molecular_function	7
TRINITY_DN19039_c0_g1	MGI|MGI:1916286	100	1.2e-92	69036	Zg16	GO:0003674	molecular_function	molecular_function	2
TRINITY_DN19039_c0_g1	MGI|MGI:1916286	100	1.2e-92	69036	Zg16	GO:0005576	extracellular region	cellular_component	3
TRINITY_DN19039_c0_g1	MGI|MGI:1916286	100	1.2e-92	69036	Zg16	GO:0005794	Golgi apparatus	cellular_component	6
TRINITY_DN19039_c0_g1	MGI|MGI:1916286	100	1.2e-92	69036	Zg16	GO:0005796	Golgi lumen	cellular_component	7
TRINITY_DN19039_c0_g1	MGI|MGI:1916286	100	1.2e-92	69036	Zg16	GO:0008150	biological_process	biological_process	2
TRINITY_DN19039_c0_g1	MGI|MGI:1916286	100	1.2e-92	69036	Zg16	GO:0015031	protein transport	biological_process	9
TRINITY_DN19039_c0_g1	MGI|MGI:1916286	100	1.2e-92	69036	Zg16	GO:0030246	carbohydrate binding	molecular_function	4
TRINITY_DN19039_c0_g1	MGI|MGI:1916286	100	1.2e-92	69036	Zg16	GO:0031012	extracellular matrix	cellular_component	4
TRINITY_DN19039_c0_g1	MGI|MGI:1916286	100	1.2e-92	69036	Zg16	GO:0031410	cytoplasmic vesicle	cellular_component	6
TRINITY_DN19039_c0_g1	MGI|MGI:1916286	100	1.2e-92	69036	Zg16	GO:0042589	zymogen granule membrane	cellular_component	8
TRINITY_DN19044_c0_g1	TAIR|locus:505006351	57.1	3.9e-07	820771	MT3	GO:0005507	copper ion binding	molecular_function	8
TRINITY_DN19044_c0_g1	TAIR|locus:505006351	57.1	3.9e-07	820771	MT3	GO:0005576	extracellular region	cellular_component	3
TRINITY_DN19044_c0_g1	TAIR|locus:505006351	57.1	3.9e-07	820771	MT3	GO:0005623	cell	cellular_component	3
TRINITY_DN19044_c0_g1	TAIR|locus:505006351	57.1	3.9e-07	820771	MT3	GO:0006878	cellular copper ion homeostasis	biological_process	12
TRINITY_DN19044_c0_g1	TAIR|locus:505006351	57.1	3.9e-07	820771	MT3	GO:0008270	zinc ion binding	molecular_function	8
TRINITY_DN19049_c0_g1	MGI|MGI:1926341	100	3.2e-08	53315	Sult1d1	GO:0000103	sulfate assimilation	biological_process	6
TRINITY_DN19049_c0_g1	MGI|MGI:1926341	100	3.2e-08	53315	Sult1d1	GO:0004062	aryl sulfotransferase activity	molecular_function	7
TRINITY_DN19049_c0_g1	MGI|MGI:1926341	100	3.2e-08	53315	Sult1d1	GO:0005737	cytoplasm	cellular_component	5
TRINITY_DN19049_c0_g1	MGI|MGI:1926341	100	3.2e-08	53315	Sult1d1	GO:0006584	catecholamine metabolic process	biological_process	8
TRINITY_DN19049_c0_g1	MGI|MGI:1926341	100	3.2e-08	53315	Sult1d1	GO:0006629	lipid metabolic process	biological_process	5
TRINITY_DN19049_c0_g1	MGI|MGI:1926341	100	3.2e-08	53315	Sult1d1	GO:0008146	sulfotransferase activity	molecular_function	6
TRINITY_DN19049_c0_g1	MGI|MGI:1926341	100	3.2e-08	53315	Sult1d1	GO:0016740	transferase activity	molecular_function	4
TRINITY_DN19049_c0_g1	MGI|MGI:1926341	100	3.2e-08	53315	Sult1d1	GO:0051923	sulfation	biological_process	6
TRINITY_DN19412_c0_g1	UNIPROTKB|B7P8W0	46.5	6.7e-14	8026315	IscW_ISCW003226	GO:0008068	extracellularly glutamate-gated chloride channel activity	molecular_function	11
TRINITY_DN195_c0_g1	WB|WBGene00004440	100	8e-75	174379	rpl-26	GO:0002181	cytoplasmic translation	biological_process	9
TRINITY_DN195_c0_g1	WB|WBGene00004440	100	8e-75	174379	rpl-26	GO:0003723	RNA binding	molecular_function	6
TRINITY_DN195_c0_g1	WB|WBGene00004440	100	8e-75	174379	rpl-26	GO:0003735	structural constituent of ribosome	molecular_function	4
TRINITY_DN195_c0_g1	WB|WBGene00004440	100	8e-75	174379	rpl-26	GO:0005840	ribosome	cellular_component	6
TRINITY_DN195_c0_g1	WB|WBGene00004440	100	8e-75	174379	rpl-26	GO:0006412	translation	biological_process	8
TRINITY_DN195_c0_g1	WB|WBGene00004440	100	8e-75	174379	rpl-26	GO:0015934	large ribosomal subunit	cellular_component	7
TRINITY_DN195_c0_g1	WB|WBGene00004440	100	8e-75	174379	rpl-26	GO:0022625	cytosolic large ribosomal subunit	cellular_component	8
TRINITY_DN195_c0_g1	WB|WBGene00004440	100	8e-75	174379	rpl-26	GO:0042273	ribosomal large subunit biogenesis	biological_process	6
TRINITY_DN19786_c0_g1	UNIPROTKB|Q8X132	73.5	4.9e-38	3875589	hh2a	GO:0000790	nuclear chromatin	cellular_component	7
TRINITY_DN19786_c0_g1	UNIPROTKB|Q8X132	73.5	4.9e-38	3875589	hh2a	GO:0003677	DNA binding	molecular_function	6
TRINITY_DN19786_c0_g1	UNIPROTKB|Q8X132	73.5	4.9e-38	3875589	hh2a	GO:0006342	chromatin silencing	biological_process	5
TRINITY_DN19830_c0_g1	UNIPROTKB|D0N8U6	94.6	4.6e-34	9462701	PITG_07661	GO:0005215	transporter activity	molecular_function	3
TRINITY_DN19830_c0_g1	UNIPROTKB|D0N8U6	94.6	4.6e-34	9462701	PITG_07661	GO:0016021	integral component of membrane	cellular_component	5
TRINITY_DN19830_c0_g1	UNIPROTKB|D0N8U6	94.6	4.6e-34	9462701	PITG_07661	GO:0034220	ion transmembrane transport	biological_process	7
TRINITY_DN19883_c0_g1	UNIPROTKB|B4DKL7	73.5	4.3e-06	-	TMEM104	GO:0016021	integral component of membrane	cellular_component	5
TRINITY_DN2040_c0_g1	UNIPROTKB|A9U0C6	73.2	1.9e-14	5947513	PHYPADRAFT_172983	GO:0003735	structural constituent of ribosome	molecular_function	4
TRINITY_DN2040_c0_g1	UNIPROTKB|A9U0C6	73.2	1.9e-14	5947513	PHYPADRAFT_172983	GO:0022625	cytosolic large ribosomal subunit	cellular_component	8
TRINITY_DN20491_c0_g1	MGI|MGI:1919210	100	1.1e-13	71960	Myh14	GO:0000146	microfilament motor activity	molecular_function	10
TRINITY_DN20491_c0_g1	MGI|MGI:1919210	100	1.1e-13	71960	Myh14	GO:0000166	nucleotide binding	molecular_function	5
TRINITY_DN20491_c0_g1	MGI|MGI:1919210	100	1.1e-13	71960	Myh14	GO:0001725	stress fiber	cellular_component	7
TRINITY_DN20491_c0_g1	MGI|MGI:1919210	100	1.1e-13	71960	Myh14	GO:0003009	skeletal muscle contraction	biological_process	8
TRINITY_DN20491_c0_g1	MGI|MGI:1919210	100	1.1e-13	71960	Myh14	GO:0003774	motor activity	molecular_function	9
TRINITY_DN20491_c0_g1	MGI|MGI:1919210	100	1.1e-13	71960	Myh14	GO:0003779	actin binding	molecular_function	6
TRINITY_DN20491_c0_g1	MGI|MGI:1919210	100	1.1e-13	71960	Myh14	GO:0005516	calmodulin binding	molecular_function	5
TRINITY_DN20491_c0_g1	MGI|MGI:1919210	100	1.1e-13	71960	Myh14	GO:0005524	ATP binding	molecular_function	5
TRINITY_DN20491_c0_g1	MGI|MGI:1919210	100	1.1e-13	71960	Myh14	GO:0005737	cytoplasm	cellular_component	5
TRINITY_DN20491_c0_g1	MGI|MGI:1919210	100	1.1e-13	71960	Myh14	GO:0005903	brush border	cellular_component	5
TRINITY_DN20491_c0_g1	MGI|MGI:1919210	100	1.1e-13	71960	Myh14	GO:0007519	skeletal muscle tissue development	biological_process	8
TRINITY_DN20491_c0_g1	MGI|MGI:1919210	100	1.1e-13	71960	Myh14	GO:0007605	sensory perception of sound	biological_process	8
TRINITY_DN20491_c0_g1	MGI|MGI:1919210	100	1.1e-13	71960	Myh14	GO:0008360	regulation of cell shape	biological_process	8
TRINITY_DN20491_c0_g1	MGI|MGI:1919210	100	1.1e-13	71960	Myh14	GO:0016459	myosin complex	cellular_component	4
TRINITY_DN20491_c0_g1	MGI|MGI:1919210	100	1.1e-13	71960	Myh14	GO:0016460	myosin II complex	cellular_component	5
TRINITY_DN20491_c0_g1	MGI|MGI:1919210	100	1.1e-13	71960	Myh14	GO:0016887	ATPase activity	molecular_function	9
TRINITY_DN20491_c0_g1	MGI|MGI:1919210	100	1.1e-13	71960	Myh14	GO:0019228	neuronal action potential	biological_process	7
TRINITY_DN20491_c0_g1	MGI|MGI:1919210	100	1.1e-13	71960	Myh14	GO:0030048	actin filament-based movement	biological_process	5
TRINITY_DN20491_c0_g1	MGI|MGI:1919210	100	1.1e-13	71960	Myh14	GO:0030424	axon	cellular_component	6
TRINITY_DN20491_c0_g1	MGI|MGI:1919210	100	1.1e-13	71960	Myh14	GO:0030426	growth cone	cellular_component	5
TRINITY_DN20491_c0_g1	MGI|MGI:1919210	100	1.1e-13	71960	Myh14	GO:0030898	actin-dependent ATPase activity	molecular_function	11
TRINITY_DN20491_c0_g1	MGI|MGI:1919210	100	1.1e-13	71960	Myh14	GO:0031032	actomyosin structure organization	biological_process	8
TRINITY_DN20491_c0_g1	MGI|MGI:1919210	100	1.1e-13	71960	Myh14	GO:0042641	actomyosin	cellular_component	6
TRINITY_DN20491_c0_g1	MGI|MGI:1919210	100	1.1e-13	71960	Myh14	GO:0043209	myelin sheath	cellular_component	4
TRINITY_DN20491_c0_g1	MGI|MGI:1919210	100	1.1e-13	71960	Myh14	GO:0051015	actin filament binding	molecular_function	7
TRINITY_DN20491_c0_g1	MGI|MGI:1919210	100	1.1e-13	71960	Myh14	GO:0070584	mitochondrion morphogenesis	biological_process	7
TRINITY_DN20491_c0_g1	MGI|MGI:1919210	100	1.1e-13	71960	Myh14	GO:0071625	vocalization behavior	biological_process	4
TRINITY_DN20491_c0_g1	MGI|MGI:1919210	100	1.1e-13	71960	Myh14	GO:0097513	myosin II filament	cellular_component	6
TRINITY_DN20592_c0_g2	UNIPROTKB|B7PKB8	36.1	3.8e-08	8052686	IscW_ISCW006806	GO:0008395	steroid hydroxylase activity	molecular_function	6
TRINITY_DN20702_c0_g1	UNIPROTKB|F1NX66	100	9.4e-24	424883	PLSCR1	GO:0005886	plasma membrane	cellular_component	4
TRINITY_DN20702_c0_g1	UNIPROTKB|F1NX66	100	9.4e-24	424883	PLSCR1	GO:0017121	phospholipid scrambling	biological_process	7
TRINITY_DN20702_c0_g1	UNIPROTKB|F1NX66	100	9.4e-24	424883	PLSCR1	GO:0017128	phospholipid scramblase activity	molecular_function	6
TRINITY_DN20854_c0_g2	UNIPROTKB|A8XDU2	100	5.4e-68	8582987	rps-22	GO:0003735	structural constituent of ribosome	molecular_function	4
TRINITY_DN20878_c0_g1	UNIPROTKB|P12785	51.2	6.4e-16	50671	FAS_RAT	GO:0005829	cytosol	cellular_component	6
TRINITY_DN2091_c0_g1	MGI|MGI:98785	91.1	1.7e-14	21959	Tnp2	GO:0000786	nucleosome	cellular_component	5
TRINITY_DN2091_c0_g1	MGI|MGI:98785	91.1	1.7e-14	21959	Tnp2	GO:0000788	nuclear nucleosome	cellular_component	6
TRINITY_DN2091_c0_g1	MGI|MGI:98785	91.1	1.7e-14	21959	Tnp2	GO:0001673	male germ cell nucleus	cellular_component	8
TRINITY_DN2091_c0_g1	MGI|MGI:98785	91.1	1.7e-14	21959	Tnp2	GO:0003677	DNA binding	molecular_function	6
TRINITY_DN2091_c0_g1	MGI|MGI:98785	91.1	1.7e-14	21959	Tnp2	GO:0005634	nucleus	cellular_component	6
TRINITY_DN2091_c0_g1	MGI|MGI:98785	91.1	1.7e-14	21959	Tnp2	GO:0005694	chromosome	cellular_component	6
TRINITY_DN2091_c0_g1	MGI|MGI:98785	91.1	1.7e-14	21959	Tnp2	GO:0007275	multicellular organism development	biological_process	4
TRINITY_DN2091_c0_g1	MGI|MGI:98785	91.1	1.7e-14	21959	Tnp2	GO:0007283	spermatogenesis	biological_process	7
TRINITY_DN2091_c0_g1	MGI|MGI:98785	91.1	1.7e-14	21959	Tnp2	GO:0007339	binding of sperm to zona pellucida	biological_process	7
TRINITY_DN2091_c0_g1	MGI|MGI:98785	91.1	1.7e-14	21959	Tnp2	GO:0007340	acrosome reaction	biological_process	4
TRINITY_DN2091_c0_g1	MGI|MGI:98785	91.1	1.7e-14	21959	Tnp2	GO:0007341	penetration of zona pellucida	biological_process	5
TRINITY_DN2091_c0_g1	MGI|MGI:98785	91.1	1.7e-14	21959	Tnp2	GO:0008270	zinc ion binding	molecular_function	8
TRINITY_DN2091_c0_g1	MGI|MGI:98785	91.1	1.7e-14	21959	Tnp2	GO:0010954	positive regulation of protein processing	biological_process	10
TRINITY_DN2091_c0_g1	MGI|MGI:98785	91.1	1.7e-14	21959	Tnp2	GO:0030154	cell differentiation	biological_process	5
TRINITY_DN2091_c0_g1	MGI|MGI:98785	91.1	1.7e-14	21959	Tnp2	GO:0030317	flagellated sperm motility	biological_process	5
TRINITY_DN2091_c0_g1	MGI|MGI:98785	91.1	1.7e-14	21959	Tnp2	GO:0035093	spermatogenesis, exchange of chromosomal proteins	biological_process	5
TRINITY_DN2091_c0_g1	MGI|MGI:98785	91.1	1.7e-14	21959	Tnp2	GO:0046872	metal ion binding	molecular_function	6
TRINITY_DN2091_c0_g2	MGI|MGI:98785	100	1.3e-07	21959	Tnp2	GO:0000786	nucleosome	cellular_component	5
TRINITY_DN2091_c0_g2	MGI|MGI:98785	100	1.3e-07	21959	Tnp2	GO:0000788	nuclear nucleosome	cellular_component	6
TRINITY_DN2091_c0_g2	MGI|MGI:98785	100	1.3e-07	21959	Tnp2	GO:0001673	male germ cell nucleus	cellular_component	8
TRINITY_DN2091_c0_g2	MGI|MGI:98785	100	1.3e-07	21959	Tnp2	GO:0003677	DNA binding	molecular_function	6
TRINITY_DN2091_c0_g2	MGI|MGI:98785	100	1.3e-07	21959	Tnp2	GO:0005634	nucleus	cellular_component	6
TRINITY_DN2091_c0_g2	MGI|MGI:98785	100	1.3e-07	21959	Tnp2	GO:0005694	chromosome	cellular_component	6
TRINITY_DN2091_c0_g2	MGI|MGI:98785	100	1.3e-07	21959	Tnp2	GO:0007275	multicellular organism development	biological_process	4
TRINITY_DN2091_c0_g2	MGI|MGI:98785	100	1.3e-07	21959	Tnp2	GO:0007283	spermatogenesis	biological_process	7
TRINITY_DN2091_c0_g2	MGI|MGI:98785	100	1.3e-07	21959	Tnp2	GO:0007339	binding of sperm to zona pellucida	biological_process	7
TRINITY_DN2091_c0_g2	MGI|MGI:98785	100	1.3e-07	21959	Tnp2	GO:0007340	acrosome reaction	biological_process	4
TRINITY_DN2091_c0_g2	MGI|MGI:98785	100	1.3e-07	21959	Tnp2	GO:0007341	penetration of zona pellucida	biological_process	5
TRINITY_DN2091_c0_g2	MGI|MGI:98785	100	1.3e-07	21959	Tnp2	GO:0008270	zinc ion binding	molecular_function	8
TRINITY_DN2091_c0_g2	MGI|MGI:98785	100	1.3e-07	21959	Tnp2	GO:0010954	positive regulation of protein processing	biological_process	10
TRINITY_DN2091_c0_g2	MGI|MGI:98785	100	1.3e-07	21959	Tnp2	GO:0030154	cell differentiation	biological_process	5
TRINITY_DN2091_c0_g2	MGI|MGI:98785	100	1.3e-07	21959	Tnp2	GO:0030317	flagellated sperm motility	biological_process	5
TRINITY_DN2091_c0_g2	MGI|MGI:98785	100	1.3e-07	21959	Tnp2	GO:0035093	spermatogenesis, exchange of chromosomal proteins	biological_process	5
TRINITY_DN2091_c0_g2	MGI|MGI:98785	100	1.3e-07	21959	Tnp2	GO:0046872	metal ion binding	molecular_function	6
TRINITY_DN2107_c0_g1	UNIPROTKB|B7QEK0	98.9	5.7e-45	8040085	IscW_ISCW012036	GO:0000398	mRNA splicing, via spliceosome	biological_process	13
TRINITY_DN2107_c0_g1	UNIPROTKB|B7QEK0	98.9	5.7e-45	8040085	IscW_ISCW012036	GO:0003723	RNA binding	molecular_function	6
TRINITY_DN2107_c0_g1	UNIPROTKB|B7QEK0	98.9	5.7e-45	8040085	IscW_ISCW012036	GO:0005685	U1 snRNP	cellular_component	8
TRINITY_DN2107_c0_g1	UNIPROTKB|B7QEK0	98.9	5.7e-45	8040085	IscW_ISCW012036	GO:0071013	catalytic step 2 spliceosome	cellular_component	7
TRINITY_DN2161_c0_g1	FB|FBgn0002593	85.1	8.6e-17	33214	RpLP1	GO:0002181	cytoplasmic translation	biological_process	9
TRINITY_DN2161_c0_g1	FB|FBgn0002593	85.1	8.6e-17	33214	RpLP1	GO:0003735	structural constituent of ribosome	molecular_function	4
TRINITY_DN2161_c0_g1	FB|FBgn0002593	85.1	8.6e-17	33214	RpLP1	GO:0005840	ribosome	cellular_component	6
TRINITY_DN2161_c0_g1	FB|FBgn0002593	85.1	8.6e-17	33214	RpLP1	GO:0006414	translational elongation	biological_process	8
TRINITY_DN2161_c0_g1	FB|FBgn0002593	85.1	8.6e-17	33214	RpLP1	GO:0022625	cytosolic large ribosomal subunit	cellular_component	8
TRINITY_DN2161_c0_g1	FB|FBgn0002593	85.1	8.6e-17	33214	RpLP1	GO:0022626	cytosolic ribosome	cellular_component	7
TRINITY_DN2161_c0_g1	FB|FBgn0002593	85.1	8.6e-17	33214	RpLP1	GO:0030295	protein kinase activator activity	molecular_function	7
TRINITY_DN2161_c0_g1	FB|FBgn0002593	85.1	8.6e-17	33214	RpLP1	GO:0045860	positive regulation of protein kinase activity	biological_process	11
TRINITY_DN21625_c0_g1	UNIPROTKB|F1NBV0	100	1.9e-34	-	PRDX6	GO:0004623	phospholipase A2 activity	molecular_function	8
TRINITY_DN21625_c0_g1	UNIPROTKB|F1NBV0	100	1.9e-34	-	PRDX6	GO:0005615	extracellular space	cellular_component	4
TRINITY_DN21625_c0_g1	UNIPROTKB|F1NBV0	100	1.9e-34	-	PRDX6	GO:0005737	cytoplasm	cellular_component	5
TRINITY_DN21625_c0_g1	UNIPROTKB|F1NBV0	100	1.9e-34	-	PRDX6	GO:0006979	response to oxidative stress	biological_process	5
TRINITY_DN21625_c0_g1	UNIPROTKB|F1NBV0	100	1.9e-34	-	PRDX6	GO:0009395	phospholipid catabolic process	biological_process	8
TRINITY_DN21625_c0_g1	UNIPROTKB|F1NBV0	100	1.9e-34	-	PRDX6	GO:0016020	membrane	cellular_component	3
TRINITY_DN21625_c0_g1	UNIPROTKB|F1NBV0	100	1.9e-34	-	PRDX6	GO:0031625	ubiquitin protein ligase binding	molecular_function	7
TRINITY_DN21625_c0_g1	UNIPROTKB|F1NBV0	100	1.9e-34	-	PRDX6	GO:0051920	peroxiredoxin activity	molecular_function	4
TRINITY_DN21625_c0_g1	UNIPROTKB|F1NBV0	100	1.9e-34	-	PRDX6	GO:0055114	oxidation-reduction process	biological_process	4
TRINITY_DN21625_c0_g1	UNIPROTKB|F1NBV0	100	1.9e-34	-	PRDX6	GO:0070062	extracellular exosome	cellular_component	7
TRINITY_DN21625_c0_g1	UNIPROTKB|F1NBV0	100	1.9e-34	-	PRDX6	GO:0098869	cellular oxidant detoxification	biological_process	5
TRINITY_DN2164_c0_g1	MGI|MGI:96213	100	2.8e-12	15445	Hpd	GO:0000139	Golgi membrane	cellular_component	7
TRINITY_DN2164_c0_g1	MGI|MGI:96213	100	2.8e-12	15445	Hpd	GO:0003868	4-hydroxyphenylpyruvate dioxygenase activity	molecular_function	7
TRINITY_DN2164_c0_g1	MGI|MGI:96213	100	2.8e-12	15445	Hpd	GO:0005737	cytoplasm	cellular_component	5
TRINITY_DN2164_c0_g1	MGI|MGI:96213	100	2.8e-12	15445	Hpd	GO:0005783	endoplasmic reticulum	cellular_component	6
TRINITY_DN2164_c0_g1	MGI|MGI:96213	100	2.8e-12	15445	Hpd	GO:0005789	endoplasmic reticulum membrane	cellular_component	5
TRINITY_DN2164_c0_g1	MGI|MGI:96213	100	2.8e-12	15445	Hpd	GO:0005794	Golgi apparatus	cellular_component	6
TRINITY_DN2164_c0_g1	MGI|MGI:96213	100	2.8e-12	15445	Hpd	GO:0006559	L-phenylalanine catabolic process	biological_process	11
TRINITY_DN2164_c0_g1	MGI|MGI:96213	100	2.8e-12	15445	Hpd	GO:0006572	tyrosine catabolic process	biological_process	11
TRINITY_DN2164_c0_g1	MGI|MGI:96213	100	2.8e-12	15445	Hpd	GO:0008127	quercetin 2,3-dioxygenase activity	molecular_function	7
TRINITY_DN2164_c0_g1	MGI|MGI:96213	100	2.8e-12	15445	Hpd	GO:0009072	aromatic amino acid family metabolic process	biological_process	9
TRINITY_DN2164_c0_g1	MGI|MGI:96213	100	2.8e-12	15445	Hpd	GO:0016020	membrane	cellular_component	3
TRINITY_DN2164_c0_g1	MGI|MGI:96213	100	2.8e-12	15445	Hpd	GO:0016491	oxidoreductase activity	molecular_function	4
TRINITY_DN2164_c0_g1	MGI|MGI:96213	100	2.8e-12	15445	Hpd	GO:0016701	oxidoreductase activity, acting on single donors with incorporation of molecular oxygen	molecular_function	5
TRINITY_DN2164_c0_g1	MGI|MGI:96213	100	2.8e-12	15445	Hpd	GO:0046872	metal ion binding	molecular_function	6
TRINITY_DN2164_c0_g1	MGI|MGI:96213	100	2.8e-12	15445	Hpd	GO:0051213	dioxygenase activity	molecular_function	5
TRINITY_DN2164_c0_g1	MGI|MGI:96213	100	2.8e-12	15445	Hpd	GO:0055114	oxidation-reduction process	biological_process	4
TRINITY_DN216_c0_g1	FB|FBgn0030749	45.6	7.5e-14	32612	AnxB11	GO:0003779	actin binding	molecular_function	6
TRINITY_DN216_c0_g1	FB|FBgn0030749	45.6	7.5e-14	32612	AnxB11	GO:0005509	calcium ion binding	molecular_function	7
TRINITY_DN216_c0_g1	FB|FBgn0030749	45.6	7.5e-14	32612	AnxB11	GO:0005544	calcium-dependent phospholipid binding	molecular_function	6
TRINITY_DN216_c0_g1	FB|FBgn0030749	45.6	7.5e-14	32612	AnxB11	GO:0005575	cellular_component	cellular_component	2
TRINITY_DN21882_c1_g1	UNIPROTKB|D0MVN7	95.8	2.2e-33	9469571	PITG_02174	GO:0005887	integral component of plasma membrane	cellular_component	6
TRINITY_DN21882_c1_g1	UNIPROTKB|D0MVN7	95.8	2.2e-33	9469571	PITG_02174	GO:0008519	ammonium transmembrane transporter activity	molecular_function	7
TRINITY_DN21882_c1_g1	UNIPROTKB|D0MVN7	95.8	2.2e-33	9469571	PITG_02174	GO:0015695	organic cation transport	biological_process	8
TRINITY_DN21882_c1_g1	UNIPROTKB|D0MVN7	95.8	2.2e-33	9469571	PITG_02174	GO:0019740	nitrogen utilization	biological_process	3
TRINITY_DN21882_c1_g1	UNIPROTKB|D0MVN7	95.8	2.2e-33	9469571	PITG_02174	GO:0072488	ammonium transmembrane transport	biological_process	9
TRINITY_DN21954_c0_g1	WB|WBGene00005324	72.7	9.2e-17	191880	T27A1.1	GO:0016020	membrane	cellular_component	3
TRINITY_DN21954_c0_g1	WB|WBGene00005324	72.7	9.2e-17	191880	T27A1.1	GO:0016021	integral component of membrane	cellular_component	5
TRINITY_DN21_c0_g1	WB|WBGene00004444	100	3.4e-54	172921	rpl-30	GO:0002181	cytoplasmic translation	biological_process	9
TRINITY_DN21_c0_g1	WB|WBGene00004444	100	3.4e-54	172921	rpl-30	GO:0003723	RNA binding	molecular_function	6
TRINITY_DN21_c0_g1	WB|WBGene00004444	100	3.4e-54	172921	rpl-30	GO:0003735	structural constituent of ribosome	molecular_function	4
TRINITY_DN21_c0_g1	WB|WBGene00004444	100	3.4e-54	172921	rpl-30	GO:0005622	intracellular	cellular_component	4
TRINITY_DN21_c0_g1	WB|WBGene00004444	100	3.4e-54	172921	rpl-30	GO:0005840	ribosome	cellular_component	6
TRINITY_DN21_c0_g1	WB|WBGene00004444	100	3.4e-54	172921	rpl-30	GO:0006412	translation	biological_process	8
TRINITY_DN21_c0_g1	WB|WBGene00004444	100	3.4e-54	172921	rpl-30	GO:0008340	determination of adult lifespan	biological_process	4
TRINITY_DN21_c0_g1	WB|WBGene00004444	100	3.4e-54	172921	rpl-30	GO:0022625	cytosolic large ribosomal subunit	cellular_component	8
TRINITY_DN22390_c0_g1	UNIPROTKB|Q8UWG7	100	1.8e-39	373957	RPL6	GO:0000027	ribosomal large subunit assembly	biological_process	9
TRINITY_DN22390_c0_g1	UNIPROTKB|Q8UWG7	100	1.8e-39	373957	RPL6	GO:0002181	cytoplasmic translation	biological_process	9
TRINITY_DN22390_c0_g1	UNIPROTKB|Q8UWG7	100	1.8e-39	373957	RPL6	GO:0003735	structural constituent of ribosome	molecular_function	4
TRINITY_DN22390_c0_g1	UNIPROTKB|Q8UWG7	100	1.8e-39	373957	RPL6	GO:0005634	nucleus	cellular_component	6
TRINITY_DN22390_c0_g1	UNIPROTKB|Q8UWG7	100	1.8e-39	373957	RPL6	GO:0005925	focal adhesion	cellular_component	7
TRINITY_DN22390_c0_g1	UNIPROTKB|Q8UWG7	100	1.8e-39	373957	RPL6	GO:0016020	membrane	cellular_component	3
TRINITY_DN22390_c0_g1	UNIPROTKB|Q8UWG7	100	1.8e-39	373957	RPL6	GO:0022625	cytosolic large ribosomal subunit	cellular_component	8
TRINITY_DN22390_c0_g1	UNIPROTKB|Q8UWG7	100	1.8e-39	373957	RPL6	GO:0036464	cytoplasmic ribonucleoprotein granule	cellular_component	7
TRINITY_DN22729_c0_g1	ZFIN|ZDB-GENE-130530-826	67.6	1.5e-24	-	slx1b	GO:0004518	nuclease activity	molecular_function	6
TRINITY_DN22729_c0_g1	ZFIN|ZDB-GENE-130530-826	67.6	1.5e-24	-	slx1b	GO:0004519	endonuclease activity	molecular_function	7
TRINITY_DN22729_c0_g1	ZFIN|ZDB-GENE-130530-826	67.6	1.5e-24	-	slx1b	GO:0005634	nucleus	cellular_component	6
TRINITY_DN22729_c0_g1	ZFIN|ZDB-GENE-130530-826	67.6	1.5e-24	-	slx1b	GO:0006281	DNA repair	biological_process	8
TRINITY_DN22729_c0_g1	ZFIN|ZDB-GENE-130530-826	67.6	1.5e-24	-	slx1b	GO:0006310	DNA recombination	biological_process	8
TRINITY_DN22729_c0_g1	ZFIN|ZDB-GENE-130530-826	67.6	1.5e-24	-	slx1b	GO:0006974	cellular response to DNA damage stimulus	biological_process	6
TRINITY_DN22729_c0_g1	ZFIN|ZDB-GENE-130530-826	67.6	1.5e-24	-	slx1b	GO:0016787	hydrolase activity	molecular_function	4
TRINITY_DN22729_c0_g1	ZFIN|ZDB-GENE-130530-826	67.6	1.5e-24	-	slx1b	GO:0017108	5'-flap endonuclease activity	molecular_function	10
TRINITY_DN22729_c0_g1	ZFIN|ZDB-GENE-130530-826	67.6	1.5e-24	-	slx1b	GO:0033557	Slx1-Slx4 complex	cellular_component	4
TRINITY_DN22754_c0_g1	ZFIN|ZDB-GENE-110411-276	40.2	2.5e-13	565649	fyco1a	GO:0005524	ATP binding	molecular_function	5
TRINITY_DN22754_c0_g1	ZFIN|ZDB-GENE-110411-276	40.2	2.5e-13	565649	fyco1a	GO:0005764	lysosome	cellular_component	8
TRINITY_DN22754_c0_g1	ZFIN|ZDB-GENE-110411-276	40.2	2.5e-13	565649	fyco1a	GO:0005770	late endosome	cellular_component	8
TRINITY_DN22754_c0_g1	ZFIN|ZDB-GENE-110411-276	40.2	2.5e-13	565649	fyco1a	GO:0005776	autophagosome	cellular_component	7
TRINITY_DN22754_c0_g1	ZFIN|ZDB-GENE-110411-276	40.2	2.5e-13	565649	fyco1a	GO:0005832	chaperonin-containing T-complex	cellular_component	7
TRINITY_DN22754_c0_g1	ZFIN|ZDB-GENE-110411-276	40.2	2.5e-13	565649	fyco1a	GO:0006458	'de novo' protein folding	biological_process	5
TRINITY_DN22754_c0_g1	ZFIN|ZDB-GENE-110411-276	40.2	2.5e-13	565649	fyco1a	GO:0044183	protein binding involved in protein folding	molecular_function	3
TRINITY_DN22754_c0_g1	ZFIN|ZDB-GENE-110411-276	40.2	2.5e-13	565649	fyco1a	GO:0046872	metal ion binding	molecular_function	6
TRINITY_DN22754_c0_g1	ZFIN|ZDB-GENE-110411-276	40.2	2.5e-13	565649	fyco1a	GO:0051082	unfolded protein binding	molecular_function	5
TRINITY_DN22754_c0_g1	ZFIN|ZDB-GENE-110411-276	40.2	2.5e-13	565649	fyco1a	GO:0061077	chaperone-mediated protein folding	biological_process	5
TRINITY_DN22754_c0_g1	ZFIN|ZDB-GENE-110411-276	40.2	2.5e-13	565649	fyco1a	GO:0072383	plus-end-directed vesicle transport along microtubule	biological_process	11
TRINITY_DN22754_c0_g1	ZFIN|ZDB-GENE-110411-276	40.2	2.5e-13	565649	fyco1a	GO:1901098	positive regulation of autophagosome maturation	biological_process	9
TRINITY_DN23008_c0_g1	UNIPROTKB|E1C3G8	100	6.6e-29	776054	RPS29	GO:0003735	structural constituent of ribosome	molecular_function	4
TRINITY_DN23008_c0_g1	UNIPROTKB|E1C3G8	100	6.6e-29	776054	RPS29	GO:0005925	focal adhesion	cellular_component	7
TRINITY_DN23008_c0_g1	UNIPROTKB|E1C3G8	100	6.6e-29	776054	RPS29	GO:0006412	translation	biological_process	8
TRINITY_DN23008_c0_g1	UNIPROTKB|E1C3G8	100	6.6e-29	776054	RPS29	GO:0008270	zinc ion binding	molecular_function	8
TRINITY_DN23008_c0_g1	UNIPROTKB|E1C3G8	100	6.6e-29	776054	RPS29	GO:0022627	cytosolic small ribosomal subunit	cellular_component	8
TRINITY_DN23008_c0_g1	UNIPROTKB|E1C3G8	100	6.6e-29	776054	RPS29	GO:0070062	extracellular exosome	cellular_component	7
TRINITY_DN2300_c0_g1	FB|FBgn0250847	30.2	6.5e-24	33751	CG14034	GO:0004620	phospholipase activity	molecular_function	7
TRINITY_DN2300_c0_g1	FB|FBgn0250847	30.2	6.5e-24	33751	CG14034	GO:0005615	extracellular space	cellular_component	4
TRINITY_DN2300_c0_g1	FB|FBgn0250847	30.2	6.5e-24	33751	CG14034	GO:0006629	lipid metabolic process	biological_process	5
TRINITY_DN2300_c0_g1	FB|FBgn0250847	30.2	6.5e-24	33751	CG14034	GO:0006644	phospholipid metabolic process	biological_process	7
TRINITY_DN2300_c0_g1	FB|FBgn0250847	30.2	6.5e-24	33751	CG14034	GO:0032504	multicellular organism reproduction	biological_process	4
TRINITY_DN2300_c0_g1	FB|FBgn0250847	30.2	6.5e-24	33751	CG14034	GO:0052689	carboxylic ester hydrolase activity	molecular_function	6
TRINITY_DN23015_c0_g1	UNIPROTKB|F1NYZ2	100	4.1e-67	-	MAP2K2	GO:0000187	activation of MAPK activity	biological_process	13
TRINITY_DN23015_c0_g1	UNIPROTKB|F1NYZ2	100	4.1e-67	-	MAP2K2	GO:0004674	protein serine/threonine kinase activity	molecular_function	8
TRINITY_DN23015_c0_g1	UNIPROTKB|F1NYZ2	100	4.1e-67	-	MAP2K2	GO:0004708	MAP kinase kinase activity	molecular_function	9
TRINITY_DN23015_c0_g1	UNIPROTKB|F1NYZ2	100	4.1e-67	-	MAP2K2	GO:0005524	ATP binding	molecular_function	5
TRINITY_DN23015_c0_g1	UNIPROTKB|F1NYZ2	100	4.1e-67	-	MAP2K2	GO:0005778	peroxisomal membrane	cellular_component	8
TRINITY_DN23015_c0_g1	UNIPROTKB|F1NYZ2	100	4.1e-67	-	MAP2K2	GO:0005783	endoplasmic reticulum	cellular_component	6
TRINITY_DN23015_c0_g1	UNIPROTKB|F1NYZ2	100	4.1e-67	-	MAP2K2	GO:0005794	Golgi apparatus	cellular_component	6
TRINITY_DN23015_c0_g1	UNIPROTKB|F1NYZ2	100	4.1e-67	-	MAP2K2	GO:0005874	microtubule	cellular_component	7
TRINITY_DN23015_c0_g1	UNIPROTKB|F1NYZ2	100	4.1e-67	-	MAP2K2	GO:0005911	cell-cell junction	cellular_component	4
TRINITY_DN23015_c0_g1	UNIPROTKB|F1NYZ2	100	4.1e-67	-	MAP2K2	GO:0007507	heart development	biological_process	6
TRINITY_DN23015_c0_g1	UNIPROTKB|F1NYZ2	100	4.1e-67	-	MAP2K2	GO:0009898	cytoplasmic side of plasma membrane	cellular_component	5
TRINITY_DN23015_c0_g1	UNIPROTKB|F1NYZ2	100	4.1e-67	-	MAP2K2	GO:0010629	negative regulation of gene expression	biological_process	8
TRINITY_DN23015_c0_g1	UNIPROTKB|F1NYZ2	100	4.1e-67	-	MAP2K2	GO:0030165	PDZ domain binding	molecular_function	6
TRINITY_DN23015_c0_g1	UNIPROTKB|F1NYZ2	100	4.1e-67	-	MAP2K2	GO:0030878	thyroid gland development	biological_process	7
TRINITY_DN23015_c0_g1	UNIPROTKB|F1NYZ2	100	4.1e-67	-	MAP2K2	GO:0036289	peptidyl-serine autophosphorylation	biological_process	11
TRINITY_DN23015_c0_g1	UNIPROTKB|F1NYZ2	100	4.1e-67	-	MAP2K2	GO:0043539	protein serine/threonine kinase activator activity	molecular_function	8
TRINITY_DN23015_c0_g1	UNIPROTKB|F1NYZ2	100	4.1e-67	-	MAP2K2	GO:0048471	perinuclear region of cytoplasm	cellular_component	6
TRINITY_DN23015_c0_g1	UNIPROTKB|F1NYZ2	100	4.1e-67	-	MAP2K2	GO:0048538	thymus development	biological_process	7
TRINITY_DN23015_c0_g1	UNIPROTKB|F1NYZ2	100	4.1e-67	-	MAP2K2	GO:0048679	regulation of axon regeneration	biological_process	7
TRINITY_DN23015_c0_g1	UNIPROTKB|F1NYZ2	100	4.1e-67	-	MAP2K2	GO:0050772	positive regulation of axonogenesis	biological_process	10
TRINITY_DN23015_c0_g1	UNIPROTKB|F1NYZ2	100	4.1e-67	-	MAP2K2	GO:0060324	face development	biological_process	5
TRINITY_DN23015_c0_g1	UNIPROTKB|F1NYZ2	100	4.1e-67	-	MAP2K2	GO:0060440	trachea formation	biological_process	6
TRINITY_DN23015_c0_g1	UNIPROTKB|F1NYZ2	100	4.1e-67	-	MAP2K2	GO:0060502	epithelial cell proliferation involved in lung morphogenesis	biological_process	5
TRINITY_DN23015_c0_g1	UNIPROTKB|F1NYZ2	100	4.1e-67	-	MAP2K2	GO:0070371	ERK1 and ERK2 cascade	biological_process	12
TRINITY_DN23015_c0_g1	UNIPROTKB|F1NYZ2	100	4.1e-67	-	MAP2K2	GO:0097110	scaffold protein binding	molecular_function	5
TRINITY_DN23015_c0_g1	UNIPROTKB|F1NYZ2	100	4.1e-67	-	MAP2K2	GO:2000147	positive regulation of cell motility	biological_process	7
TRINITY_DN23157_c0_g1	WB|WBGene00006803	56.6	1.2e-17	179077	unc-70	GO:0002119	nematode larval development	biological_process	6
TRINITY_DN23157_c0_g1	WB|WBGene00006803	56.6	1.2e-17	179077	unc-70	GO:0003779	actin binding	molecular_function	6
TRINITY_DN23157_c0_g1	WB|WBGene00006803	56.6	1.2e-17	179077	unc-70	GO:0005200	structural constituent of cytoskeleton	molecular_function	4
TRINITY_DN23157_c0_g1	WB|WBGene00006803	56.6	1.2e-17	179077	unc-70	GO:0005543	phospholipid binding	molecular_function	5
TRINITY_DN23157_c0_g1	WB|WBGene00006803	56.6	1.2e-17	179077	unc-70	GO:0005737	cytoplasm	cellular_component	5
TRINITY_DN23157_c0_g1	WB|WBGene00006803	56.6	1.2e-17	179077	unc-70	GO:0005856	cytoskeleton	cellular_component	6
TRINITY_DN23157_c0_g1	WB|WBGene00006803	56.6	1.2e-17	179077	unc-70	GO:0007010	cytoskeleton organization	biological_process	6
TRINITY_DN23157_c0_g1	WB|WBGene00006803	56.6	1.2e-17	179077	unc-70	GO:0008091	spectrin	cellular_component	6
TRINITY_DN23157_c0_g1	WB|WBGene00006803	56.6	1.2e-17	179077	unc-70	GO:0008305	integrin complex	cellular_component	5
TRINITY_DN23157_c0_g1	WB|WBGene00006803	56.6	1.2e-17	179077	unc-70	GO:0010172	embryonic body morphogenesis	biological_process	6
TRINITY_DN23157_c0_g1	WB|WBGene00006803	56.6	1.2e-17	179077	unc-70	GO:0016328	lateral plasma membrane	cellular_component	5
TRINITY_DN23157_c0_g1	WB|WBGene00006803	56.6	1.2e-17	179077	unc-70	GO:0016358	dendrite development	biological_process	8
TRINITY_DN23157_c0_g1	WB|WBGene00006803	56.6	1.2e-17	179077	unc-70	GO:0030054	cell junction	cellular_component	3
TRINITY_DN23157_c0_g1	WB|WBGene00006803	56.6	1.2e-17	179077	unc-70	GO:0031430	M band	cellular_component	5
TRINITY_DN23157_c0_g1	WB|WBGene00006803	56.6	1.2e-17	179077	unc-70	GO:0031674	I band	cellular_component	5
TRINITY_DN23157_c0_g1	WB|WBGene00006803	56.6	1.2e-17	179077	unc-70	GO:0040012	regulation of locomotion	biological_process	5
TRINITY_DN23157_c0_g1	WB|WBGene00006803	56.6	1.2e-17	179077	unc-70	GO:0046716	muscle cell cellular homeostasis	biological_process	5
TRINITY_DN23157_c0_g1	WB|WBGene00006803	56.6	1.2e-17	179077	unc-70	GO:0048666	neuron development	biological_process	6
TRINITY_DN23157_c0_g1	WB|WBGene00006803	56.6	1.2e-17	179077	unc-70	GO:0051693	actin filament capping	biological_process	10
TRINITY_DN23219_c0_g1	UNIPROTKB|D0MRX0	98.5	4.1e-27	9472737	PITG_00879	GO:0003723	RNA binding	molecular_function	6
TRINITY_DN23219_c0_g1	UNIPROTKB|D0MRX0	98.5	4.1e-27	9472737	PITG_00879	GO:0003735	structural constituent of ribosome	molecular_function	4
TRINITY_DN23219_c0_g1	UNIPROTKB|D0MRX0	98.5	4.1e-27	9472737	PITG_00879	GO:0022625	cytosolic large ribosomal subunit	cellular_component	8
TRINITY_DN23219_c0_g2	UNIPROTKB|D0MRX0	98.2	1.8e-56	9472737	PITG_00879	GO:0003723	RNA binding	molecular_function	6
TRINITY_DN23219_c0_g2	UNIPROTKB|D0MRX0	98.2	1.8e-56	9472737	PITG_00879	GO:0003735	structural constituent of ribosome	molecular_function	4
TRINITY_DN23219_c0_g2	UNIPROTKB|D0MRX0	98.2	1.8e-56	9472737	PITG_00879	GO:0022625	cytosolic large ribosomal subunit	cellular_component	8
TRINITY_DN23281_c0_g1	FB|FBgn0020236	84.2	5.8e-32	36760	ATPCL	GO:0003878	ATP citrate synthase activity	molecular_function	7
TRINITY_DN23281_c0_g1	FB|FBgn0020236	84.2	5.8e-32	36760	ATPCL	GO:0005829	cytosol	cellular_component	6
TRINITY_DN23281_c0_g1	FB|FBgn0020236	84.2	5.8e-32	36760	ATPCL	GO:0006085	acetyl-CoA biosynthetic process	biological_process	9
TRINITY_DN23281_c0_g1	FB|FBgn0020236	84.2	5.8e-32	36760	ATPCL	GO:0006101	citrate metabolic process	biological_process	7
TRINITY_DN23281_c0_g1	FB|FBgn0020236	84.2	5.8e-32	36760	ATPCL	GO:0006633	fatty acid biosynthetic process	biological_process	10
TRINITY_DN23281_c0_g1	FB|FBgn0020236	84.2	5.8e-32	36760	ATPCL	GO:0009346	citrate lyase complex	cellular_component	4
TRINITY_DN23281_c0_g1	FB|FBgn0020236	84.2	5.8e-32	36760	ATPCL	GO:0010906	regulation of glucose metabolic process	biological_process	9
TRINITY_DN23281_c0_g1	FB|FBgn0020236	84.2	5.8e-32	36760	ATPCL	GO:0048037	cofactor binding	molecular_function	4
TRINITY_DN23285_c0_g1	UNIPROTKB|F1P398	42.5	7.5e-38	-	TLL1	GO:0004222	metalloendopeptidase activity	molecular_function	8
TRINITY_DN23285_c0_g1	UNIPROTKB|F1P398	42.5	7.5e-38	-	TLL1	GO:0005509	calcium ion binding	molecular_function	7
TRINITY_DN23285_c0_g1	UNIPROTKB|F1P398	42.5	7.5e-38	-	TLL1	GO:0006508	proteolysis	biological_process	7
TRINITY_DN23285_c0_g1	UNIPROTKB|F1P398	42.5	7.5e-38	-	TLL1	GO:0008270	zinc ion binding	molecular_function	8
TRINITY_DN23353_c0_g1	FB|FBgn0259984	58.1	5.5e-08	-	kuz	GO:0003007	heart morphogenesis	biological_process	6
TRINITY_DN23353_c0_g1	FB|FBgn0259984	58.1	5.5e-08	-	kuz	GO:0004222	metalloendopeptidase activity	molecular_function	8
TRINITY_DN23353_c0_g1	FB|FBgn0259984	58.1	5.5e-08	-	kuz	GO:0006509	membrane protein ectodomain proteolysis	biological_process	9
TRINITY_DN23353_c0_g1	FB|FBgn0259984	58.1	5.5e-08	-	kuz	GO:0006909	phagocytosis	biological_process	7
TRINITY_DN23353_c0_g1	FB|FBgn0259984	58.1	5.5e-08	-	kuz	GO:0007219	Notch signaling pathway	biological_process	6
TRINITY_DN23353_c0_g1	FB|FBgn0259984	58.1	5.5e-08	-	kuz	GO:0007220	Notch receptor processing	biological_process	8
TRINITY_DN23353_c0_g1	FB|FBgn0259984	58.1	5.5e-08	-	kuz	GO:0007298	border follicle cell migration	biological_process	10
TRINITY_DN23353_c0_g1	FB|FBgn0259984	58.1	5.5e-08	-	kuz	GO:0007400	neuroblast fate determination	biological_process	7
TRINITY_DN23353_c0_g1	FB|FBgn0259984	58.1	5.5e-08	-	kuz	GO:0007411	axon guidance	biological_process	6
TRINITY_DN23353_c0_g1	FB|FBgn0259984	58.1	5.5e-08	-	kuz	GO:0007417	central nervous system development	biological_process	6
TRINITY_DN23353_c0_g1	FB|FBgn0259984	58.1	5.5e-08	-	kuz	GO:0007419	ventral cord development	biological_process	6
TRINITY_DN23353_c0_g1	FB|FBgn0259984	58.1	5.5e-08	-	kuz	GO:0007519	skeletal muscle tissue development	biological_process	8
TRINITY_DN23353_c0_g1	FB|FBgn0259984	58.1	5.5e-08	-	kuz	GO:0008347	glial cell migration	biological_process	7
TRINITY_DN23353_c0_g1	FB|FBgn0259984	58.1	5.5e-08	-	kuz	GO:0016021	integral component of membrane	cellular_component	5
TRINITY_DN23353_c0_g1	FB|FBgn0259984	58.1	5.5e-08	-	kuz	GO:0030516	regulation of axon extension	biological_process	7
TRINITY_DN23353_c0_g1	FB|FBgn0259984	58.1	5.5e-08	-	kuz	GO:0035051	cardiocyte differentiation	biological_process	6
TRINITY_DN23353_c0_g1	FB|FBgn0259984	58.1	5.5e-08	-	kuz	GO:0035386	regulation of Roundabout signaling pathway	biological_process	8
TRINITY_DN23353_c0_g1	FB|FBgn0259984	58.1	5.5e-08	-	kuz	GO:0048477	oogenesis	biological_process	6
TRINITY_DN23353_c0_g1	FB|FBgn0259984	58.1	5.5e-08	-	kuz	GO:0048542	lymph gland development	biological_process	7
TRINITY_DN23353_c0_g1	FB|FBgn0259984	58.1	5.5e-08	-	kuz	GO:0060537	muscle tissue development	biological_process	6
TRINITY_DN23353_c0_g1	FB|FBgn0259984	58.1	5.5e-08	-	kuz	GO:0061320	pericardial nephrocyte differentiation	biological_process	8
TRINITY_DN23353_c0_g1	FB|FBgn0259984	58.1	5.5e-08	-	kuz	GO:0098595	perivitelline space	cellular_component	4
TRINITY_DN23420_c0_g2	FB|FBgn0262952	47	2.4e-55	19893551	mt:ND4	GO:0003954	NADH dehydrogenase activity	molecular_function	6
TRINITY_DN23420_c0_g2	FB|FBgn0262952	47	2.4e-55	19893551	mt:ND4	GO:0005747	mitochondrial respiratory chain complex I	cellular_component	7
TRINITY_DN23420_c0_g2	FB|FBgn0262952	47	2.4e-55	19893551	mt:ND4	GO:0006120	mitochondrial electron transport, NADH to ubiquinone	biological_process	8
TRINITY_DN23420_c0_g2	FB|FBgn0262952	47	2.4e-55	19893551	mt:ND4	GO:0008137	NADH dehydrogenase (ubiquinone) activity	molecular_function	8
TRINITY_DN23420_c0_g2	FB|FBgn0262952	47	2.4e-55	19893551	mt:ND4	GO:0009060	aerobic respiration	biological_process	8
TRINITY_DN23420_c0_g2	FB|FBgn0262952	47	2.4e-55	19893551	mt:ND4	GO:0015990	electron transport coupled proton transport	biological_process	11
TRINITY_DN23420_c0_g2	FB|FBgn0262952	47	2.4e-55	19893551	mt:ND4	GO:0045271	respiratory chain complex I	cellular_component	6
TRINITY_DN23420_c0_g2	FB|FBgn0262952	47	2.4e-55	19893551	mt:ND4	GO:0048039	ubiquinone binding	molecular_function	6
TRINITY_DN23525_c0_g1	FB|FBgn0040309	87.2	2.7e-18	53578	Jafrac1	GO:0005829	cytosol	cellular_component	6
TRINITY_DN23525_c0_g1	FB|FBgn0040309	87.2	2.7e-18	53578	Jafrac1	GO:0006974	cellular response to DNA damage stimulus	biological_process	6
TRINITY_DN23525_c0_g1	FB|FBgn0040309	87.2	2.7e-18	53578	Jafrac1	GO:0006979	response to oxidative stress	biological_process	5
TRINITY_DN23525_c0_g1	FB|FBgn0040309	87.2	2.7e-18	53578	Jafrac1	GO:0007155	cell adhesion	biological_process	4
TRINITY_DN23525_c0_g1	FB|FBgn0040309	87.2	2.7e-18	53578	Jafrac1	GO:0007281	germ cell development	biological_process	5
TRINITY_DN23525_c0_g1	FB|FBgn0040309	87.2	2.7e-18	53578	Jafrac1	GO:0008340	determination of adult lifespan	biological_process	4
TRINITY_DN23525_c0_g1	FB|FBgn0040309	87.2	2.7e-18	53578	Jafrac1	GO:0008354	germ cell migration	biological_process	7
TRINITY_DN23525_c0_g1	FB|FBgn0040309	87.2	2.7e-18	53578	Jafrac1	GO:0008379	thioredoxin peroxidase activity	molecular_function	5
TRINITY_DN23525_c0_g1	FB|FBgn0040309	87.2	2.7e-18	53578	Jafrac1	GO:0010906	regulation of glucose metabolic process	biological_process	9
TRINITY_DN23525_c0_g1	FB|FBgn0040309	87.2	2.7e-18	53578	Jafrac1	GO:0042594	response to starvation	biological_process	5
TRINITY_DN23525_c0_g1	FB|FBgn0040309	87.2	2.7e-18	53578	Jafrac1	GO:0042744	hydrogen peroxide catabolic process	biological_process	8
TRINITY_DN23525_c0_g1	FB|FBgn0040309	87.2	2.7e-18	53578	Jafrac1	GO:0045454	cell redox homeostasis	biological_process	5
TRINITY_DN23525_c0_g1	FB|FBgn0040309	87.2	2.7e-18	53578	Jafrac1	GO:0055114	oxidation-reduction process	biological_process	4
TRINITY_DN23634_c0_g1	TAIR|locus:2034081	48.6	3.1e-08	841632	MBP2	GO:0005576	extracellular region	cellular_component	3
TRINITY_DN23634_c0_g1	TAIR|locus:2034081	48.6	3.1e-08	841632	MBP2	GO:0006952	defense response	biological_process	5
TRINITY_DN23634_c0_g1	TAIR|locus:2034081	48.6	3.1e-08	841632	MBP2	GO:0007155	cell adhesion	biological_process	4
TRINITY_DN23634_c0_g1	TAIR|locus:2034081	48.6	3.1e-08	841632	MBP2	GO:0009611	response to wounding	biological_process	5
TRINITY_DN23634_c0_g1	TAIR|locus:2034081	48.6	3.1e-08	841632	MBP2	GO:0009908	flower development	biological_process	6
TRINITY_DN23634_c0_g1	TAIR|locus:2034081	48.6	3.1e-08	841632	MBP2	GO:0010169	thioglucosidase complex	cellular_component	6
TRINITY_DN23634_c0_g1	TAIR|locus:2034081	48.6	3.1e-08	841632	MBP2	GO:0010180	thioglucosidase binding	molecular_function	6
TRINITY_DN23634_c0_g1	TAIR|locus:2034081	48.6	3.1e-08	841632	MBP2	GO:0030246	carbohydrate binding	molecular_function	4
TRINITY_DN2369_c0_g1	FB|FBgn0023510	53.3	7.2e-35	31155	Rbcn-3B	GO:0005737	cytoplasm	cellular_component	5
TRINITY_DN2369_c0_g1	FB|FBgn0023510	53.3	7.2e-35	31155	Rbcn-3B	GO:0007035	vacuolar acidification	biological_process	13
TRINITY_DN2369_c0_g1	FB|FBgn0023510	53.3	7.2e-35	31155	Rbcn-3B	GO:0008593	regulation of Notch signaling pathway	biological_process	8
TRINITY_DN2369_c0_g1	FB|FBgn0023510	53.3	7.2e-35	31155	Rbcn-3B	GO:0035149	lumen formation, open tracheal system	biological_process	6
TRINITY_DN23734_c0_g2	UNIPROTKB|H8WH74	38.1	2.9e-17	-	CBG24470	GO:0004674	protein serine/threonine kinase activity	molecular_function	8
TRINITY_DN23734_c0_g2	UNIPROTKB|H8WH74	38.1	2.9e-17	-	CBG24470	GO:0005634	nucleus	cellular_component	6
TRINITY_DN23734_c0_g2	UNIPROTKB|H8WH74	38.1	2.9e-17	-	CBG24470	GO:0005737	cytoplasm	cellular_component	5
TRINITY_DN23734_c0_g2	UNIPROTKB|H8WH74	38.1	2.9e-17	-	CBG24470	GO:0008360	regulation of cell shape	biological_process	8
TRINITY_DN23734_c0_g2	UNIPROTKB|H8WH74	38.1	2.9e-17	-	CBG24470	GO:0018105	peptidyl-serine phosphorylation	biological_process	10
TRINITY_DN23739_c0_g1	UNIPROTKB|F1S5B5	100	7.6e-34	-	ELF3	GO:0000978	RNA polymerase II proximal promoter sequence-specific DNA binding	molecular_function	10
TRINITY_DN23739_c0_g1	UNIPROTKB|F1S5B5	100	7.6e-34	-	ELF3	GO:0000981	RNA polymerase II transcription factor activity, sequence-specific DNA binding	molecular_function	5
TRINITY_DN23739_c0_g1	UNIPROTKB|F1S5B5	100	7.6e-34	-	ELF3	GO:0001824	blastocyst development	biological_process	5
TRINITY_DN23739_c0_g1	UNIPROTKB|F1S5B5	100	7.6e-34	-	ELF3	GO:0003713	transcription coactivator activity	molecular_function	5
TRINITY_DN23739_c0_g1	UNIPROTKB|F1S5B5	100	7.6e-34	-	ELF3	GO:0005634	nucleus	cellular_component	6
TRINITY_DN23739_c0_g1	UNIPROTKB|F1S5B5	100	7.6e-34	-	ELF3	GO:0006357	regulation of transcription by RNA polymerase II	biological_process	9
TRINITY_DN23739_c0_g1	UNIPROTKB|F1S5B5	100	7.6e-34	-	ELF3	GO:0006366	transcription by RNA polymerase II	biological_process	9
TRINITY_DN23739_c0_g1	UNIPROTKB|F1S5B5	100	7.6e-34	-	ELF3	GO:0006954	inflammatory response	biological_process	6
TRINITY_DN23739_c0_g1	UNIPROTKB|F1S5B5	100	7.6e-34	-	ELF3	GO:0030154	cell differentiation	biological_process	5
TRINITY_DN23739_c0_g1	UNIPROTKB|F1S5B5	100	7.6e-34	-	ELF3	GO:0030198	extracellular matrix organization	biological_process	6
TRINITY_DN23739_c0_g1	UNIPROTKB|F1S5B5	100	7.6e-34	-	ELF3	GO:0030855	epithelial cell differentiation	biological_process	6
TRINITY_DN23739_c0_g1	UNIPROTKB|F1S5B5	100	7.6e-34	-	ELF3	GO:0045892	negative regulation of transcription, DNA-templated	biological_process	9
TRINITY_DN23739_c0_g1	UNIPROTKB|F1S5B5	100	7.6e-34	-	ELF3	GO:0045944	positive regulation of transcription by RNA polymerase II	biological_process	10
TRINITY_DN23739_c0_g1	UNIPROTKB|F1S5B5	100	7.6e-34	-	ELF3	GO:0060056	mammary gland involution	biological_process	5
TRINITY_DN23766_c0_g1	UNIPROTKB|Q3T104	100	2.2e-31	615778	SEC61G	GO:0005789	endoplasmic reticulum membrane	cellular_component	5
TRINITY_DN23766_c0_g1	UNIPROTKB|Q3T104	100	2.2e-31	615778	SEC61G	GO:0015450	P-P-bond-hydrolysis-driven protein transmembrane transporter activity	molecular_function	7
TRINITY_DN23766_c0_g1	UNIPROTKB|Q3T104	100	2.2e-31	615778	SEC61G	GO:0016021	integral component of membrane	cellular_component	5
TRINITY_DN23766_c0_g1	UNIPROTKB|Q3T104	100	2.2e-31	615778	SEC61G	GO:0045047	protein targeting to ER	biological_process	12
TRINITY_DN23766_c0_g1	UNIPROTKB|Q3T104	100	2.2e-31	615778	SEC61G	GO:0071806	protein transmembrane transport	biological_process	10
TRINITY_DN23777_c1_g1	TAIR|locus:2057584	42.3	8.1e-16	817950	DRM2	GO:0005634	nucleus	cellular_component	6
TRINITY_DN23777_c1_g1	TAIR|locus:2057584	42.3	8.1e-16	817950	DRM2	GO:0007275	multicellular organism development	biological_process	4
TRINITY_DN23828_c1_g1	UNIPROTKB|P03891	90.7	7.6e-145	4536	MT-ND2	GO:0005743	mitochondrial inner membrane	cellular_component	6
TRINITY_DN23828_c1_g1	UNIPROTKB|P03891	90.7	7.6e-145	4536	MT-ND2	GO:0005747	mitochondrial respiratory chain complex I	cellular_component	7
TRINITY_DN23828_c1_g1	UNIPROTKB|P03891	90.7	7.6e-145	4536	MT-ND2	GO:0006120	mitochondrial electron transport, NADH to ubiquinone	biological_process	8
TRINITY_DN23828_c1_g1	UNIPROTKB|P03891	90.7	7.6e-145	4536	MT-ND2	GO:0008137	NADH dehydrogenase (ubiquinone) activity	molecular_function	8
TRINITY_DN23828_c1_g1	UNIPROTKB|P03891	90.7	7.6e-145	4536	MT-ND2	GO:0014069	postsynaptic density	cellular_component	5
TRINITY_DN23828_c1_g1	UNIPROTKB|P03891	90.7	7.6e-145	4536	MT-ND2	GO:0016021	integral component of membrane	cellular_component	5
TRINITY_DN23828_c1_g1	UNIPROTKB|P03891	90.7	7.6e-145	4536	MT-ND2	GO:0019901	protein kinase binding	molecular_function	7
TRINITY_DN23828_c1_g1	UNIPROTKB|P03891	90.7	7.6e-145	4536	MT-ND2	GO:0032981	mitochondrial respiratory chain complex I assembly	biological_process	9
TRINITY_DN23828_c1_g1	UNIPROTKB|P03891	90.7	7.6e-145	4536	MT-ND2	GO:0035255	ionotropic glutamate receptor binding	molecular_function	7
TRINITY_DN23828_c1_g1	UNIPROTKB|P03891	90.7	7.6e-145	4536	MT-ND2	GO:0072593	reactive oxygen species metabolic process	biological_process	5
TRINITY_DN23946_c0_g1	UNIPROTKB|W4YKD0	55.1	2.5e-08	-	Sp-Plxna4L_4	GO:0002116	semaphorin receptor complex	cellular_component	5
TRINITY_DN23946_c0_g1	UNIPROTKB|W4YKD0	55.1	2.5e-08	-	Sp-Plxna4L_4	GO:0005887	integral component of plasma membrane	cellular_component	6
TRINITY_DN23946_c0_g1	UNIPROTKB|W4YKD0	55.1	2.5e-08	-	Sp-Plxna4L_4	GO:0008045	motor neuron axon guidance	biological_process	7
TRINITY_DN23946_c0_g1	UNIPROTKB|W4YKD0	55.1	2.5e-08	-	Sp-Plxna4L_4	GO:0017154	semaphorin receptor activity	molecular_function	6
TRINITY_DN23946_c0_g1	UNIPROTKB|W4YKD0	55.1	2.5e-08	-	Sp-Plxna4L_4	GO:0030334	regulation of cell migration	biological_process	7
TRINITY_DN23946_c0_g1	UNIPROTKB|W4YKD0	55.1	2.5e-08	-	Sp-Plxna4L_4	GO:0048841	regulation of axon extension involved in axon guidance	biological_process	8
TRINITY_DN23946_c0_g1	UNIPROTKB|W4YKD0	55.1	2.5e-08	-	Sp-Plxna4L_4	GO:1902287	semaphorin-plexin signaling pathway involved in axon guidance	biological_process	8
TRINITY_DN23981_c0_g1	UNIPROTKB|Q5TQM2	67.2	1.4e-18	3291629	AgaP_AGAP008003	GO:0005737	cytoplasm	cellular_component	5
TRINITY_DN24067_c0_g1	UNIPROTKB|F1RKG8	40.7	5.4e-09	100518336	PEBP1	GO:0005634	nucleus	cellular_component	6
TRINITY_DN24067_c0_g1	UNIPROTKB|F1RKG8	40.7	5.4e-09	100518336	PEBP1	GO:0019901	protein kinase binding	molecular_function	7
TRINITY_DN24067_c0_g1	UNIPROTKB|F1RKG8	40.7	5.4e-09	100518336	PEBP1	GO:0070062	extracellular exosome	cellular_component	7
TRINITY_DN24197_c0_g2	RGD|62053	100	5e-42	29276	Csrp1	GO:0003723	RNA binding	molecular_function	6
TRINITY_DN24197_c0_g2	RGD|62053	100	5e-42	29276	Csrp1	GO:0005634	nucleus	cellular_component	6
TRINITY_DN24197_c0_g2	RGD|62053	100	5e-42	29276	Csrp1	GO:0005925	focal adhesion	cellular_component	7
TRINITY_DN24197_c0_g2	RGD|62053	100	5e-42	29276	Csrp1	GO:0007399	nervous system development	biological_process	6
TRINITY_DN24197_c0_g2	RGD|62053	100	5e-42	29276	Csrp1	GO:0046872	metal ion binding	molecular_function	6
TRINITY_DN24197_c0_g2	RGD|62053	100	5e-42	29276	Csrp1	GO:0070062	extracellular exosome	cellular_component	7
TRINITY_DN24197_c0_g2	RGD|62053	100	5e-42	29276	Csrp1	GO:0070527	platelet aggregation	biological_process	7
TRINITY_DN24201_c0_g1	ZFIN|ZDB-GENE-061013-687	55.6	7.3e-13	-	zgc:153522	GO:0003676	nucleic acid binding	molecular_function	5
TRINITY_DN24201_c0_g1	ZFIN|ZDB-GENE-061013-687	55.6	7.3e-13	-	zgc:153522	GO:0005575	cellular_component	cellular_component	2
TRINITY_DN24201_c0_g1	ZFIN|ZDB-GENE-061013-687	55.6	7.3e-13	-	zgc:153522	GO:0015074	DNA integration	biological_process	8
TRINITY_DN24445_c0_g1	UNIPROTKB|B7PWE4	69.4	2e-07	8032355	IscW_ISCW007848	GO:0004104	cholinesterase activity	molecular_function	7
TRINITY_DN24445_c0_g1	UNIPROTKB|B7PWE4	69.4	2e-07	8032355	IscW_ISCW007848	GO:0005615	extracellular space	cellular_component	4
TRINITY_DN24559_c0_g1	FB|FBgn0001321	33.7	3.7e-07	47137	knk	GO:0001838	embryonic epithelial tube formation	biological_process	7
TRINITY_DN24559_c0_g1	FB|FBgn0001321	33.7	3.7e-07	47137	knk	GO:0006031	chitin biosynthetic process	biological_process	8
TRINITY_DN24559_c0_g1	FB|FBgn0001321	33.7	3.7e-07	47137	knk	GO:0006035	cuticle chitin biosynthetic process	biological_process	9
TRINITY_DN24559_c0_g1	FB|FBgn0001321	33.7	3.7e-07	47137	knk	GO:0007362	terminal region determination	biological_process	6
TRINITY_DN24559_c0_g1	FB|FBgn0001321	33.7	3.7e-07	47137	knk	GO:0007424	open tracheal system development	biological_process	7
TRINITY_DN24559_c0_g1	FB|FBgn0001321	33.7	3.7e-07	47137	knk	GO:0008293	torso signaling pathway	biological_process	8
TRINITY_DN24559_c0_g1	FB|FBgn0001321	33.7	3.7e-07	47137	knk	GO:0008362	chitin-based embryonic cuticle biosynthetic process	biological_process	7
TRINITY_DN24559_c0_g1	FB|FBgn0001321	33.7	3.7e-07	47137	knk	GO:0035151	regulation of tube size, open tracheal system	biological_process	7
TRINITY_DN24559_c0_g1	FB|FBgn0001321	33.7	3.7e-07	47137	knk	GO:0035152	regulation of tube architecture, open tracheal system	biological_process	5
TRINITY_DN24559_c0_g1	FB|FBgn0001321	33.7	3.7e-07	47137	knk	GO:0035158	regulation of tube diameter, open tracheal system	biological_process	9
TRINITY_DN24559_c0_g1	FB|FBgn0001321	33.7	3.7e-07	47137	knk	GO:0040003	chitin-based cuticle development	biological_process	6
TRINITY_DN24602_c0_g1	UNIPROTKB|E0CU14	79.7	2e-30	100233043	VIT_12s0028g00930	GO:0004364	glutathione transferase activity	molecular_function	6
TRINITY_DN24602_c0_g1	UNIPROTKB|E0CU14	79.7	2e-30	100233043	VIT_12s0028g00930	GO:0005737	cytoplasm	cellular_component	5
TRINITY_DN24602_c0_g1	UNIPROTKB|E0CU14	79.7	2e-30	100233043	VIT_12s0028g00930	GO:0006749	glutathione metabolic process	biological_process	8
TRINITY_DN24609_c0_g1	UNIPROTKB|D0MYV3	93.5	6.6e-65	9467854	PITG_03916	GO:0003735	structural constituent of ribosome	molecular_function	4
TRINITY_DN24609_c0_g1	UNIPROTKB|D0MYV3	93.5	6.6e-65	9467854	PITG_03916	GO:0006412	translation	biological_process	8
TRINITY_DN24609_c0_g1	UNIPROTKB|D0MYV3	93.5	6.6e-65	9467854	PITG_03916	GO:0022625	cytosolic large ribosomal subunit	cellular_component	8
TRINITY_DN24678_c0_g1	TAIR|locus:505006351	57.4	8.1e-07	820771	MT3	GO:0005507	copper ion binding	molecular_function	8
TRINITY_DN24678_c0_g1	TAIR|locus:505006351	57.4	8.1e-07	820771	MT3	GO:0005576	extracellular region	cellular_component	3
TRINITY_DN24678_c0_g1	TAIR|locus:505006351	57.4	8.1e-07	820771	MT3	GO:0005623	cell	cellular_component	3
TRINITY_DN24678_c0_g1	TAIR|locus:505006351	57.4	8.1e-07	820771	MT3	GO:0006878	cellular copper ion homeostasis	biological_process	12
TRINITY_DN24678_c0_g1	TAIR|locus:505006351	57.4	8.1e-07	820771	MT3	GO:0008270	zinc ion binding	molecular_function	8
TRINITY_DN24772_c0_g1	TAIR|locus:2052811	98.6	1.1e-35	817636	GSTF9	GO:0004364	glutathione transferase activity	molecular_function	6
TRINITY_DN24772_c0_g1	TAIR|locus:2052811	98.6	1.1e-35	817636	GSTF9	GO:0004602	glutathione peroxidase activity	molecular_function	5
TRINITY_DN24772_c0_g1	TAIR|locus:2052811	98.6	1.1e-35	817636	GSTF9	GO:0005507	copper ion binding	molecular_function	8
TRINITY_DN24772_c0_g1	TAIR|locus:2052811	98.6	1.1e-35	817636	GSTF9	GO:0005737	cytoplasm	cellular_component	5
TRINITY_DN24772_c0_g1	TAIR|locus:2052811	98.6	1.1e-35	817636	GSTF9	GO:0005773	vacuole	cellular_component	6
TRINITY_DN24772_c0_g1	TAIR|locus:2052811	98.6	1.1e-35	817636	GSTF9	GO:0005829	cytosol	cellular_component	6
TRINITY_DN24772_c0_g1	TAIR|locus:2052811	98.6	1.1e-35	817636	GSTF9	GO:0005886	plasma membrane	cellular_component	4
TRINITY_DN24772_c0_g1	TAIR|locus:2052811	98.6	1.1e-35	817636	GSTF9	GO:0006749	glutathione metabolic process	biological_process	8
TRINITY_DN24772_c0_g1	TAIR|locus:2052811	98.6	1.1e-35	817636	GSTF9	GO:0006952	defense response	biological_process	5
TRINITY_DN24772_c0_g1	TAIR|locus:2052811	98.6	1.1e-35	817636	GSTF9	GO:0009407	toxin catabolic process	biological_process	6
TRINITY_DN24772_c0_g1	TAIR|locus:2052811	98.6	1.1e-35	817636	GSTF9	GO:0009506	plasmodesma	cellular_component	5
TRINITY_DN24772_c0_g1	TAIR|locus:2052811	98.6	1.1e-35	817636	GSTF9	GO:0009507	chloroplast	cellular_component	7
TRINITY_DN24772_c0_g1	TAIR|locus:2052811	98.6	1.1e-35	817636	GSTF9	GO:0009570	chloroplast stroma	cellular_component	8
TRINITY_DN24772_c0_g1	TAIR|locus:2052811	98.6	1.1e-35	817636	GSTF9	GO:0009579	thylakoid	cellular_component	5
TRINITY_DN24772_c0_g1	TAIR|locus:2052811	98.6	1.1e-35	817636	GSTF9	GO:0010043	response to zinc ion	biological_process	7
TRINITY_DN24772_c0_g1	TAIR|locus:2052811	98.6	1.1e-35	817636	GSTF9	GO:0042742	defense response to bacterium	biological_process	8
TRINITY_DN24772_c0_g1	TAIR|locus:2052811	98.6	1.1e-35	817636	GSTF9	GO:0043295	glutathione binding	molecular_function	6
TRINITY_DN24772_c0_g1	TAIR|locus:2052811	98.6	1.1e-35	817636	GSTF9	GO:0046686	response to cadmium ion	biological_process	7
TRINITY_DN24772_c0_g1	TAIR|locus:2052811	98.6	1.1e-35	817636	GSTF9	GO:0048046	apoplast	cellular_component	4
TRINITY_DN24772_c0_g1	TAIR|locus:2052811	98.6	1.1e-35	817636	GSTF9	GO:0055114	oxidation-reduction process	biological_process	4
TRINITY_DN24966_c0_g1	ZFIN|ZDB-GENE-080218-30	58.1	1.8e-08	571365	gstm.2	GO:0004364	glutathione transferase activity	molecular_function	6
TRINITY_DN24966_c0_g1	ZFIN|ZDB-GENE-080218-30	58.1	1.8e-08	571365	gstm.2	GO:0005575	cellular_component	cellular_component	2
TRINITY_DN24966_c0_g1	ZFIN|ZDB-GENE-080218-30	58.1	1.8e-08	571365	gstm.2	GO:0008152	metabolic process	biological_process	3
TRINITY_DN25293_c0_g1	MGI|MGI:1913838	100	6.1e-38	66588	Cmpk1	GO:0000166	nucleotide binding	molecular_function	5
TRINITY_DN25293_c0_g1	MGI|MGI:1913838	100	6.1e-38	66588	Cmpk1	GO:0004127	cytidylate kinase activity	molecular_function	8
TRINITY_DN25293_c0_g1	MGI|MGI:1913838	100	6.1e-38	66588	Cmpk1	GO:0004550	nucleoside diphosphate kinase activity	molecular_function	7
TRINITY_DN25293_c0_g1	MGI|MGI:1913838	100	6.1e-38	66588	Cmpk1	GO:0005524	ATP binding	molecular_function	5
TRINITY_DN25293_c0_g1	MGI|MGI:1913838	100	6.1e-38	66588	Cmpk1	GO:0005634	nucleus	cellular_component	6
TRINITY_DN25293_c0_g1	MGI|MGI:1913838	100	6.1e-38	66588	Cmpk1	GO:0005730	nucleolus	cellular_component	6
TRINITY_DN25293_c0_g1	MGI|MGI:1913838	100	6.1e-38	66588	Cmpk1	GO:0005737	cytoplasm	cellular_component	5
TRINITY_DN25293_c0_g1	MGI|MGI:1913838	100	6.1e-38	66588	Cmpk1	GO:0006139	nucleobase-containing compound metabolic process	biological_process	6
TRINITY_DN25293_c0_g1	MGI|MGI:1913838	100	6.1e-38	66588	Cmpk1	GO:0006165	nucleoside diphosphate phosphorylation	biological_process	9
TRINITY_DN25293_c0_g1	MGI|MGI:1913838	100	6.1e-38	66588	Cmpk1	GO:0006207	'de novo' pyrimidine nucleobase biosynthetic process	biological_process	11
TRINITY_DN25293_c0_g1	MGI|MGI:1913838	100	6.1e-38	66588	Cmpk1	GO:0006221	pyrimidine nucleotide biosynthetic process	biological_process	10
TRINITY_DN25293_c0_g1	MGI|MGI:1913838	100	6.1e-38	66588	Cmpk1	GO:0006225	UDP biosynthetic process	biological_process	12
TRINITY_DN25293_c0_g1	MGI|MGI:1913838	100	6.1e-38	66588	Cmpk1	GO:0006227	dUDP biosynthetic process	biological_process	12
TRINITY_DN25293_c0_g1	MGI|MGI:1913838	100	6.1e-38	66588	Cmpk1	GO:0006240	dCDP biosynthetic process	biological_process	12
TRINITY_DN25293_c0_g1	MGI|MGI:1913838	100	6.1e-38	66588	Cmpk1	GO:0009041	uridylate kinase activity	molecular_function	8
TRINITY_DN25293_c0_g1	MGI|MGI:1913838	100	6.1e-38	66588	Cmpk1	GO:0009142	nucleoside triphosphate biosynthetic process	biological_process	9
TRINITY_DN25293_c0_g1	MGI|MGI:1913838	100	6.1e-38	66588	Cmpk1	GO:0016301	kinase activity	molecular_function	6
TRINITY_DN25293_c0_g1	MGI|MGI:1913838	100	6.1e-38	66588	Cmpk1	GO:0016310	phosphorylation	biological_process	7
TRINITY_DN25293_c0_g1	MGI|MGI:1913838	100	6.1e-38	66588	Cmpk1	GO:0016740	transferase activity	molecular_function	4
TRINITY_DN25293_c0_g1	MGI|MGI:1913838	100	6.1e-38	66588	Cmpk1	GO:0019205	nucleobase-containing compound kinase activity	molecular_function	7
TRINITY_DN25293_c0_g1	MGI|MGI:1913838	100	6.1e-38	66588	Cmpk1	GO:0033862	UMP kinase activity	molecular_function	9
TRINITY_DN25293_c0_g1	MGI|MGI:1913838	100	6.1e-38	66588	Cmpk1	GO:0046705	CDP biosynthetic process	biological_process	12
TRINITY_DN25293_c0_g1	MGI|MGI:1913838	100	6.1e-38	66588	Cmpk1	GO:0046940	nucleoside monophosphate phosphorylation	biological_process	9
TRINITY_DN25293_c0_g1	MGI|MGI:1913838	100	6.1e-38	66588	Cmpk1	GO:0050145	nucleoside phosphate kinase activity	molecular_function	7
TRINITY_DN25300_c0_g1	UNIPROTKB|F6Q412	100	3.3e-45	100400251	LOC100400251	GO:0003680	AT DNA binding	molecular_function	9
TRINITY_DN25300_c0_g1	UNIPROTKB|F6Q412	100	3.3e-45	100400251	LOC100400251	GO:0005737	cytoplasm	cellular_component	5
TRINITY_DN25300_c0_g1	UNIPROTKB|F6Q412	100	3.3e-45	100400251	LOC100400251	GO:0008270	zinc ion binding	molecular_function	8
TRINITY_DN25300_c0_g1	UNIPROTKB|F6Q412	100	3.3e-45	100400251	LOC100400251	GO:0008301	DNA binding, bending	molecular_function	7
TRINITY_DN25300_c0_g1	UNIPROTKB|F6Q412	100	3.3e-45	100400251	LOC100400251	GO:0008630	intrinsic apoptotic signaling pathway in response to DNA damage	biological_process	7
TRINITY_DN25300_c0_g1	UNIPROTKB|F6Q412	100	3.3e-45	100400251	LOC100400251	GO:0010043	response to zinc ion	biological_process	7
TRINITY_DN25300_c0_g1	UNIPROTKB|F6Q412	100	3.3e-45	100400251	LOC100400251	GO:0042277	peptide binding	molecular_function	5
TRINITY_DN25300_c0_g1	UNIPROTKB|F6Q412	100	3.3e-45	100400251	LOC100400251	GO:0071236	cellular response to antibiotic	biological_process	6
TRINITY_DN25300_c0_g1	UNIPROTKB|F6Q412	100	3.3e-45	100400251	LOC100400251	GO:0071493	cellular response to UV-B	biological_process	9
TRINITY_DN2549_c0_g1	TAIR|locus:2079221	51.5	1.5e-10	822242	AT3G26380	GO:0004557	alpha-galactosidase activity	molecular_function	8
TRINITY_DN2549_c0_g1	TAIR|locus:2079221	51.5	1.5e-10	822242	AT3G26380	GO:0005576	extracellular region	cellular_component	3
TRINITY_DN2549_c0_g1	TAIR|locus:2079221	51.5	1.5e-10	822242	AT3G26380	GO:0005618	cell wall	cellular_component	5
TRINITY_DN2549_c0_g1	TAIR|locus:2079221	51.5	1.5e-10	822242	AT3G26380	GO:0005829	cytosol	cellular_component	6
TRINITY_DN25553_c0_g1	UNIPROTKB|P19957	100	5.7e-37	5266	PI3	GO:0001533	cornified envelope	cellular_component	5
TRINITY_DN25553_c0_g1	UNIPROTKB|P19957	100	5.7e-37	5266	PI3	GO:0004866	endopeptidase inhibitor activity	molecular_function	7
TRINITY_DN25553_c0_g1	UNIPROTKB|P19957	100	5.7e-37	5266	PI3	GO:0004867	serine-type endopeptidase inhibitor activity	molecular_function	8
TRINITY_DN25553_c0_g1	UNIPROTKB|P19957	100	5.7e-37	5266	PI3	GO:0005576	extracellular region	cellular_component	3
TRINITY_DN25553_c0_g1	UNIPROTKB|P19957	100	5.7e-37	5266	PI3	GO:0005829	cytosol	cellular_component	6
TRINITY_DN25553_c0_g1	UNIPROTKB|P19957	100	5.7e-37	5266	PI3	GO:0007620	copulation	biological_process	6
TRINITY_DN25553_c0_g1	UNIPROTKB|P19957	100	5.7e-37	5266	PI3	GO:0010951	negative regulation of endopeptidase activity	biological_process	11
TRINITY_DN25553_c0_g1	UNIPROTKB|P19957	100	5.7e-37	5266	PI3	GO:0019730	antimicrobial humoral response	biological_process	6
TRINITY_DN25553_c0_g1	UNIPROTKB|P19957	100	5.7e-37	5266	PI3	GO:0070062	extracellular exosome	cellular_component	7
TRINITY_DN25553_c0_g1	UNIPROTKB|P19957	100	5.7e-37	5266	PI3	GO:0070268	cornification	biological_process	6
TRINITY_DN25793_c0_g3	MGI|MGI:87984	91.1	1.1e-36	-	Akp3	GO:0000287	magnesium ion binding	molecular_function	7
TRINITY_DN25793_c0_g3	MGI|MGI:87984	91.1	1.1e-36	-	Akp3	GO:0002020	protease binding	molecular_function	6
TRINITY_DN25793_c0_g3	MGI|MGI:87984	91.1	1.1e-36	-	Akp3	GO:0004035	alkaline phosphatase activity	molecular_function	8
TRINITY_DN25793_c0_g3	MGI|MGI:87984	91.1	1.1e-36	-	Akp3	GO:0005886	plasma membrane	cellular_component	4
TRINITY_DN25793_c0_g3	MGI|MGI:87984	91.1	1.1e-36	-	Akp3	GO:0005903	brush border	cellular_component	5
TRINITY_DN25793_c0_g3	MGI|MGI:87984	91.1	1.1e-36	-	Akp3	GO:0006793	phosphorus metabolic process	biological_process	5
TRINITY_DN25793_c0_g3	MGI|MGI:87984	91.1	1.1e-36	-	Akp3	GO:0008270	zinc ion binding	molecular_function	8
TRINITY_DN25793_c0_g3	MGI|MGI:87984	91.1	1.1e-36	-	Akp3	GO:0009897	external side of plasma membrane	cellular_component	5
TRINITY_DN25793_c0_g3	MGI|MGI:87984	91.1	1.1e-36	-	Akp3	GO:0021915	neural tube development	biological_process	6
TRINITY_DN25793_c0_g3	MGI|MGI:87984	91.1	1.1e-36	-	Akp3	GO:0022008	neurogenesis	biological_process	6
TRINITY_DN25793_c0_g3	MGI|MGI:87984	91.1	1.1e-36	-	Akp3	GO:0035264	multicellular organism growth	biological_process	4
TRINITY_DN25793_c0_g3	MGI|MGI:87984	91.1	1.1e-36	-	Akp3	GO:0036342	post-anal tail morphogenesis	biological_process	5
TRINITY_DN25980_c0_g1	UNIPROTKB|P85524	64.3	6.6e-33	-	P85524	GO:0016068	type I hypersensitivity	biological_process	10
TRINITY_DN26064_c0_g1	UNIPROTKB|Q12889	40.4	5.8e-07	5016	OVGP1	GO:0004568	chitinase activity	molecular_function	7
TRINITY_DN26064_c0_g1	UNIPROTKB|Q12889	40.4	5.8e-07	5016	OVGP1	GO:0005576	extracellular region	cellular_component	3
TRINITY_DN26064_c0_g1	UNIPROTKB|Q12889	40.4	5.8e-07	5016	OVGP1	GO:0005737	cytoplasm	cellular_component	5
TRINITY_DN26064_c0_g1	UNIPROTKB|Q12889	40.4	5.8e-07	5016	OVGP1	GO:0005829	cytosol	cellular_component	6
TRINITY_DN26064_c0_g1	UNIPROTKB|Q12889	40.4	5.8e-07	5016	OVGP1	GO:0005975	carbohydrate metabolic process	biological_process	5
TRINITY_DN26064_c0_g1	UNIPROTKB|Q12889	40.4	5.8e-07	5016	OVGP1	GO:0006032	chitin catabolic process	biological_process	8
TRINITY_DN26064_c0_g1	UNIPROTKB|Q12889	40.4	5.8e-07	5016	OVGP1	GO:0007339	binding of sperm to zona pellucida	biological_process	7
TRINITY_DN26064_c0_g1	UNIPROTKB|Q12889	40.4	5.8e-07	5016	OVGP1	GO:0007565	female pregnancy	biological_process	5
TRINITY_DN26064_c0_g1	UNIPROTKB|Q12889	40.4	5.8e-07	5016	OVGP1	GO:0008061	chitin binding	molecular_function	5
TRINITY_DN26064_c0_g1	UNIPROTKB|Q12889	40.4	5.8e-07	5016	OVGP1	GO:0030133	transport vesicle	cellular_component	7
TRINITY_DN26064_c0_g1	UNIPROTKB|Q12889	40.4	5.8e-07	5016	OVGP1	GO:0035805	egg coat	cellular_component	5
TRINITY_DN26064_c0_g1	UNIPROTKB|Q12889	40.4	5.8e-07	5016	OVGP1	GO:0098595	perivitelline space	cellular_component	4
TRINITY_DN26064_c0_g1	UNIPROTKB|Q12889	40.4	5.8e-07	5016	OVGP1	GO:2000360	negative regulation of binding of sperm to zona pellucida	biological_process	7
TRINITY_DN26174_c0_g1	MGI|MGI:1316732	30.5	3e-07	12722	Clca3a1	GO:0005229	intracellular calcium activated chloride channel activity	molecular_function	7
TRINITY_DN26174_c0_g1	MGI|MGI:1316732	30.5	3e-07	12722	Clca3a1	GO:0005886	plasma membrane	cellular_component	4
TRINITY_DN26174_c0_g1	MGI|MGI:1316732	30.5	3e-07	12722	Clca3a1	GO:0005887	integral component of plasma membrane	cellular_component	6
TRINITY_DN26174_c0_g1	MGI|MGI:1316732	30.5	3e-07	12722	Clca3a1	GO:0006508	proteolysis	biological_process	7
TRINITY_DN26174_c0_g1	MGI|MGI:1316732	30.5	3e-07	12722	Clca3a1	GO:0006811	ion transport	biological_process	6
TRINITY_DN26174_c0_g1	MGI|MGI:1316732	30.5	3e-07	12722	Clca3a1	GO:0006821	chloride transport	biological_process	9
TRINITY_DN26174_c0_g1	MGI|MGI:1316732	30.5	3e-07	12722	Clca3a1	GO:0008233	peptidase activity	molecular_function	5
TRINITY_DN26174_c0_g1	MGI|MGI:1316732	30.5	3e-07	12722	Clca3a1	GO:0008237	metallopeptidase activity	molecular_function	7
TRINITY_DN26174_c0_g1	MGI|MGI:1316732	30.5	3e-07	12722	Clca3a1	GO:0016020	membrane	cellular_component	3
TRINITY_DN26174_c0_g1	MGI|MGI:1316732	30.5	3e-07	12722	Clca3a1	GO:0016787	hydrolase activity	molecular_function	4
TRINITY_DN26174_c0_g1	MGI|MGI:1316732	30.5	3e-07	12722	Clca3a1	GO:0046872	metal ion binding	molecular_function	6
TRINITY_DN26238_c0_g1	UNIPROTKB|W4XCY0	31.1	1.4e-09	-	Sp-Vps13a	GO:0005622	intracellular	cellular_component	4
TRINITY_DN26238_c0_g1	UNIPROTKB|W4XCY0	31.1	1.4e-09	-	Sp-Vps13a	GO:0006623	protein targeting to vacuole	biological_process	12
TRINITY_DN26238_c0_g1	UNIPROTKB|W4XCY0	31.1	1.4e-09	-	Sp-Vps13a	GO:0019898	extrinsic component of membrane	cellular_component	4
TRINITY_DN26238_c0_g1	UNIPROTKB|W4XCY0	31.1	1.4e-09	-	Sp-Vps13a	GO:0045053	protein retention in Golgi apparatus	biological_process	7
TRINITY_DN26361_c0_g1	UNIPROTKB|F1MDR7	74.2	6.2e-39	504472	DNAJC13	GO:0001649	osteoblast differentiation	biological_process	6
TRINITY_DN26361_c0_g1	UNIPROTKB|F1MDR7	74.2	6.2e-39	504472	DNAJC13	GO:0005765	lysosomal membrane	cellular_component	9
TRINITY_DN26361_c0_g1	UNIPROTKB|F1MDR7	74.2	6.2e-39	504472	DNAJC13	GO:0007032	endosome organization	biological_process	7
TRINITY_DN26361_c0_g1	UNIPROTKB|F1MDR7	74.2	6.2e-39	504472	DNAJC13	GO:0031901	early endosome membrane	cellular_component	9
TRINITY_DN26361_c0_g1	UNIPROTKB|F1MDR7	74.2	6.2e-39	504472	DNAJC13	GO:0070062	extracellular exosome	cellular_component	7
TRINITY_DN26361_c0_g1	UNIPROTKB|F1MDR7	74.2	6.2e-39	504472	DNAJC13	GO:0071203	WASH complex	cellular_component	4
TRINITY_DN26361_c0_g1	UNIPROTKB|F1MDR7	74.2	6.2e-39	504472	DNAJC13	GO:1902954	regulation of early endosome to recycling endosome transport	biological_process	7
TRINITY_DN26361_c0_g1	UNIPROTKB|F1MDR7	74.2	6.2e-39	504472	DNAJC13	GO:2000641	regulation of early endosome to late endosome transport	biological_process	7
TRINITY_DN26474_c0_g1	TAIR|locus:2057584	95.4	2.8e-55	817950	DRM2	GO:0005634	nucleus	cellular_component	6
TRINITY_DN26474_c0_g1	TAIR|locus:2057584	95.4	2.8e-55	817950	DRM2	GO:0007275	multicellular organism development	biological_process	4
TRINITY_DN26527_c0_g1	UNIPROTKB|D0RLW4	82.1	4.4e-98	9468501	PITG_22135	GO:0000470	maturation of LSU-rRNA	biological_process	12
TRINITY_DN26527_c0_g1	UNIPROTKB|D0RLW4	82.1	4.4e-98	9468501	PITG_22135	GO:0003723	RNA binding	molecular_function	6
TRINITY_DN26527_c0_g1	UNIPROTKB|D0RLW4	82.1	4.4e-98	9468501	PITG_22135	GO:0006412	translation	biological_process	8
TRINITY_DN26527_c0_g1	UNIPROTKB|D0RLW4	82.1	4.4e-98	9468501	PITG_22135	GO:0022625	cytosolic large ribosomal subunit	cellular_component	8
TRINITY_DN26552_c0_g2	MGI|MGI:1334462	100	3.8e-33	12847	Copa	GO:0005179	hormone activity	molecular_function	7
TRINITY_DN26552_c0_g2	MGI|MGI:1334462	100	3.8e-33	12847	Copa	GO:0005198	structural molecule activity	molecular_function	3
TRINITY_DN26552_c0_g2	MGI|MGI:1334462	100	3.8e-33	12847	Copa	GO:0005576	extracellular region	cellular_component	3
TRINITY_DN26552_c0_g2	MGI|MGI:1334462	100	3.8e-33	12847	Copa	GO:0005615	extracellular space	cellular_component	4
TRINITY_DN26552_c0_g2	MGI|MGI:1334462	100	3.8e-33	12847	Copa	GO:0005737	cytoplasm	cellular_component	5
TRINITY_DN26552_c0_g2	MGI|MGI:1334462	100	3.8e-33	12847	Copa	GO:0005794	Golgi apparatus	cellular_component	6
TRINITY_DN26552_c0_g2	MGI|MGI:1334462	100	3.8e-33	12847	Copa	GO:0006886	intracellular protein transport	biological_process	10
TRINITY_DN26552_c0_g2	MGI|MGI:1334462	100	3.8e-33	12847	Copa	GO:0006888	ER to Golgi vesicle-mediated transport	biological_process	7
TRINITY_DN26552_c0_g2	MGI|MGI:1334462	100	3.8e-33	12847	Copa	GO:0006890	retrograde vesicle-mediated transport, Golgi to ER	biological_process	8
TRINITY_DN26552_c0_g2	MGI|MGI:1334462	100	3.8e-33	12847	Copa	GO:0006891	intra-Golgi vesicle-mediated transport	biological_process	8
TRINITY_DN26552_c0_g2	MGI|MGI:1334462	100	3.8e-33	12847	Copa	GO:0015031	protein transport	biological_process	9
TRINITY_DN26552_c0_g2	MGI|MGI:1334462	100	3.8e-33	12847	Copa	GO:0016020	membrane	cellular_component	3
TRINITY_DN26552_c0_g2	MGI|MGI:1334462	100	3.8e-33	12847	Copa	GO:0016192	vesicle-mediated transport	biological_process	6
TRINITY_DN26552_c0_g2	MGI|MGI:1334462	100	3.8e-33	12847	Copa	GO:0030117	membrane coat	cellular_component	6
TRINITY_DN26552_c0_g2	MGI|MGI:1334462	100	3.8e-33	12847	Copa	GO:0030126	COPI vesicle coat	cellular_component	8
TRINITY_DN26552_c0_g2	MGI|MGI:1334462	100	3.8e-33	12847	Copa	GO:0030157	pancreatic juice secretion	biological_process	8
TRINITY_DN26552_c0_g2	MGI|MGI:1334462	100	3.8e-33	12847	Copa	GO:0031410	cytoplasmic vesicle	cellular_component	6
TRINITY_DN2655_c0_g1	UNIPROTKB|Q7XZX4	94.6	1.2e-28	4350976	Os11g0634500	GO:0003735	structural constituent of ribosome	molecular_function	4
TRINITY_DN2655_c0_g1	UNIPROTKB|Q7XZX4	94.6	1.2e-28	4350976	Os11g0634500	GO:0008270	zinc ion binding	molecular_function	8
TRINITY_DN2655_c0_g1	UNIPROTKB|Q7XZX4	94.6	1.2e-28	4350976	Os11g0634500	GO:0022627	cytosolic small ribosomal subunit	cellular_component	8
TRINITY_DN2663_c0_g1	FB|FBgn0037069	42.7	8.2e-12	40355	Cpr78Cc	GO:0008010	structural constituent of chitin-based larval cuticle	molecular_function	6
TRINITY_DN2663_c0_g1	FB|FBgn0037069	42.7	8.2e-12	40355	Cpr78Cc	GO:0031012	extracellular matrix	cellular_component	4
TRINITY_DN2663_c0_g1	FB|FBgn0037069	42.7	8.2e-12	40355	Cpr78Cc	GO:0040003	chitin-based cuticle development	biological_process	6
TRINITY_DN2663_c0_g1	FB|FBgn0037069	42.7	8.2e-12	40355	Cpr78Cc	GO:0042302	structural constituent of cuticle	molecular_function	4
TRINITY_DN26702_c0_g1	FB|FBgn0034919	51.8	2.2e-35	37783	CG5569	GO:0005739	mitochondrion	cellular_component	6
TRINITY_DN26702_c0_g1	FB|FBgn0034919	51.8	2.2e-35	37783	CG5569	GO:0005743	mitochondrial inner membrane	cellular_component	6
TRINITY_DN26702_c0_g1	FB|FBgn0034919	51.8	2.2e-35	37783	CG5569	GO:0032981	mitochondrial respiratory chain complex I assembly	biological_process	9
TRINITY_DN26961_c0_g1	ZFIN|ZDB-GENE-040426-977	28.7	9.8e-07	393196	rpa3	GO:0003677	DNA binding	molecular_function	6
TRINITY_DN26961_c0_g1	ZFIN|ZDB-GENE-040426-977	28.7	9.8e-07	393196	rpa3	GO:0005634	nucleus	cellular_component	6
TRINITY_DN26961_c0_g1	ZFIN|ZDB-GENE-040426-977	28.7	9.8e-07	393196	rpa3	GO:0006260	DNA replication	biological_process	8
TRINITY_DN26961_c0_g1	ZFIN|ZDB-GENE-040426-977	28.7	9.8e-07	393196	rpa3	GO:0006281	DNA repair	biological_process	8
TRINITY_DN26961_c0_g1	ZFIN|ZDB-GENE-040426-977	28.7	9.8e-07	393196	rpa3	GO:0006310	DNA recombination	biological_process	8
TRINITY_DN27115_c0_g1	ASPGD|ASPL0000342845	40.3	1.2e-07	5995393	AO090701000500	GO:0003674	molecular_function	molecular_function	2
TRINITY_DN27115_c0_g1	ASPGD|ASPL0000342845	40.3	1.2e-07	5995393	AO090701000500	GO:0005575	cellular_component	cellular_component	2
TRINITY_DN27115_c0_g1	ASPGD|ASPL0000342845	40.3	1.2e-07	5995393	AO090701000500	GO:0008150	biological_process	biological_process	2
TRINITY_DN27163_c0_g1	MGI|MGI:1201412	30.8	8.3e-34	19682	Rdh5	GO:0005783	endoplasmic reticulum	cellular_component	6
TRINITY_DN27163_c0_g1	MGI|MGI:1201412	30.8	8.3e-34	19682	Rdh5	GO:0005788	endoplasmic reticulum lumen	cellular_component	7
TRINITY_DN27163_c0_g1	MGI|MGI:1201412	30.8	8.3e-34	19682	Rdh5	GO:0007601	visual perception	biological_process	8
TRINITY_DN27163_c0_g1	MGI|MGI:1201412	30.8	8.3e-34	19682	Rdh5	GO:0016020	membrane	cellular_component	3
TRINITY_DN27163_c0_g1	MGI|MGI:1201412	30.8	8.3e-34	19682	Rdh5	GO:0016491	oxidoreductase activity	molecular_function	4
TRINITY_DN27163_c0_g1	MGI|MGI:1201412	30.8	8.3e-34	19682	Rdh5	GO:0044297	cell body	cellular_component	4
TRINITY_DN27163_c0_g1	MGI|MGI:1201412	30.8	8.3e-34	19682	Rdh5	GO:0050896	response to stimulus	biological_process	3
TRINITY_DN27163_c0_g1	MGI|MGI:1201412	30.8	8.3e-34	19682	Rdh5	GO:0055114	oxidation-reduction process	biological_process	4
TRINITY_DN27276_c0_g2	MGI|MGI:96778	100	3.3e-11	-	Lgals3	GO:0001501	skeletal system development	biological_process	6
TRINITY_DN27276_c0_g2	MGI|MGI:96778	100	3.3e-11	-	Lgals3	GO:0001772	immunological synapse	cellular_component	5
TRINITY_DN27276_c0_g2	MGI|MGI:96778	100	3.3e-11	-	Lgals3	GO:0002376	immune system process	biological_process	3
TRINITY_DN27276_c0_g2	MGI|MGI:96778	100	3.3e-11	-	Lgals3	GO:0002548	monocyte chemotaxis	biological_process	6
TRINITY_DN27276_c0_g2	MGI|MGI:96778	100	3.3e-11	-	Lgals3	GO:0005515	protein binding	molecular_function	4
TRINITY_DN27276_c0_g2	MGI|MGI:96778	100	3.3e-11	-	Lgals3	GO:0005576	extracellular region	cellular_component	3
TRINITY_DN27276_c0_g2	MGI|MGI:96778	100	3.3e-11	-	Lgals3	GO:0005615	extracellular space	cellular_component	4
TRINITY_DN27276_c0_g2	MGI|MGI:96778	100	3.3e-11	-	Lgals3	GO:0005634	nucleus	cellular_component	6
TRINITY_DN27276_c0_g2	MGI|MGI:96778	100	3.3e-11	-	Lgals3	GO:0005681	spliceosomal complex	cellular_component	6
TRINITY_DN27276_c0_g2	MGI|MGI:96778	100	3.3e-11	-	Lgals3	GO:0005737	cytoplasm	cellular_component	5
TRINITY_DN27276_c0_g2	MGI|MGI:96778	100	3.3e-11	-	Lgals3	GO:0005743	mitochondrial inner membrane	cellular_component	6
TRINITY_DN27276_c0_g2	MGI|MGI:96778	100	3.3e-11	-	Lgals3	GO:0006397	mRNA processing	biological_process	10
TRINITY_DN27276_c0_g2	MGI|MGI:96778	100	3.3e-11	-	Lgals3	GO:0008284	positive regulation of cell proliferation	biological_process	7
TRINITY_DN27276_c0_g2	MGI|MGI:96778	100	3.3e-11	-	Lgals3	GO:0008380	RNA splicing	biological_process	10
TRINITY_DN27276_c0_g2	MGI|MGI:96778	100	3.3e-11	-	Lgals3	GO:0009897	external side of plasma membrane	cellular_component	5
TRINITY_DN27276_c0_g2	MGI|MGI:96778	100	3.3e-11	-	Lgals3	GO:0009986	cell surface	cellular_component	4
TRINITY_DN27276_c0_g2	MGI|MGI:96778	100	3.3e-11	-	Lgals3	GO:0014064	positive regulation of serotonin secretion	biological_process	9
TRINITY_DN27276_c0_g2	MGI|MGI:96778	100	3.3e-11	-	Lgals3	GO:0019863	IgE binding	molecular_function	6
TRINITY_DN27276_c0_g2	MGI|MGI:96778	100	3.3e-11	-	Lgals3	GO:0030154	cell differentiation	biological_process	5
TRINITY_DN27276_c0_g2	MGI|MGI:96778	100	3.3e-11	-	Lgals3	GO:0030198	extracellular matrix organization	biological_process	6
TRINITY_DN27276_c0_g2	MGI|MGI:96778	100	3.3e-11	-	Lgals3	GO:0030246	carbohydrate binding	molecular_function	4
TRINITY_DN27276_c0_g2	MGI|MGI:96778	100	3.3e-11	-	Lgals3	GO:0030593	neutrophil chemotaxis	biological_process	7
TRINITY_DN27276_c0_g2	MGI|MGI:96778	100	3.3e-11	-	Lgals3	GO:0031012	extracellular matrix	cellular_component	4
TRINITY_DN27276_c0_g2	MGI|MGI:96778	100	3.3e-11	-	Lgals3	GO:0034988	Fc-gamma receptor I complex binding	molecular_function	7
TRINITY_DN27276_c0_g2	MGI|MGI:96778	100	3.3e-11	-	Lgals3	GO:0042056	chemoattractant activity	molecular_function	7
TRINITY_DN27276_c0_g2	MGI|MGI:96778	100	3.3e-11	-	Lgals3	GO:0042129	regulation of T cell proliferation	biological_process	10
TRINITY_DN27276_c0_g2	MGI|MGI:96778	100	3.3e-11	-	Lgals3	GO:0043066	negative regulation of apoptotic process	biological_process	9
TRINITY_DN27276_c0_g2	MGI|MGI:96778	100	3.3e-11	-	Lgals3	GO:0043236	laminin binding	molecular_function	5
TRINITY_DN27276_c0_g2	MGI|MGI:96778	100	3.3e-11	-	Lgals3	GO:0045087	innate immune response	biological_process	5
TRINITY_DN27276_c0_g2	MGI|MGI:96778	100	3.3e-11	-	Lgals3	GO:0045185	maintenance of protein location	biological_process	5
TRINITY_DN27276_c0_g2	MGI|MGI:96778	100	3.3e-11	-	Lgals3	GO:0045766	positive regulation of angiogenesis	biological_process	8
TRINITY_DN27276_c0_g2	MGI|MGI:96778	100	3.3e-11	-	Lgals3	GO:0045806	negative regulation of endocytosis	biological_process	8
TRINITY_DN27276_c0_g2	MGI|MGI:96778	100	3.3e-11	-	Lgals3	GO:0048029	monosaccharide binding	molecular_function	5
TRINITY_DN27276_c0_g2	MGI|MGI:96778	100	3.3e-11	-	Lgals3	GO:0048030	disaccharide binding	molecular_function	6
TRINITY_DN27276_c0_g2	MGI|MGI:96778	100	3.3e-11	-	Lgals3	GO:0048245	eosinophil chemotaxis	biological_process	7
TRINITY_DN27276_c0_g2	MGI|MGI:96778	100	3.3e-11	-	Lgals3	GO:0048246	macrophage chemotaxis	biological_process	6
TRINITY_DN27276_c0_g2	MGI|MGI:96778	100	3.3e-11	-	Lgals3	GO:0050785	advanced glycation end-product receptor activity	molecular_function	5
TRINITY_DN27276_c0_g2	MGI|MGI:96778	100	3.3e-11	-	Lgals3	GO:0050860	negative regulation of T cell receptor signaling pathway	biological_process	10
TRINITY_DN27276_c0_g2	MGI|MGI:96778	100	3.3e-11	-	Lgals3	GO:0050918	positive chemotaxis	biological_process	6
TRINITY_DN27276_c0_g2	MGI|MGI:96778	100	3.3e-11	-	Lgals3	GO:0070232	regulation of T cell apoptotic process	biological_process	11
TRINITY_DN27276_c0_g2	MGI|MGI:96778	100	3.3e-11	-	Lgals3	GO:0071674	mononuclear cell migration	biological_process	5
TRINITY_DN27276_c0_g2	MGI|MGI:96778	100	3.3e-11	-	Lgals3	GO:0071677	positive regulation of mononuclear cell migration	biological_process	8
TRINITY_DN27276_c0_g2	MGI|MGI:96778	100	3.3e-11	-	Lgals3	GO:0090280	positive regulation of calcium ion import	biological_process	10
TRINITY_DN27276_c0_g2	MGI|MGI:96778	100	3.3e-11	-	Lgals3	GO:0097386	glial cell projection	cellular_component	6
TRINITY_DN27276_c0_g2	MGI|MGI:96778	100	3.3e-11	-	Lgals3	GO:1902041	regulation of extrinsic apoptotic signaling pathway via death domain receptors	biological_process	10
TRINITY_DN27276_c0_g2	MGI|MGI:96778	100	3.3e-11	-	Lgals3	GO:1903769	negative regulation of cell proliferation in bone marrow	biological_process	8
TRINITY_DN27276_c0_g2	MGI|MGI:96778	100	3.3e-11	-	Lgals3	GO:2000521	negative regulation of immunological synapse formation	biological_process	9
TRINITY_DN27276_c0_g2	MGI|MGI:96778	100	3.3e-11	-	Lgals3	GO:2001189	negative regulation of T cell activation via T cell receptor contact with antigen bound to MHC molecule on antigen presenting cell	biological_process	8
TRINITY_DN27276_c0_g2	MGI|MGI:96778	100	3.3e-11	-	Lgals3	GO:2001237	negative regulation of extrinsic apoptotic signaling pathway	biological_process	10
TRINITY_DN27282_c0_g1	MGI|MGI:107709	100	4.7e-33	17922	Myo7b	GO:0000166	nucleotide binding	molecular_function	5
TRINITY_DN27282_c0_g1	MGI|MGI:107709	100	4.7e-33	17922	Myo7b	GO:0003774	motor activity	molecular_function	9
TRINITY_DN27282_c0_g1	MGI|MGI:107709	100	4.7e-33	17922	Myo7b	GO:0003779	actin binding	molecular_function	6
TRINITY_DN27282_c0_g1	MGI|MGI:107709	100	4.7e-33	17922	Myo7b	GO:0005524	ATP binding	molecular_function	5
TRINITY_DN27282_c0_g1	MGI|MGI:107709	100	4.7e-33	17922	Myo7b	GO:0005737	cytoplasm	cellular_component	5
TRINITY_DN27282_c0_g1	MGI|MGI:107709	100	4.7e-33	17922	Myo7b	GO:0005856	cytoskeleton	cellular_component	6
TRINITY_DN27282_c0_g1	MGI|MGI:107709	100	4.7e-33	17922	Myo7b	GO:0005902	microvillus	cellular_component	7
TRINITY_DN27282_c0_g1	MGI|MGI:107709	100	4.7e-33	17922	Myo7b	GO:0005903	brush border	cellular_component	5
TRINITY_DN27282_c0_g1	MGI|MGI:107709	100	4.7e-33	17922	Myo7b	GO:0016459	myosin complex	cellular_component	4
TRINITY_DN27282_c0_g1	MGI|MGI:107709	100	4.7e-33	17922	Myo7b	GO:0030154	cell differentiation	biological_process	5
TRINITY_DN27282_c0_g1	MGI|MGI:107709	100	4.7e-33	17922	Myo7b	GO:0042995	cell projection	cellular_component	4
TRINITY_DN27282_c0_g1	MGI|MGI:107709	100	4.7e-33	17922	Myo7b	GO:0090651	apical cytoplasm	cellular_component	6
TRINITY_DN27282_c0_g1	MGI|MGI:107709	100	4.7e-33	17922	Myo7b	GO:1904970	brush border assembly	biological_process	6
TRINITY_DN27324_c0_g2	UNIPROTKB|A9PAB4	90	6.3e-33	18098883	POPTR_0005s04590g	GO:0004784	superoxide dismutase activity	molecular_function	4
TRINITY_DN27324_c0_g2	UNIPROTKB|A9PAB4	90	6.3e-33	18098883	POPTR_0005s04590g	GO:0005507	copper ion binding	molecular_function	8
TRINITY_DN27324_c0_g2	UNIPROTKB|A9PAB4	90	6.3e-33	18098883	POPTR_0005s04590g	GO:0005737	cytoplasm	cellular_component	5
TRINITY_DN27324_c0_g2	UNIPROTKB|A9PAB4	90	6.3e-33	18098883	POPTR_0005s04590g	GO:0008270	zinc ion binding	molecular_function	8
TRINITY_DN27324_c0_g2	UNIPROTKB|A9PAB4	90	6.3e-33	18098883	POPTR_0005s04590g	GO:0019430	removal of superoxide radicals	biological_process	7
TRINITY_DN27428_c0_g1	UNIPROTKB|F5GY11	100	1.9e-44	-	STARD10	GO:0008289	lipid binding	molecular_function	4
TRINITY_DN27446_c0_g2	MGI|MGI:894288	90.3	2.9e-24	20363	Selenop	GO:0001887	selenium compound metabolic process	biological_process	5
TRINITY_DN27446_c0_g2	MGI|MGI:894288	90.3	2.9e-24	20363	Selenop	GO:0005515	protein binding	molecular_function	4
TRINITY_DN27446_c0_g2	MGI|MGI:894288	90.3	2.9e-24	20363	Selenop	GO:0005576	extracellular region	cellular_component	3
TRINITY_DN27446_c0_g2	MGI|MGI:894288	90.3	2.9e-24	20363	Selenop	GO:0005615	extracellular space	cellular_component	4
TRINITY_DN27446_c0_g2	MGI|MGI:894288	90.3	2.9e-24	20363	Selenop	GO:0007420	brain development	biological_process	6
TRINITY_DN27446_c0_g2	MGI|MGI:894288	90.3	2.9e-24	20363	Selenop	GO:0007626	locomotory behavior	biological_process	4
TRINITY_DN27446_c0_g2	MGI|MGI:894288	90.3	2.9e-24	20363	Selenop	GO:0008430	selenium binding	molecular_function	4
TRINITY_DN27446_c0_g2	MGI|MGI:894288	90.3	2.9e-24	20363	Selenop	GO:0009791	post-embryonic development	biological_process	4
TRINITY_DN27446_c0_g2	MGI|MGI:894288	90.3	2.9e-24	20363	Selenop	GO:0019953	sexual reproduction	biological_process	4
TRINITY_DN27446_c0_g2	MGI|MGI:894288	90.3	2.9e-24	20363	Selenop	GO:0040007	growth	biological_process	3
TRINITY_DN27453_c0_g1	UNIPROTKB|A0A087WTS0	100	1.4e-54	-	GPX2	GO:0004602	glutathione peroxidase activity	molecular_function	5
TRINITY_DN27453_c0_g1	UNIPROTKB|A0A087WTS0	100	1.4e-54	-	GPX2	GO:0006979	response to oxidative stress	biological_process	5
TRINITY_DN27453_c0_g1	UNIPROTKB|A0A087WTS0	100	1.4e-54	-	GPX2	GO:0055114	oxidation-reduction process	biological_process	4
TRINITY_DN27453_c0_g1	UNIPROTKB|A0A087WTS0	100	1.4e-54	-	GPX2	GO:0098869	cellular oxidant detoxification	biological_process	5
TRINITY_DN27453_c1_g1	MGI|MGI:97478	100	1.4e-103	18489	Reg3b	GO:0001934	positive regulation of protein phosphorylation	biological_process	10
TRINITY_DN27453_c1_g1	MGI|MGI:97478	100	1.4e-103	18489	Reg3b	GO:0005576	extracellular region	cellular_component	3
TRINITY_DN27453_c1_g1	MGI|MGI:97478	100	1.4e-103	18489	Reg3b	GO:0005615	extracellular space	cellular_component	4
TRINITY_DN27453_c1_g1	MGI|MGI:97478	100	1.4e-103	18489	Reg3b	GO:0005737	cytoplasm	cellular_component	5
TRINITY_DN27453_c1_g1	MGI|MGI:97478	100	1.4e-103	18489	Reg3b	GO:0006952	defense response	biological_process	5
TRINITY_DN27453_c1_g1	MGI|MGI:97478	100	1.4e-103	18489	Reg3b	GO:0006953	acute-phase response	biological_process	8
TRINITY_DN27453_c1_g1	MGI|MGI:97478	100	1.4e-103	18489	Reg3b	GO:0006954	inflammatory response	biological_process	6
TRINITY_DN27453_c1_g1	MGI|MGI:97478	100	1.4e-103	18489	Reg3b	GO:0008284	positive regulation of cell proliferation	biological_process	7
TRINITY_DN27453_c1_g1	MGI|MGI:97478	100	1.4e-103	18489	Reg3b	GO:0019838	growth factor binding	molecular_function	5
TRINITY_DN27453_c1_g1	MGI|MGI:97478	100	1.4e-103	18489	Reg3b	GO:0030246	carbohydrate binding	molecular_function	4
TRINITY_DN27453_c1_g1	MGI|MGI:97478	100	1.4e-103	18489	Reg3b	GO:0042588	zymogen granule	cellular_component	9
TRINITY_DN27453_c1_g1	MGI|MGI:97478	100	1.4e-103	18489	Reg3b	GO:0042802	identical protein binding	molecular_function	5
TRINITY_DN27453_c1_g1	MGI|MGI:97478	100	1.4e-103	18489	Reg3b	GO:0042834	peptidoglycan binding	molecular_function	6
TRINITY_DN27453_c1_g1	MGI|MGI:97478	100	1.4e-103	18489	Reg3b	GO:0043434	response to peptide hormone	biological_process	6
TRINITY_DN27453_c1_g1	MGI|MGI:97478	100	1.4e-103	18489	Reg3b	GO:0043524	negative regulation of neuron apoptotic process	biological_process	10
TRINITY_DN27453_c1_g1	MGI|MGI:97478	100	1.4e-103	18489	Reg3b	GO:0044278	cell wall disruption in other organism	biological_process	6
TRINITY_DN27453_c1_g1	MGI|MGI:97478	100	1.4e-103	18489	Reg3b	GO:0045177	apical part of cell	cellular_component	4
TRINITY_DN27453_c1_g1	MGI|MGI:97478	100	1.4e-103	18489	Reg3b	GO:0050829	defense response to Gram-negative bacterium	biological_process	9
TRINITY_DN27453_c1_g1	MGI|MGI:97478	100	1.4e-103	18489	Reg3b	GO:0050830	defense response to Gram-positive bacterium	biological_process	9
TRINITY_DN27453_c1_g1	MGI|MGI:97478	100	1.4e-103	18489	Reg3b	GO:0051260	protein homooligomerization	biological_process	8
TRINITY_DN27453_c1_g1	MGI|MGI:97478	100	1.4e-103	18489	Reg3b	GO:0060548	negative regulation of cell death	biological_process	7
TRINITY_DN27453_c1_g1	MGI|MGI:97478	100	1.4e-103	18489	Reg3b	GO:0061844	antimicrobial humoral immune response mediated by antimicrobial peptide	biological_process	7
TRINITY_DN27453_c1_g1	MGI|MGI:97478	100	1.4e-103	18489	Reg3b	GO:0070492	oligosaccharide binding	molecular_function	5
TRINITY_DN27453_c1_g1	MGI|MGI:97478	100	1.4e-103	18489	Reg3b	GO:1903208	negative regulation of hydrogen peroxide-induced neuron death	biological_process	10
TRINITY_DN27453_c1_g2	MGI|MGI:109406	100	5.4e-100	19695	Reg3g	GO:0002755	MyD88-dependent toll-like receptor signaling pathway	biological_process	9
TRINITY_DN27453_c1_g2	MGI|MGI:109406	100	5.4e-100	19695	Reg3g	GO:0005576	extracellular region	cellular_component	3
TRINITY_DN27453_c1_g2	MGI|MGI:109406	100	5.4e-100	19695	Reg3g	GO:0005615	extracellular space	cellular_component	4
TRINITY_DN27453_c1_g2	MGI|MGI:109406	100	5.4e-100	19695	Reg3g	GO:0005737	cytoplasm	cellular_component	5
TRINITY_DN27453_c1_g2	MGI|MGI:109406	100	5.4e-100	19695	Reg3g	GO:0006952	defense response	biological_process	5
TRINITY_DN27453_c1_g2	MGI|MGI:109406	100	5.4e-100	19695	Reg3g	GO:0006953	acute-phase response	biological_process	8
TRINITY_DN27453_c1_g2	MGI|MGI:109406	100	5.4e-100	19695	Reg3g	GO:0006954	inflammatory response	biological_process	6
TRINITY_DN27453_c1_g2	MGI|MGI:109406	100	5.4e-100	19695	Reg3g	GO:0008284	positive regulation of cell proliferation	biological_process	7
TRINITY_DN27453_c1_g2	MGI|MGI:109406	100	5.4e-100	19695	Reg3g	GO:0010838	positive regulation of keratinocyte proliferation	biological_process	9
TRINITY_DN27453_c1_g2	MGI|MGI:109406	100	5.4e-100	19695	Reg3g	GO:0030141	secretory granule	cellular_component	8
TRINITY_DN27453_c1_g2	MGI|MGI:109406	100	5.4e-100	19695	Reg3g	GO:0030246	carbohydrate binding	molecular_function	4
TRINITY_DN27453_c1_g2	MGI|MGI:109406	100	5.4e-100	19695	Reg3g	GO:0042834	peptidoglycan binding	molecular_function	6
TRINITY_DN27453_c1_g2	MGI|MGI:109406	100	5.4e-100	19695	Reg3g	GO:0043434	response to peptide hormone	biological_process	6
TRINITY_DN27453_c1_g2	MGI|MGI:109406	100	5.4e-100	19695	Reg3g	GO:0044216	other organism cell	cellular_component	4
TRINITY_DN27453_c1_g2	MGI|MGI:109406	100	5.4e-100	19695	Reg3g	GO:0044278	cell wall disruption in other organism	biological_process	6
TRINITY_DN27453_c1_g2	MGI|MGI:109406	100	5.4e-100	19695	Reg3g	GO:0045617	negative regulation of keratinocyte differentiation	biological_process	10
TRINITY_DN27453_c1_g2	MGI|MGI:109406	100	5.4e-100	19695	Reg3g	GO:0050829	defense response to Gram-negative bacterium	biological_process	9
TRINITY_DN27453_c1_g2	MGI|MGI:109406	100	5.4e-100	19695	Reg3g	GO:0050830	defense response to Gram-positive bacterium	biological_process	9
TRINITY_DN27453_c1_g2	MGI|MGI:109406	100	5.4e-100	19695	Reg3g	GO:0051715	cytolysis in other organism	biological_process	5
TRINITY_DN27453_c1_g2	MGI|MGI:109406	100	5.4e-100	19695	Reg3g	GO:0061844	antimicrobial humoral immune response mediated by antimicrobial peptide	biological_process	7
TRINITY_DN27453_c1_g2	MGI|MGI:109406	100	5.4e-100	19695	Reg3g	GO:0070492	oligosaccharide binding	molecular_function	5
TRINITY_DN27453_c1_g2	MGI|MGI:109406	100	5.4e-100	19695	Reg3g	GO:0090303	positive regulation of wound healing	biological_process	9
TRINITY_DN27490_c0_g1	UNIPROTKB|F1MP54	100	4.8e-33	-	TSPAN3	GO:0005887	integral component of plasma membrane	cellular_component	6
TRINITY_DN27490_c0_g1	UNIPROTKB|F1MP54	100	4.8e-33	-	TSPAN3	GO:0007166	cell surface receptor signaling pathway	biological_process	5
TRINITY_DN27490_c0_g1	UNIPROTKB|F1MP54	100	4.8e-33	-	TSPAN3	GO:0070062	extracellular exosome	cellular_component	7
TRINITY_DN27688_c0_g1	UNIPROTKB|B8YK79	100	2.2e-77	-	LYZ	GO:0001895	retina homeostasis	biological_process	8
TRINITY_DN27688_c0_g1	UNIPROTKB|B8YK79	100	2.2e-77	-	LYZ	GO:0003796	lysozyme activity	molecular_function	7
TRINITY_DN27688_c0_g1	UNIPROTKB|B8YK79	100	2.2e-77	-	LYZ	GO:0005615	extracellular space	cellular_component	4
TRINITY_DN27688_c0_g1	UNIPROTKB|B8YK79	100	2.2e-77	-	LYZ	GO:0042802	identical protein binding	molecular_function	5
TRINITY_DN27688_c0_g1	UNIPROTKB|B8YK79	100	2.2e-77	-	LYZ	GO:0070062	extracellular exosome	cellular_component	7
TRINITY_DN27907_c0_g1	UNIPROTKB|E1BUG7	57.4	3e-10	423083	SPTY2D1	GO:0001042	RNA polymerase I core binding	molecular_function	8
TRINITY_DN27907_c0_g1	UNIPROTKB|E1BUG7	57.4	3e-10	423083	SPTY2D1	GO:0003677	DNA binding	molecular_function	6
TRINITY_DN27907_c0_g1	UNIPROTKB|E1BUG7	57.4	3e-10	423083	SPTY2D1	GO:0005730	nucleolus	cellular_component	6
TRINITY_DN27907_c0_g1	UNIPROTKB|E1BUG7	57.4	3e-10	423083	SPTY2D1	GO:0006334	nucleosome assembly	biological_process	7
TRINITY_DN27907_c0_g1	UNIPROTKB|E1BUG7	57.4	3e-10	423083	SPTY2D1	GO:0006355	regulation of transcription, DNA-templated	biological_process	8
TRINITY_DN27907_c0_g1	UNIPROTKB|E1BUG7	57.4	3e-10	423083	SPTY2D1	GO:0006360	transcription by RNA polymerase I	biological_process	9
TRINITY_DN27907_c0_g1	UNIPROTKB|E1BUG7	57.4	3e-10	423083	SPTY2D1	GO:0010847	regulation of chromatin assembly	biological_process	11
TRINITY_DN27907_c0_g1	UNIPROTKB|E1BUG7	57.4	3e-10	423083	SPTY2D1	GO:0042393	histone binding	molecular_function	5
TRINITY_DN27907_c0_g1	UNIPROTKB|E1BUG7	57.4	3e-10	423083	SPTY2D1	GO:0043486	histone exchange	biological_process	7
TRINITY_DN27938_c0_g1	UNIPROTKB|P53618	100	1.2e-40	1315	COPB1	GO:0000139	Golgi membrane	cellular_component	7
TRINITY_DN27938_c0_g1	UNIPROTKB|P53618	100	1.2e-40	1315	COPB1	GO:0005198	structural molecule activity	molecular_function	3
TRINITY_DN27938_c0_g1	UNIPROTKB|P53618	100	1.2e-40	1315	COPB1	GO:0005515	protein binding	molecular_function	4
TRINITY_DN27938_c0_g1	UNIPROTKB|P53618	100	1.2e-40	1315	COPB1	GO:0005737	cytoplasm	cellular_component	5
TRINITY_DN27938_c0_g1	UNIPROTKB|P53618	100	1.2e-40	1315	COPB1	GO:0005789	endoplasmic reticulum membrane	cellular_component	5
TRINITY_DN27938_c0_g1	UNIPROTKB|P53618	100	1.2e-40	1315	COPB1	GO:0005793	endoplasmic reticulum-Golgi intermediate compartment	cellular_component	6
TRINITY_DN27938_c0_g1	UNIPROTKB|P53618	100	1.2e-40	1315	COPB1	GO:0005794	Golgi apparatus	cellular_component	6
TRINITY_DN27938_c0_g1	UNIPROTKB|P53618	100	1.2e-40	1315	COPB1	GO:0005798	Golgi-associated vesicle	cellular_component	7
TRINITY_DN27938_c0_g1	UNIPROTKB|P53618	100	1.2e-40	1315	COPB1	GO:0005829	cytosol	cellular_component	6
TRINITY_DN27938_c0_g1	UNIPROTKB|P53618	100	1.2e-40	1315	COPB1	GO:0005886	plasma membrane	cellular_component	4
TRINITY_DN27938_c0_g1	UNIPROTKB|P53618	100	1.2e-40	1315	COPB1	GO:0006886	intracellular protein transport	biological_process	10
TRINITY_DN27938_c0_g1	UNIPROTKB|P53618	100	1.2e-40	1315	COPB1	GO:0006888	ER to Golgi vesicle-mediated transport	biological_process	7
TRINITY_DN27938_c0_g1	UNIPROTKB|P53618	100	1.2e-40	1315	COPB1	GO:0006890	retrograde vesicle-mediated transport, Golgi to ER	biological_process	8
TRINITY_DN27938_c0_g1	UNIPROTKB|P53618	100	1.2e-40	1315	COPB1	GO:0006891	intra-Golgi vesicle-mediated transport	biological_process	8
TRINITY_DN27938_c0_g1	UNIPROTKB|P53618	100	1.2e-40	1315	COPB1	GO:0016020	membrane	cellular_component	3
TRINITY_DN27938_c0_g1	UNIPROTKB|P53618	100	1.2e-40	1315	COPB1	GO:0016032	viral process	biological_process	6
TRINITY_DN27938_c0_g1	UNIPROTKB|P53618	100	1.2e-40	1315	COPB1	GO:0030126	COPI vesicle coat	cellular_component	8
TRINITY_DN27938_c0_g1	UNIPROTKB|P53618	100	1.2e-40	1315	COPB1	GO:0030133	transport vesicle	cellular_component	7
TRINITY_DN27938_c0_g1	UNIPROTKB|P53618	100	1.2e-40	1315	COPB1	GO:0030667	secretory granule membrane	cellular_component	7
TRINITY_DN27938_c0_g1	UNIPROTKB|P53618	100	1.2e-40	1315	COPB1	GO:0043231	intracellular membrane-bounded organelle	cellular_component	5
TRINITY_DN27938_c0_g1	UNIPROTKB|P53618	100	1.2e-40	1315	COPB1	GO:0043312	neutrophil degranulation	biological_process	9
TRINITY_DN27938_c0_g1	UNIPROTKB|P53618	100	1.2e-40	1315	COPB1	GO:0070821	tertiary granule membrane	cellular_component	8
TRINITY_DN27938_c0_g1	UNIPROTKB|P53618	100	1.2e-40	1315	COPB1	GO:0101003	ficolin-1-rich granule membrane	cellular_component	8
TRINITY_DN28210_c0_g1	MGI|MGI:1289308	100	2.8e-39	52440	Tax1bp1	GO:0005515	protein binding	molecular_function	4
TRINITY_DN28210_c0_g1	MGI|MGI:1289308	100	2.8e-39	52440	Tax1bp1	GO:0006915	apoptotic process	biological_process	6
TRINITY_DN28210_c0_g1	MGI|MGI:1289308	100	2.8e-39	52440	Tax1bp1	GO:0019900	kinase binding	molecular_function	6
TRINITY_DN28210_c0_g1	MGI|MGI:1289308	100	2.8e-39	52440	Tax1bp1	GO:0032088	negative regulation of NF-kappaB transcription factor activity	biological_process	7
TRINITY_DN28210_c0_g1	MGI|MGI:1289308	100	2.8e-39	52440	Tax1bp1	GO:0043066	negative regulation of apoptotic process	biological_process	9
TRINITY_DN28210_c0_g1	MGI|MGI:1289308	100	2.8e-39	52440	Tax1bp1	GO:0043130	ubiquitin binding	molecular_function	6
TRINITY_DN28210_c0_g1	MGI|MGI:1289308	100	2.8e-39	52440	Tax1bp1	GO:0046872	metal ion binding	molecular_function	6
TRINITY_DN28284_c0_g1	FB|FBgn0033524	33.3	1.2e-07	36105	Cyp49a1	GO:0005506	iron ion binding	molecular_function	8
TRINITY_DN28284_c0_g1	FB|FBgn0033524	33.3	1.2e-07	36105	Cyp49a1	GO:0016705	oxidoreductase activity, acting on paired donors, with incorporation or reduction of molecular oxygen	molecular_function	5
TRINITY_DN28284_c0_g1	FB|FBgn0033524	33.3	1.2e-07	36105	Cyp49a1	GO:0020037	heme binding	molecular_function	6
TRINITY_DN28284_c0_g1	FB|FBgn0033524	33.3	1.2e-07	36105	Cyp49a1	GO:0055114	oxidation-reduction process	biological_process	4
TRINITY_DN28287_c0_g3	TAIR|locus:2182137	91.3	1.6e-15	832034	AILP1	GO:0004066	asparagine synthase (glutamine-hydrolyzing) activity	molecular_function	7
TRINITY_DN28287_c0_g3	TAIR|locus:2182137	91.3	1.6e-15	832034	AILP1	GO:0005737	cytoplasm	cellular_component	5
TRINITY_DN28287_c0_g3	TAIR|locus:2182137	91.3	1.6e-15	832034	AILP1	GO:0005886	plasma membrane	cellular_component	4
TRINITY_DN28287_c0_g3	TAIR|locus:2182137	91.3	1.6e-15	832034	AILP1	GO:0006529	asparagine biosynthetic process	biological_process	12
TRINITY_DN28287_c0_g3	TAIR|locus:2182137	91.3	1.6e-15	832034	AILP1	GO:0009733	response to auxin	biological_process	6
TRINITY_DN28287_c0_g3	TAIR|locus:2182137	91.3	1.6e-15	832034	AILP1	GO:0010044	response to aluminum ion	biological_process	7
TRINITY_DN28287_c0_g3	TAIR|locus:2182137	91.3	1.6e-15	832034	AILP1	GO:0042803	protein homodimerization activity	molecular_function	6
TRINITY_DN28302_c0_g1	UNIPROTKB|B7PUX5	69.5	2.1e-89	8031710	IscW_ISCW019788	GO:0000028	ribosomal small subunit assembly	biological_process	9
TRINITY_DN28302_c0_g1	UNIPROTKB|B7PUX5	69.5	2.1e-89	8031710	IscW_ISCW019788	GO:0003729	mRNA binding	molecular_function	7
TRINITY_DN28302_c0_g1	UNIPROTKB|B7PUX5	69.5	2.1e-89	8031710	IscW_ISCW019788	GO:0003735	structural constituent of ribosome	molecular_function	4
TRINITY_DN28302_c0_g1	UNIPROTKB|B7PUX5	69.5	2.1e-89	8031710	IscW_ISCW019788	GO:0005763	mitochondrial small ribosomal subunit	cellular_component	9
TRINITY_DN28302_c0_g1	UNIPROTKB|B7PUX5	69.5	2.1e-89	8031710	IscW_ISCW019788	GO:0006412	translation	biological_process	8
TRINITY_DN28302_c0_g1	UNIPROTKB|B7PUX5	69.5	2.1e-89	8031710	IscW_ISCW019788	GO:0019843	rRNA binding	molecular_function	7
TRINITY_DN28310_c0_g1	UNIPROTKB|H3BR34	72.5	7e-07	-	MT1B	GO:0046872	metal ion binding	molecular_function	6
TRINITY_DN2833_c0_g2	WB|WBGene00011155	100	7.3e-42	173070	R09B3.2	GO:0000398	mRNA splicing, via spliceosome	biological_process	13
TRINITY_DN2833_c0_g2	WB|WBGene00011155	100	7.3e-42	173070	R09B3.2	GO:0003676	nucleic acid binding	molecular_function	5
TRINITY_DN2833_c0_g2	WB|WBGene00011155	100	7.3e-42	173070	R09B3.2	GO:0003723	RNA binding	molecular_function	6
TRINITY_DN2833_c0_g2	WB|WBGene00011155	100	7.3e-42	173070	R09B3.2	GO:0005689	U12-type spliceosomal complex	cellular_component	7
TRINITY_DN28470_c0_g1	UNIPROTKB|Q3BBW0	100	2.6e-71	-	NBPF9	GO:0005737	cytoplasm	cellular_component	5
TRINITY_DN28642_c0_g1	WB|WBGene00000879	93.6	9.2e-93	180028	cyn-3	GO:0000413	protein peptidyl-prolyl isomerization	biological_process	11
TRINITY_DN28642_c0_g1	WB|WBGene00000879	93.6	9.2e-93	180028	cyn-3	GO:0003755	peptidyl-prolyl cis-trans isomerase activity	molecular_function	6
TRINITY_DN28642_c0_g1	WB|WBGene00000879	93.6	9.2e-93	180028	cyn-3	GO:0005515	protein binding	molecular_function	4
TRINITY_DN28642_c0_g1	WB|WBGene00000879	93.6	9.2e-93	180028	cyn-3	GO:0005623	cell	cellular_component	3
TRINITY_DN28642_c0_g1	WB|WBGene00000879	93.6	9.2e-93	180028	cyn-3	GO:0006457	protein folding	biological_process	4
TRINITY_DN28642_c0_g1	WB|WBGene00000879	93.6	9.2e-93	180028	cyn-3	GO:0016853	isomerase activity	molecular_function	4
TRINITY_DN28656_c0_g1	UNIPROTKB|F1MPP2	100	3.4e-33	-	IGFBP7	GO:0001558	regulation of cell growth	biological_process	6
TRINITY_DN28656_c0_g1	UNIPROTKB|F1MPP2	100	3.4e-33	-	IGFBP7	GO:0005520	insulin-like growth factor binding	molecular_function	6
TRINITY_DN28656_c0_g1	UNIPROTKB|F1MPP2	100	3.4e-33	-	IGFBP7	GO:0005615	extracellular space	cellular_component	4
TRINITY_DN28656_c0_g1	UNIPROTKB|F1MPP2	100	3.4e-33	-	IGFBP7	GO:0007155	cell adhesion	biological_process	4
TRINITY_DN28656_c0_g1	UNIPROTKB|F1MPP2	100	3.4e-33	-	IGFBP7	GO:0031012	extracellular matrix	cellular_component	4
TRINITY_DN28656_c0_g1	UNIPROTKB|F1MPP2	100	3.4e-33	-	IGFBP7	GO:0070062	extracellular exosome	cellular_component	7
TRINITY_DN28686_c0_g1	RGD|68425	100	2.1e-31	65130	Cldn3	GO:0001666	response to hypoxia	biological_process	5
TRINITY_DN28686_c0_g1	RGD|68425	100	2.1e-31	65130	Cldn3	GO:0003382	epithelial cell morphogenesis	biological_process	8
TRINITY_DN28686_c0_g1	RGD|68425	100	2.1e-31	65130	Cldn3	GO:0005198	structural molecule activity	molecular_function	3
TRINITY_DN28686_c0_g1	RGD|68425	100	2.1e-31	65130	Cldn3	GO:0005737	cytoplasm	cellular_component	5
TRINITY_DN28686_c0_g1	RGD|68425	100	2.1e-31	65130	Cldn3	GO:0005923	bicellular tight junction	cellular_component	6
TRINITY_DN28686_c0_g1	RGD|68425	100	2.1e-31	65130	Cldn3	GO:0016021	integral component of membrane	cellular_component	5
TRINITY_DN28686_c0_g1	RGD|68425	100	2.1e-31	65130	Cldn3	GO:0016327	apicolateral plasma membrane	cellular_component	5
TRINITY_DN28686_c0_g1	RGD|68425	100	2.1e-31	65130	Cldn3	GO:0016328	lateral plasma membrane	cellular_component	5
TRINITY_DN28686_c0_g1	RGD|68425	100	2.1e-31	65130	Cldn3	GO:0016338	calcium-independent cell-cell adhesion via plasma membrane cell-adhesion molecules	biological_process	7
TRINITY_DN28686_c0_g1	RGD|68425	100	2.1e-31	65130	Cldn3	GO:0042802	identical protein binding	molecular_function	5
TRINITY_DN28686_c0_g1	RGD|68425	100	2.1e-31	65130	Cldn3	GO:0045471	response to ethanol	biological_process	6
TRINITY_DN28686_c0_g1	RGD|68425	100	2.1e-31	65130	Cldn3	GO:0051260	protein homooligomerization	biological_process	8
TRINITY_DN28686_c0_g1	RGD|68425	100	2.1e-31	65130	Cldn3	GO:0051291	protein heterooligomerization	biological_process	8
TRINITY_DN28686_c0_g1	RGD|68425	100	2.1e-31	65130	Cldn3	GO:0070062	extracellular exosome	cellular_component	7
TRINITY_DN28686_c0_g1	RGD|68425	100	2.1e-31	65130	Cldn3	GO:0070830	bicellular tight junction assembly	biological_process	9
TRINITY_DN2872_c0_g1	UNIPROTKB|F1MR86	100	2.8e-38	509056	FHL1	GO:0003254	regulation of membrane depolarization	biological_process	6
TRINITY_DN2872_c0_g1	UNIPROTKB|F1MR86	100	2.8e-38	509056	FHL1	GO:0005634	nucleus	cellular_component	6
TRINITY_DN2872_c0_g1	UNIPROTKB|F1MR86	100	2.8e-38	509056	FHL1	GO:0005737	cytoplasm	cellular_component	5
TRINITY_DN2872_c0_g1	UNIPROTKB|F1MR86	100	2.8e-38	509056	FHL1	GO:0005886	plasma membrane	cellular_component	4
TRINITY_DN2872_c0_g1	UNIPROTKB|F1MR86	100	2.8e-38	509056	FHL1	GO:0005925	focal adhesion	cellular_component	7
TRINITY_DN2872_c0_g1	UNIPROTKB|F1MR86	100	2.8e-38	509056	FHL1	GO:0008270	zinc ion binding	molecular_function	8
TRINITY_DN2872_c0_g1	UNIPROTKB|F1MR86	100	2.8e-38	509056	FHL1	GO:0010972	negative regulation of G2/M transition of mitotic cell cycle	biological_process	10
TRINITY_DN2872_c0_g1	UNIPROTKB|F1MR86	100	2.8e-38	509056	FHL1	GO:0030308	negative regulation of cell growth	biological_process	7
TRINITY_DN2872_c0_g1	UNIPROTKB|F1MR86	100	2.8e-38	509056	FHL1	GO:0043268	positive regulation of potassium ion transport	biological_process	10
TRINITY_DN2872_c0_g1	UNIPROTKB|F1MR86	100	2.8e-38	509056	FHL1	GO:0044325	ion channel binding	molecular_function	5
TRINITY_DN2872_c0_g1	UNIPROTKB|F1MR86	100	2.8e-38	509056	FHL1	GO:1901016	regulation of potassium ion transmembrane transporter activity	biological_process	8
TRINITY_DN2872_c0_g1	UNIPROTKB|F1MR86	100	2.8e-38	509056	FHL1	GO:2000134	negative regulation of G1/S transition of mitotic cell cycle	biological_process	10
TRINITY_DN28930_c0_g1	UNIPROTKB|Q3T051	100	1.8e-22	101902490	RPL39	GO:0003723	RNA binding	molecular_function	6
TRINITY_DN28930_c0_g1	UNIPROTKB|Q3T051	100	1.8e-22	101902490	RPL39	GO:0003735	structural constituent of ribosome	molecular_function	4
TRINITY_DN28930_c0_g1	UNIPROTKB|Q3T051	100	1.8e-22	101902490	RPL39	GO:0006412	translation	biological_process	8
TRINITY_DN28930_c0_g1	UNIPROTKB|Q3T051	100	1.8e-22	101902490	RPL39	GO:0022625	cytosolic large ribosomal subunit	cellular_component	8
TRINITY_DN28930_c0_g3	UNIPROTKB|Q3T051	100	1.7e-22	101902490	RPL39	GO:0003723	RNA binding	molecular_function	6
TRINITY_DN28930_c0_g3	UNIPROTKB|Q3T051	100	1.7e-22	101902490	RPL39	GO:0003735	structural constituent of ribosome	molecular_function	4
TRINITY_DN28930_c0_g3	UNIPROTKB|Q3T051	100	1.7e-22	101902490	RPL39	GO:0006412	translation	biological_process	8
TRINITY_DN28930_c0_g3	UNIPROTKB|Q3T051	100	1.7e-22	101902490	RPL39	GO:0022625	cytosolic large ribosomal subunit	cellular_component	8
TRINITY_DN29022_c0_g1	UNIPROTKB|B7P5Y3	96.5	1.9e-39	8025110	IscW_ISCW000885	GO:0005737	cytoplasm	cellular_component	5
TRINITY_DN29022_c0_g1	UNIPROTKB|B7P5Y3	96.5	1.9e-39	8025110	IscW_ISCW000885	GO:0005980	glycogen catabolic process	biological_process	10
TRINITY_DN29022_c0_g1	UNIPROTKB|B7P5Y3	96.5	1.9e-39	8025110	IscW_ISCW000885	GO:0008184	glycogen phosphorylase activity	molecular_function	8
TRINITY_DN29022_c0_g1	UNIPROTKB|B7P5Y3	96.5	1.9e-39	8025110	IscW_ISCW000885	GO:0030170	pyridoxal phosphate binding	molecular_function	6
TRINITY_DN29038_c0_g1	UNIPROTKB|Q5ZIH3	76.1	9.7e-23	421480	SLC30A6	GO:0005385	zinc ion transmembrane transporter activity	molecular_function	10
TRINITY_DN29038_c0_g1	UNIPROTKB|Q5ZIH3	76.1	9.7e-23	421480	SLC30A6	GO:0005794	Golgi apparatus	cellular_component	6
TRINITY_DN29038_c0_g1	UNIPROTKB|Q5ZIH3	76.1	9.7e-23	421480	SLC30A6	GO:0010043	response to zinc ion	biological_process	7
TRINITY_DN29038_c0_g1	UNIPROTKB|Q5ZIH3	76.1	9.7e-23	421480	SLC30A6	GO:0016020	membrane	cellular_component	3
TRINITY_DN29038_c0_g1	UNIPROTKB|Q5ZIH3	76.1	9.7e-23	421480	SLC30A6	GO:0016021	integral component of membrane	cellular_component	5
TRINITY_DN29038_c0_g1	UNIPROTKB|Q5ZIH3	76.1	9.7e-23	421480	SLC30A6	GO:0061088	regulation of sequestering of zinc ion	biological_process	6
TRINITY_DN29038_c0_g1	UNIPROTKB|Q5ZIH3	76.1	9.7e-23	421480	SLC30A6	GO:0071577	zinc II ion transmembrane transport	biological_process	11
TRINITY_DN29166_c0_g1	MGI|MGI:107181	100	8e-29	13487	Slc26a3	GO:0005254	chloride channel activity	molecular_function	8
TRINITY_DN29166_c0_g1	MGI|MGI:107181	100	8e-29	13487	Slc26a3	GO:0005515	protein binding	molecular_function	4
TRINITY_DN29166_c0_g1	MGI|MGI:107181	100	8e-29	13487	Slc26a3	GO:0005886	plasma membrane	cellular_component	4
TRINITY_DN29166_c0_g1	MGI|MGI:107181	100	8e-29	13487	Slc26a3	GO:0005887	integral component of plasma membrane	cellular_component	6
TRINITY_DN29166_c0_g1	MGI|MGI:107181	100	8e-29	13487	Slc26a3	GO:0006821	chloride transport	biological_process	9
TRINITY_DN29166_c0_g1	MGI|MGI:107181	100	8e-29	13487	Slc26a3	GO:0008271	secondary active sulfate transmembrane transporter activity	molecular_function	9
TRINITY_DN29166_c0_g1	MGI|MGI:107181	100	8e-29	13487	Slc26a3	GO:0008272	sulfate transport	biological_process	9
TRINITY_DN29166_c0_g1	MGI|MGI:107181	100	8e-29	13487	Slc26a3	GO:0015106	bicarbonate transmembrane transporter activity	molecular_function	8
TRINITY_DN29166_c0_g1	MGI|MGI:107181	100	8e-29	13487	Slc26a3	GO:0015108	chloride transmembrane transporter activity	molecular_function	8
TRINITY_DN29166_c0_g1	MGI|MGI:107181	100	8e-29	13487	Slc26a3	GO:0015116	sulfate transmembrane transporter activity	molecular_function	8
TRINITY_DN29166_c0_g1	MGI|MGI:107181	100	8e-29	13487	Slc26a3	GO:0015297	antiporter activity	molecular_function	7
TRINITY_DN29166_c0_g1	MGI|MGI:107181	100	8e-29	13487	Slc26a3	GO:0015301	anion:anion antiporter activity	molecular_function	8
TRINITY_DN29166_c0_g1	MGI|MGI:107181	100	8e-29	13487	Slc26a3	GO:0015701	bicarbonate transport	biological_process	9
TRINITY_DN29166_c0_g1	MGI|MGI:107181	100	8e-29	13487	Slc26a3	GO:0016020	membrane	cellular_component	3
TRINITY_DN29166_c0_g1	MGI|MGI:107181	100	8e-29	13487	Slc26a3	GO:0016021	integral component of membrane	cellular_component	5
TRINITY_DN29166_c0_g1	MGI|MGI:107181	100	8e-29	13487	Slc26a3	GO:0016324	apical plasma membrane	cellular_component	5
TRINITY_DN29166_c0_g1	MGI|MGI:107181	100	8e-29	13487	Slc26a3	GO:0019531	oxalate transmembrane transporter activity	molecular_function	8
TRINITY_DN29166_c0_g1	MGI|MGI:107181	100	8e-29	13487	Slc26a3	GO:0019532	oxalate transport	biological_process	11
TRINITY_DN29166_c0_g1	MGI|MGI:107181	100	8e-29	13487	Slc26a3	GO:0031526	brush border membrane	cellular_component	6
TRINITY_DN29166_c0_g1	MGI|MGI:107181	100	8e-29	13487	Slc26a3	GO:0042391	regulation of membrane potential	biological_process	5
TRINITY_DN29166_c0_g1	MGI|MGI:107181	100	8e-29	13487	Slc26a3	GO:0048240	sperm capacitation	biological_process	5
TRINITY_DN29166_c0_g1	MGI|MGI:107181	100	8e-29	13487	Slc26a3	GO:0051453	regulation of intracellular pH	biological_process	12
TRINITY_DN29166_c0_g1	MGI|MGI:107181	100	8e-29	13487	Slc26a3	GO:0051454	intracellular pH elevation	biological_process	12
TRINITY_DN29166_c0_g1	MGI|MGI:107181	100	8e-29	13487	Slc26a3	GO:0055085	transmembrane transport	biological_process	6
TRINITY_DN29166_c0_g1	MGI|MGI:107181	100	8e-29	13487	Slc26a3	GO:0060081	membrane hyperpolarization	biological_process	6
TRINITY_DN29166_c0_g1	MGI|MGI:107181	100	8e-29	13487	Slc26a3	GO:0071320	cellular response to cAMP	biological_process	9
TRINITY_DN29166_c0_g1	MGI|MGI:107181	100	8e-29	13487	Slc26a3	GO:0097225	sperm midpiece	cellular_component	5
TRINITY_DN29166_c0_g1	MGI|MGI:107181	100	8e-29	13487	Slc26a3	GO:1902358	sulfate transmembrane transport	biological_process	10
TRINITY_DN29166_c0_g1	MGI|MGI:107181	100	8e-29	13487	Slc26a3	GO:1902476	chloride transmembrane transport	biological_process	10
TRINITY_DN29184_c0_g1	WB|WBGene00004486	100	1.3e-67	172313	rps-17	GO:0000028	ribosomal small subunit assembly	biological_process	9
TRINITY_DN29184_c0_g1	WB|WBGene00004486	100	1.3e-67	172313	rps-17	GO:0003735	structural constituent of ribosome	molecular_function	4
TRINITY_DN29184_c0_g1	WB|WBGene00004486	100	1.3e-67	172313	rps-17	GO:0005622	intracellular	cellular_component	4
TRINITY_DN29184_c0_g1	WB|WBGene00004486	100	1.3e-67	172313	rps-17	GO:0005840	ribosome	cellular_component	6
TRINITY_DN29184_c0_g1	WB|WBGene00004486	100	1.3e-67	172313	rps-17	GO:0006412	translation	biological_process	8
TRINITY_DN29184_c0_g1	WB|WBGene00004486	100	1.3e-67	172313	rps-17	GO:0022627	cytosolic small ribosomal subunit	cellular_component	8
TRINITY_DN29360_c0_g1	UNIPROTKB|D0NHB6	100	1.7e-71	9476086	PITG_10887	GO:0003735	structural constituent of ribosome	molecular_function	4
TRINITY_DN29360_c0_g1	UNIPROTKB|D0NHB6	100	1.7e-71	9476086	PITG_10887	GO:0006412	translation	biological_process	8
TRINITY_DN29360_c0_g1	UNIPROTKB|D0NHB6	100	1.7e-71	9476086	PITG_10887	GO:0022627	cytosolic small ribosomal subunit	cellular_component	8
TRINITY_DN29383_c2_g1	UNIPROTKB|F1Q4C9	100	1.5e-45	-	NDFIP1	GO:0002761	regulation of myeloid leukocyte differentiation	biological_process	8
TRINITY_DN29383_c2_g1	UNIPROTKB|F1Q4C9	100	1.5e-45	-	NDFIP1	GO:0002829	negative regulation of type 2 immune response	biological_process	8
TRINITY_DN29383_c2_g1	UNIPROTKB|F1Q4C9	100	1.5e-45	-	NDFIP1	GO:0005794	Golgi apparatus	cellular_component	6
TRINITY_DN29383_c2_g1	UNIPROTKB|F1Q4C9	100	1.5e-45	-	NDFIP1	GO:0005938	cell cortex	cellular_component	7
TRINITY_DN29383_c2_g1	UNIPROTKB|F1Q4C9	100	1.5e-45	-	NDFIP1	GO:0006879	cellular iron ion homeostasis	biological_process	12
TRINITY_DN29383_c2_g1	UNIPROTKB|F1Q4C9	100	1.5e-45	-	NDFIP1	GO:0007034	vacuolar transport	biological_process	6
TRINITY_DN29383_c2_g1	UNIPROTKB|F1Q4C9	100	1.5e-45	-	NDFIP1	GO:0007165	signal transduction	biological_process	4
TRINITY_DN29383_c2_g1	UNIPROTKB|F1Q4C9	100	1.5e-45	-	NDFIP1	GO:0010629	negative regulation of gene expression	biological_process	8
TRINITY_DN29383_c2_g1	UNIPROTKB|F1Q4C9	100	1.5e-45	-	NDFIP1	GO:0016021	integral component of membrane	cellular_component	5
TRINITY_DN29383_c2_g1	UNIPROTKB|F1Q4C9	100	1.5e-45	-	NDFIP1	GO:0030001	metal ion transport	biological_process	8
TRINITY_DN29383_c2_g1	UNIPROTKB|F1Q4C9	100	1.5e-45	-	NDFIP1	GO:0031398	positive regulation of protein ubiquitination	biological_process	11
TRINITY_DN29383_c2_g1	UNIPROTKB|F1Q4C9	100	1.5e-45	-	NDFIP1	GO:0032410	negative regulation of transporter activity	biological_process	6
TRINITY_DN29383_c2_g1	UNIPROTKB|F1Q4C9	100	1.5e-45	-	NDFIP1	GO:0032713	negative regulation of interleukin-4 production	biological_process	8
TRINITY_DN29383_c2_g1	UNIPROTKB|F1Q4C9	100	1.5e-45	-	NDFIP1	GO:0042130	negative regulation of T cell proliferation	biological_process	11
TRINITY_DN29383_c2_g1	UNIPROTKB|F1Q4C9	100	1.5e-45	-	NDFIP1	GO:0043123	positive regulation of I-kappaB kinase/NF-kappaB signaling	biological_process	10
TRINITY_DN29383_c2_g1	UNIPROTKB|F1Q4C9	100	1.5e-45	-	NDFIP1	GO:0043162	ubiquitin-dependent protein catabolic process via the multivesicular body sorting pathway	biological_process	11
TRINITY_DN29383_c2_g1	UNIPROTKB|F1Q4C9	100	1.5e-45	-	NDFIP1	GO:0045619	regulation of lymphocyte differentiation	biological_process	8
TRINITY_DN29383_c2_g1	UNIPROTKB|F1Q4C9	100	1.5e-45	-	NDFIP1	GO:0045732	positive regulation of protein catabolic process	biological_process	8
TRINITY_DN29383_c2_g1	UNIPROTKB|F1Q4C9	100	1.5e-45	-	NDFIP1	GO:0048294	negative regulation of isotype switching to IgE isotypes	biological_process	11
TRINITY_DN29383_c2_g1	UNIPROTKB|F1Q4C9	100	1.5e-45	-	NDFIP1	GO:0048302	regulation of isotype switching to IgG isotypes	biological_process	11
TRINITY_DN29383_c2_g1	UNIPROTKB|F1Q4C9	100	1.5e-45	-	NDFIP1	GO:0048471	perinuclear region of cytoplasm	cellular_component	6
TRINITY_DN29383_c2_g1	UNIPROTKB|F1Q4C9	100	1.5e-45	-	NDFIP1	GO:0050728	negative regulation of inflammatory response	biological_process	9
TRINITY_DN29383_c2_g1	UNIPROTKB|F1Q4C9	100	1.5e-45	-	NDFIP1	GO:0051224	negative regulation of protein transport	biological_process	7
TRINITY_DN29434_c0_g1	UNIPROTKB|Q9BYE3	100	1.5e-26	84648	LCE3D	GO:0001533	cornified envelope	cellular_component	5
TRINITY_DN29434_c0_g1	UNIPROTKB|Q9BYE3	100	1.5e-26	84648	LCE3D	GO:0005198	structural molecule activity	molecular_function	3
TRINITY_DN29434_c0_g1	UNIPROTKB|Q9BYE3	100	1.5e-26	84648	LCE3D	GO:0005737	cytoplasm	cellular_component	5
TRINITY_DN29434_c0_g1	UNIPROTKB|Q9BYE3	100	1.5e-26	84648	LCE3D	GO:0005829	cytosol	cellular_component	6
TRINITY_DN29434_c0_g1	UNIPROTKB|Q9BYE3	100	1.5e-26	84648	LCE3D	GO:0018149	peptide cross-linking	biological_process	9
TRINITY_DN29434_c0_g1	UNIPROTKB|Q9BYE3	100	1.5e-26	84648	LCE3D	GO:0030216	keratinocyte differentiation	biological_process	8
TRINITY_DN29434_c0_g1	UNIPROTKB|Q9BYE3	100	1.5e-26	84648	LCE3D	GO:0031424	keratinization	biological_process	4
TRINITY_DN29434_c0_g1	UNIPROTKB|Q9BYE3	100	1.5e-26	84648	LCE3D	GO:0070268	cornification	biological_process	6
TRINITY_DN29689_c0_g1	UNIPROTKB|B7PU48	47	1.7e-50	8031394	IscW_ISCW008097	GO:0004364	glutathione transferase activity	molecular_function	6
TRINITY_DN29689_c0_g1	UNIPROTKB|B7PU48	47	1.7e-50	8031394	IscW_ISCW008097	GO:0005737	cytoplasm	cellular_component	5
TRINITY_DN29689_c0_g1	UNIPROTKB|B7PU48	47	1.7e-50	8031394	IscW_ISCW008097	GO:0006749	glutathione metabolic process	biological_process	8
TRINITY_DN29804_c0_g2	MGI|MGI:103226	100	1.8e-30	12867	Cox7c	GO:0004129	cytochrome-c oxidase activity	molecular_function	6
TRINITY_DN29804_c0_g2	MGI|MGI:103226	100	1.8e-30	12867	Cox7c	GO:0005739	mitochondrion	cellular_component	6
TRINITY_DN29804_c0_g2	MGI|MGI:103226	100	1.8e-30	12867	Cox7c	GO:0005743	mitochondrial inner membrane	cellular_component	6
TRINITY_DN29804_c0_g2	MGI|MGI:103226	100	1.8e-30	12867	Cox7c	GO:0005751	mitochondrial respiratory chain complex IV	cellular_component	6
TRINITY_DN29804_c0_g2	MGI|MGI:103226	100	1.8e-30	12867	Cox7c	GO:0006123	mitochondrial electron transport, cytochrome c to oxygen	biological_process	10
TRINITY_DN29804_c0_g2	MGI|MGI:103226	100	1.8e-30	12867	Cox7c	GO:0016020	membrane	cellular_component	3
TRINITY_DN29804_c0_g2	MGI|MGI:103226	100	1.8e-30	12867	Cox7c	GO:0016021	integral component of membrane	cellular_component	5
TRINITY_DN29878_c0_g1	UNIPROTKB|F6H418	89.8	1.3e-45	-	VIT_14s0068g00880	GO:0000028	ribosomal small subunit assembly	biological_process	9
TRINITY_DN29878_c0_g1	UNIPROTKB|F6H418	89.8	1.3e-45	-	VIT_14s0068g00880	GO:0003735	structural constituent of ribosome	molecular_function	4
TRINITY_DN29878_c0_g1	UNIPROTKB|F6H418	89.8	1.3e-45	-	VIT_14s0068g00880	GO:0006412	translation	biological_process	8
TRINITY_DN29878_c0_g1	UNIPROTKB|F6H418	89.8	1.3e-45	-	VIT_14s0068g00880	GO:0022627	cytosolic small ribosomal subunit	cellular_component	8
TRINITY_DN29966_c0_g2	FB|FBgn0051523	42.7	5.1e-18	326148	CG31523	GO:0005575	cellular_component	cellular_component	2
TRINITY_DN29966_c0_g2	FB|FBgn0051523	42.7	5.1e-18	326148	CG31523	GO:0009922	fatty acid elongase activity	molecular_function	8
TRINITY_DN29966_c0_g2	FB|FBgn0051523	42.7	5.1e-18	326148	CG31523	GO:0016021	integral component of membrane	cellular_component	5
TRINITY_DN29966_c0_g2	FB|FBgn0051523	42.7	5.1e-18	326148	CG31523	GO:0030497	fatty acid elongation	biological_process	11
TRINITY_DN30008_c0_g2	TAIR|locus:2130429	64.2	1.1e-10	827147	AT4G14900	GO:0005515	protein binding	molecular_function	4
TRINITY_DN30008_c0_g2	TAIR|locus:2130429	64.2	1.1e-10	827147	AT4G14900	GO:0005634	nucleus	cellular_component	6
TRINITY_DN30008_c0_g2	TAIR|locus:2130429	64.2	1.1e-10	827147	AT4G14900	GO:0009908	flower development	biological_process	6
TRINITY_DN30008_c0_g2	TAIR|locus:2130429	64.2	1.1e-10	827147	AT4G14900	GO:0030154	cell differentiation	biological_process	5
TRINITY_DN30017_c0_g1	UNIPROTKB|B7PA91	91.1	5.9e-99	8026910	IscW_ISCW017132	GO:0005634	nucleus	cellular_component	6
TRINITY_DN30017_c0_g1	UNIPROTKB|B7PA91	91.1	5.9e-99	8026910	IscW_ISCW017132	GO:0005737	cytoplasm	cellular_component	5
TRINITY_DN30017_c0_g1	UNIPROTKB|B7PA91	91.1	5.9e-99	8026910	IscW_ISCW017132	GO:0006301	postreplication repair	biological_process	9
TRINITY_DN30017_c0_g1	UNIPROTKB|B7PA91	91.1	5.9e-99	8026910	IscW_ISCW017132	GO:0031625	ubiquitin protein ligase binding	molecular_function	7
TRINITY_DN30017_c0_g1	UNIPROTKB|B7PA91	91.1	5.9e-99	8026910	IscW_ISCW017132	GO:0061630	ubiquitin protein ligase activity	molecular_function	7
TRINITY_DN30017_c0_g1	UNIPROTKB|B7PA91	91.1	5.9e-99	8026910	IscW_ISCW017132	GO:0070534	protein K63-linked ubiquitination	biological_process	13
TRINITY_DN30169_c0_g2	FB|FBgn0038079	51.7	2.2e-09	41568	NijC	GO:0007155	cell adhesion	biological_process	4
TRINITY_DN30169_c0_g2	FB|FBgn0038079	51.7	2.2e-09	41568	NijC	GO:0016021	integral component of membrane	cellular_component	5
TRINITY_DN30169_c0_g2	FB|FBgn0038079	51.7	2.2e-09	41568	NijC	GO:0042246	tissue regeneration	biological_process	6
TRINITY_DN30219_c0_g1	UNIPROTKB|A0A024R5S0	100	3.9e-47	-	hCG_2003792	GO:0005515	protein binding	molecular_function	4
TRINITY_DN30223_c0_g1	UNIPROTKB|Q3MI00	100	2.1e-17	538426	DNAJB1	GO:0001671	ATPase activator activity	molecular_function	6
TRINITY_DN30223_c0_g1	UNIPROTKB|Q3MI00	100	2.1e-17	538426	DNAJB1	GO:0005730	nucleolus	cellular_component	6
TRINITY_DN30223_c0_g1	UNIPROTKB|Q3MI00	100	2.1e-17	538426	DNAJB1	GO:0005829	cytosol	cellular_component	6
TRINITY_DN30223_c0_g1	UNIPROTKB|Q3MI00	100	2.1e-17	538426	DNAJB1	GO:0030544	Hsp70 protein binding	molecular_function	6
TRINITY_DN30223_c0_g1	UNIPROTKB|Q3MI00	100	2.1e-17	538426	DNAJB1	GO:0032781	positive regulation of ATPase activity	biological_process	8
TRINITY_DN30223_c0_g1	UNIPROTKB|Q3MI00	100	2.1e-17	538426	DNAJB1	GO:0051082	unfolded protein binding	molecular_function	5
TRINITY_DN30223_c0_g1	UNIPROTKB|Q3MI00	100	2.1e-17	538426	DNAJB1	GO:0051085	chaperone cofactor-dependent protein refolding	biological_process	7
TRINITY_DN30223_c0_g1	UNIPROTKB|Q3MI00	100	2.1e-17	538426	DNAJB1	GO:0051087	chaperone binding	molecular_function	5
TRINITY_DN30223_c0_g1	UNIPROTKB|Q3MI00	100	2.1e-17	538426	DNAJB1	GO:0051117	ATPase binding	molecular_function	6
TRINITY_DN30223_c0_g1	UNIPROTKB|Q3MI00	100	2.1e-17	538426	DNAJB1	GO:0070062	extracellular exosome	cellular_component	7
TRINITY_DN30223_c0_g1	UNIPROTKB|Q3MI00	100	2.1e-17	538426	DNAJB1	GO:0090084	negative regulation of inclusion body assembly	biological_process	8
TRINITY_DN30240_c0_g1	UNIPROTKB|F1P982	35.4	3.6e-10	-	RBM12	GO:0000166	nucleotide binding	molecular_function	5
TRINITY_DN30240_c0_g1	UNIPROTKB|F1P982	35.4	3.6e-10	-	RBM12	GO:0003676	nucleic acid binding	molecular_function	5
TRINITY_DN30325_c0_g1	UNIPROTKB|M3WDU7	98.7	3.6e-79	-	RPS16	GO:0000462	maturation of SSU-rRNA from tricistronic rRNA transcript (SSU-rRNA, 5.8S rRNA, LSU-rRNA)	biological_process	13
TRINITY_DN30325_c0_g1	UNIPROTKB|M3WDU7	98.7	3.6e-79	-	RPS16	GO:0003735	structural constituent of ribosome	molecular_function	4
TRINITY_DN30325_c0_g1	UNIPROTKB|M3WDU7	98.7	3.6e-79	-	RPS16	GO:0006412	translation	biological_process	8
TRINITY_DN30325_c0_g1	UNIPROTKB|M3WDU7	98.7	3.6e-79	-	RPS16	GO:0022627	cytosolic small ribosomal subunit	cellular_component	8
TRINITY_DN30376_c0_g2	TAIR|locus:2082822	100	3.4e-41	825316	PIP1A	GO:0005739	mitochondrion	cellular_component	6
TRINITY_DN30376_c0_g2	TAIR|locus:2082822	100	3.4e-41	825316	PIP1A	GO:0005773	vacuole	cellular_component	6
TRINITY_DN30376_c0_g2	TAIR|locus:2082822	100	3.4e-41	825316	PIP1A	GO:0005886	plasma membrane	cellular_component	4
TRINITY_DN30376_c0_g2	TAIR|locus:2082822	100	3.4e-41	825316	PIP1A	GO:0005887	integral component of plasma membrane	cellular_component	6
TRINITY_DN30376_c0_g2	TAIR|locus:2082822	100	3.4e-41	825316	PIP1A	GO:0006810	transport	biological_process	5
TRINITY_DN30376_c0_g2	TAIR|locus:2082822	100	3.4e-41	825316	PIP1A	GO:0006833	water transport	biological_process	7
TRINITY_DN30376_c0_g2	TAIR|locus:2082822	100	3.4e-41	825316	PIP1A	GO:0009414	response to water deprivation	biological_process	5
TRINITY_DN30376_c0_g2	TAIR|locus:2082822	100	3.4e-41	825316	PIP1A	GO:0009506	plasmodesma	cellular_component	5
TRINITY_DN30376_c0_g2	TAIR|locus:2082822	100	3.4e-41	825316	PIP1A	GO:0009941	chloroplast envelope	cellular_component	7
TRINITY_DN30376_c0_g2	TAIR|locus:2082822	100	3.4e-41	825316	PIP1A	GO:0015250	water channel activity	molecular_function	7
TRINITY_DN30376_c0_g2	TAIR|locus:2082822	100	3.4e-41	825316	PIP1A	GO:0016020	membrane	cellular_component	3
TRINITY_DN30376_c0_g2	TAIR|locus:2082822	100	3.4e-41	825316	PIP1A	GO:0034220	ion transmembrane transport	biological_process	7
TRINITY_DN30376_c0_g2	TAIR|locus:2082822	100	3.4e-41	825316	PIP1A	GO:0055085	transmembrane transport	biological_process	6
TRINITY_DN30613_c0_g1	TAIR|locus:2161790	91.5	3e-30	835699	HSP81-3	GO:0005515	protein binding	molecular_function	4
TRINITY_DN30613_c0_g1	TAIR|locus:2161790	91.5	3e-30	835699	HSP81-3	GO:0005524	ATP binding	molecular_function	5
TRINITY_DN30613_c0_g1	TAIR|locus:2161790	91.5	3e-30	835699	HSP81-3	GO:0005730	nucleolus	cellular_component	6
TRINITY_DN30613_c0_g1	TAIR|locus:2161790	91.5	3e-30	835699	HSP81-3	GO:0005737	cytoplasm	cellular_component	5
TRINITY_DN30613_c0_g1	TAIR|locus:2161790	91.5	3e-30	835699	HSP81-3	GO:0005794	Golgi apparatus	cellular_component	6
TRINITY_DN30613_c0_g1	TAIR|locus:2161790	91.5	3e-30	835699	HSP81-3	GO:0005829	cytosol	cellular_component	6
TRINITY_DN30613_c0_g1	TAIR|locus:2161790	91.5	3e-30	835699	HSP81-3	GO:0005886	plasma membrane	cellular_component	4
TRINITY_DN30613_c0_g1	TAIR|locus:2161790	91.5	3e-30	835699	HSP81-3	GO:0006457	protein folding	biological_process	4
TRINITY_DN30613_c0_g1	TAIR|locus:2161790	91.5	3e-30	835699	HSP81-3	GO:0009408	response to heat	biological_process	5
TRINITY_DN30613_c0_g1	TAIR|locus:2161790	91.5	3e-30	835699	HSP81-3	GO:0016020	membrane	cellular_component	3
TRINITY_DN30613_c0_g1	TAIR|locus:2161790	91.5	3e-30	835699	HSP81-3	GO:0045087	innate immune response	biological_process	5
TRINITY_DN30613_c0_g1	TAIR|locus:2161790	91.5	3e-30	835699	HSP81-3	GO:0051082	unfolded protein binding	molecular_function	5
TRINITY_DN30613_c0_g1	TAIR|locus:2161790	91.5	3e-30	835699	HSP81-3	GO:0051131	chaperone-mediated protein complex assembly	biological_process	8
TRINITY_DN30613_c0_g1	TAIR|locus:2161790	91.5	3e-30	835699	HSP81-3	GO:0071277	cellular response to calcium ion	biological_process	8
TRINITY_DN30614_c0_g1	UNIPROTKB|Q8IWD5	22	7.8e-10	162387	MFSD6L	GO:0016021	integral component of membrane	cellular_component	5
TRINITY_DN30682_c1_g1	ZFIN|ZDB-GENE-050522-453	39.5	7.4e-44	554145	elovl8b	GO:0006629	lipid metabolic process	biological_process	5
TRINITY_DN30682_c1_g1	ZFIN|ZDB-GENE-050522-453	39.5	7.4e-44	554145	elovl8b	GO:0006631	fatty acid metabolic process	biological_process	9
TRINITY_DN30682_c1_g1	ZFIN|ZDB-GENE-050522-453	39.5	7.4e-44	554145	elovl8b	GO:0006633	fatty acid biosynthetic process	biological_process	10
TRINITY_DN30682_c1_g1	ZFIN|ZDB-GENE-050522-453	39.5	7.4e-44	554145	elovl8b	GO:0009922	fatty acid elongase activity	molecular_function	8
TRINITY_DN30682_c1_g1	ZFIN|ZDB-GENE-050522-453	39.5	7.4e-44	554145	elovl8b	GO:0016020	membrane	cellular_component	3
TRINITY_DN30682_c1_g1	ZFIN|ZDB-GENE-050522-453	39.5	7.4e-44	554145	elovl8b	GO:0016021	integral component of membrane	cellular_component	5
TRINITY_DN30682_c1_g1	ZFIN|ZDB-GENE-050522-453	39.5	7.4e-44	554145	elovl8b	GO:0016740	transferase activity	molecular_function	4
TRINITY_DN30682_c1_g1	ZFIN|ZDB-GENE-050522-453	39.5	7.4e-44	554145	elovl8b	GO:0019367	fatty acid elongation, saturated fatty acid	biological_process	12
TRINITY_DN30682_c1_g1	ZFIN|ZDB-GENE-050522-453	39.5	7.4e-44	554145	elovl8b	GO:0030148	sphingolipid biosynthetic process	biological_process	9
TRINITY_DN30682_c1_g1	ZFIN|ZDB-GENE-050522-453	39.5	7.4e-44	554145	elovl8b	GO:0030176	integral component of endoplasmic reticulum membrane	cellular_component	7
TRINITY_DN30682_c1_g1	ZFIN|ZDB-GENE-050522-453	39.5	7.4e-44	554145	elovl8b	GO:0034625	fatty acid elongation, monounsaturated fatty acid	biological_process	13
TRINITY_DN30682_c1_g1	ZFIN|ZDB-GENE-050522-453	39.5	7.4e-44	554145	elovl8b	GO:0034626	fatty acid elongation, polyunsaturated fatty acid	biological_process	13
TRINITY_DN30682_c1_g1	ZFIN|ZDB-GENE-050522-453	39.5	7.4e-44	554145	elovl8b	GO:0042761	very long-chain fatty acid biosynthetic process	biological_process	11
TRINITY_DN30682_c1_g1	ZFIN|ZDB-GENE-050522-453	39.5	7.4e-44	554145	elovl8b	GO:0102336	3-oxo-arachidoyl-CoA synthase activity	molecular_function	7
TRINITY_DN30682_c1_g1	ZFIN|ZDB-GENE-050522-453	39.5	7.4e-44	554145	elovl8b	GO:0102337	3-oxo-cerotoyl-CoA synthase activity	molecular_function	7
TRINITY_DN30682_c1_g1	ZFIN|ZDB-GENE-050522-453	39.5	7.4e-44	554145	elovl8b	GO:0102338	3-oxo-lignoceronyl-CoA synthase activity	molecular_function	7
TRINITY_DN30709_c0_g1	UNIPROTKB|F1SH48	46.6	8.1e-27	-	ARL14	GO:0005525	GTP binding	molecular_function	8
TRINITY_DN30709_c0_g1	UNIPROTKB|F1SH48	46.6	8.1e-27	-	ARL14	GO:0005622	intracellular	cellular_component	4
TRINITY_DN30709_c0_g1	UNIPROTKB|F1SH48	46.6	8.1e-27	-	ARL14	GO:0007264	small GTPase mediated signal transduction	biological_process	6
TRINITY_DN30714_c0_g2	UNIPROTKB|P68530	90.4	1.3e-42	3283880	MT-CO2	GO:0004129	cytochrome-c oxidase activity	molecular_function	6
TRINITY_DN30714_c0_g2	UNIPROTKB|P68530	90.4	1.3e-42	3283880	MT-CO2	GO:0005507	copper ion binding	molecular_function	8
TRINITY_DN30714_c0_g2	UNIPROTKB|P68530	90.4	1.3e-42	3283880	MT-CO2	GO:0005743	mitochondrial inner membrane	cellular_component	6
TRINITY_DN30714_c0_g2	UNIPROTKB|P68530	90.4	1.3e-42	3283880	MT-CO2	GO:0016021	integral component of membrane	cellular_component	5
TRINITY_DN30714_c0_g2	UNIPROTKB|P68530	90.4	1.3e-42	3283880	MT-CO2	GO:0022900	electron transport chain	biological_process	6
TRINITY_DN30714_c0_g2	UNIPROTKB|P68530	90.4	1.3e-42	3283880	MT-CO2	GO:0045277	respiratory chain complex IV	cellular_component	5
TRINITY_DN30714_c0_g2	UNIPROTKB|P68530	90.4	1.3e-42	3283880	MT-CO2	GO:0070062	extracellular exosome	cellular_component	7
TRINITY_DN30714_c0_g2	UNIPROTKB|P68530	90.4	1.3e-42	3283880	MT-CO2	GO:1902600	proton transmembrane transport	biological_process	9
TRINITY_DN30714_c1_g1	RGD|621872	92.3	5.9e-103	26198	Mt-co2	GO:0003674	molecular_function	molecular_function	2
TRINITY_DN30714_c1_g1	RGD|621872	92.3	5.9e-103	26198	Mt-co2	GO:0004129	cytochrome-c oxidase activity	molecular_function	6
TRINITY_DN30714_c1_g1	RGD|621872	92.3	5.9e-103	26198	Mt-co2	GO:0005507	copper ion binding	molecular_function	8
TRINITY_DN30714_c1_g1	RGD|621872	92.3	5.9e-103	26198	Mt-co2	GO:0005575	cellular_component	cellular_component	2
TRINITY_DN30714_c1_g1	RGD|621872	92.3	5.9e-103	26198	Mt-co2	GO:0005739	mitochondrion	cellular_component	6
TRINITY_DN30714_c1_g1	RGD|621872	92.3	5.9e-103	26198	Mt-co2	GO:0005743	mitochondrial inner membrane	cellular_component	6
TRINITY_DN30714_c1_g1	RGD|621872	92.3	5.9e-103	26198	Mt-co2	GO:0005751	mitochondrial respiratory chain complex IV	cellular_component	6
TRINITY_DN30714_c1_g1	RGD|621872	92.3	5.9e-103	26198	Mt-co2	GO:0007595	lactation	biological_process	8
TRINITY_DN30714_c1_g1	RGD|621872	92.3	5.9e-103	26198	Mt-co2	GO:0009409	response to cold	biological_process	5
TRINITY_DN30714_c1_g1	RGD|621872	92.3	5.9e-103	26198	Mt-co2	GO:0016020	membrane	cellular_component	3
TRINITY_DN30714_c1_g1	RGD|621872	92.3	5.9e-103	26198	Mt-co2	GO:0016021	integral component of membrane	cellular_component	5
TRINITY_DN30714_c1_g1	RGD|621872	92.3	5.9e-103	26198	Mt-co2	GO:0042773	ATP synthesis coupled electron transport	biological_process	8
TRINITY_DN30714_c1_g1	RGD|621872	92.3	5.9e-103	26198	Mt-co2	GO:0045277	respiratory chain complex IV	cellular_component	5
TRINITY_DN30714_c1_g1	RGD|621872	92.3	5.9e-103	26198	Mt-co2	GO:0070062	extracellular exosome	cellular_component	7
TRINITY_DN30714_c1_g1	RGD|621872	92.3	5.9e-103	26198	Mt-co2	GO:1902600	proton transmembrane transport	biological_process	9
TRINITY_DN30714_c1_g3	MGI|MGI:102503	92.4	1.2e-103	17709	mt-Co2	GO:0004129	cytochrome-c oxidase activity	molecular_function	6
TRINITY_DN30714_c1_g3	MGI|MGI:102503	92.4	1.2e-103	17709	mt-Co2	GO:0005507	copper ion binding	molecular_function	8
TRINITY_DN30714_c1_g3	MGI|MGI:102503	92.4	1.2e-103	17709	mt-Co2	GO:0005739	mitochondrion	cellular_component	6
TRINITY_DN30714_c1_g3	MGI|MGI:102503	92.4	1.2e-103	17709	mt-Co2	GO:0005743	mitochondrial inner membrane	cellular_component	6
TRINITY_DN30714_c1_g3	MGI|MGI:102503	92.4	1.2e-103	17709	mt-Co2	GO:0005751	mitochondrial respiratory chain complex IV	cellular_component	6
TRINITY_DN30714_c1_g3	MGI|MGI:102503	92.4	1.2e-103	17709	mt-Co2	GO:0016020	membrane	cellular_component	3
TRINITY_DN30714_c1_g3	MGI|MGI:102503	92.4	1.2e-103	17709	mt-Co2	GO:0016021	integral component of membrane	cellular_component	5
TRINITY_DN30714_c1_g3	MGI|MGI:102503	92.4	1.2e-103	17709	mt-Co2	GO:0016491	oxidoreductase activity	molecular_function	4
TRINITY_DN30714_c1_g3	MGI|MGI:102503	92.4	1.2e-103	17709	mt-Co2	GO:0022900	electron transport chain	biological_process	6
TRINITY_DN30714_c1_g3	MGI|MGI:102503	92.4	1.2e-103	17709	mt-Co2	GO:0042773	ATP synthesis coupled electron transport	biological_process	8
TRINITY_DN30714_c1_g3	MGI|MGI:102503	92.4	1.2e-103	17709	mt-Co2	GO:0045277	respiratory chain complex IV	cellular_component	5
TRINITY_DN30714_c1_g3	MGI|MGI:102503	92.4	1.2e-103	17709	mt-Co2	GO:0046872	metal ion binding	molecular_function	6
TRINITY_DN30714_c1_g3	MGI|MGI:102503	92.4	1.2e-103	17709	mt-Co2	GO:0055114	oxidation-reduction process	biological_process	4
TRINITY_DN30714_c1_g3	MGI|MGI:102503	92.4	1.2e-103	17709	mt-Co2	GO:0070469	respiratory chain	cellular_component	4
TRINITY_DN30730_c2_g1	UNIPROTKB|P05387	100	3.5e-30	6181	RPLP2	GO:0000184	nuclear-transcribed mRNA catabolic process, nonsense-mediated decay	biological_process	12
TRINITY_DN30730_c2_g1	UNIPROTKB|P05387	100	3.5e-30	6181	RPLP2	GO:0002181	cytoplasmic translation	biological_process	9
TRINITY_DN30730_c2_g1	UNIPROTKB|P05387	100	3.5e-30	6181	RPLP2	GO:0003735	structural constituent of ribosome	molecular_function	4
TRINITY_DN30730_c2_g1	UNIPROTKB|P05387	100	3.5e-30	6181	RPLP2	GO:0005515	protein binding	molecular_function	4
TRINITY_DN30730_c2_g1	UNIPROTKB|P05387	100	3.5e-30	6181	RPLP2	GO:0005829	cytosol	cellular_component	6
TRINITY_DN30730_c2_g1	UNIPROTKB|P05387	100	3.5e-30	6181	RPLP2	GO:0005925	focal adhesion	cellular_component	7
TRINITY_DN30730_c2_g1	UNIPROTKB|P05387	100	3.5e-30	6181	RPLP2	GO:0006364	rRNA processing	biological_process	11
TRINITY_DN30730_c2_g1	UNIPROTKB|P05387	100	3.5e-30	6181	RPLP2	GO:0006412	translation	biological_process	8
TRINITY_DN30730_c2_g1	UNIPROTKB|P05387	100	3.5e-30	6181	RPLP2	GO:0006413	translational initiation	biological_process	5
TRINITY_DN30730_c2_g1	UNIPROTKB|P05387	100	3.5e-30	6181	RPLP2	GO:0006414	translational elongation	biological_process	8
TRINITY_DN30730_c2_g1	UNIPROTKB|P05387	100	3.5e-30	6181	RPLP2	GO:0006614	SRP-dependent cotranslational protein targeting to membrane	biological_process	14
TRINITY_DN30730_c2_g1	UNIPROTKB|P05387	100	3.5e-30	6181	RPLP2	GO:0016020	membrane	cellular_component	3
TRINITY_DN30730_c2_g1	UNIPROTKB|P05387	100	3.5e-30	6181	RPLP2	GO:0019083	viral transcription	biological_process	7
TRINITY_DN30730_c2_g1	UNIPROTKB|P05387	100	3.5e-30	6181	RPLP2	GO:0022625	cytosolic large ribosomal subunit	cellular_component	8
TRINITY_DN30730_c2_g1	UNIPROTKB|P05387	100	3.5e-30	6181	RPLP2	GO:0030687	preribosome, large subunit precursor	cellular_component	6
TRINITY_DN30730_c2_g1	UNIPROTKB|P05387	100	3.5e-30	6181	RPLP2	GO:0070062	extracellular exosome	cellular_component	7
TRINITY_DN30730_c2_g1	UNIPROTKB|P05387	100	3.5e-30	6181	RPLP2	GO:0070180	large ribosomal subunit rRNA binding	molecular_function	8
TRINITY_DN30813_c0_g1	UNIPROTKB|B7QMP6	57	8.8e-29	8043563	IscW_ISCW015277	GO:0000462	maturation of SSU-rRNA from tricistronic rRNA transcript (SSU-rRNA, 5.8S rRNA, LSU-rRNA)	biological_process	13
TRINITY_DN30813_c0_g1	UNIPROTKB|B7QMP6	57	8.8e-29	8043563	IscW_ISCW015277	GO:0005730	nucleolus	cellular_component	6
TRINITY_DN30813_c0_g1	UNIPROTKB|B7QMP6	57	8.8e-29	8043563	IscW_ISCW015277	GO:0030686	90S preribosome	cellular_component	6
TRINITY_DN30813_c0_g1	UNIPROTKB|B7QMP6	57	8.8e-29	8043563	IscW_ISCW015277	GO:0032040	small-subunit processome	cellular_component	6
TRINITY_DN30888_c0_g1	UNIPROTKB|F6QYX0	56.8	3.1e-09	-	CBS	GO:0004124	cysteine synthase activity	molecular_function	6
TRINITY_DN30888_c0_g1	UNIPROTKB|F6QYX0	56.8	3.1e-09	-	CBS	GO:0005737	cytoplasm	cellular_component	5
TRINITY_DN30888_c0_g1	UNIPROTKB|F6QYX0	56.8	3.1e-09	-	CBS	GO:0006535	cysteine biosynthetic process from serine	biological_process	12
TRINITY_DN30888_c0_g1	UNIPROTKB|F6QYX0	56.8	3.1e-09	-	CBS	GO:0020037	heme binding	molecular_function	6
TRINITY_DN30888_c0_g1	UNIPROTKB|F6QYX0	56.8	3.1e-09	-	CBS	GO:0030170	pyridoxal phosphate binding	molecular_function	6
TRINITY_DN30900_c0_g1	UNIPROTKB|F6XWC0	93.4	4.5e-29	-	RPS29	GO:0003735	structural constituent of ribosome	molecular_function	4
TRINITY_DN30900_c0_g1	UNIPROTKB|F6XWC0	93.4	4.5e-29	-	RPS29	GO:0008270	zinc ion binding	molecular_function	8
TRINITY_DN30900_c0_g1	UNIPROTKB|F6XWC0	93.4	4.5e-29	-	RPS29	GO:0022627	cytosolic small ribosomal subunit	cellular_component	8
TRINITY_DN30900_c0_g2	UNIPROTKB|E1C3G8	100	1.2e-28	776054	RPS29	GO:0003735	structural constituent of ribosome	molecular_function	4
TRINITY_DN30900_c0_g2	UNIPROTKB|E1C3G8	100	1.2e-28	776054	RPS29	GO:0005925	focal adhesion	cellular_component	7
TRINITY_DN30900_c0_g2	UNIPROTKB|E1C3G8	100	1.2e-28	776054	RPS29	GO:0006412	translation	biological_process	8
TRINITY_DN30900_c0_g2	UNIPROTKB|E1C3G8	100	1.2e-28	776054	RPS29	GO:0008270	zinc ion binding	molecular_function	8
TRINITY_DN30900_c0_g2	UNIPROTKB|E1C3G8	100	1.2e-28	776054	RPS29	GO:0022627	cytosolic small ribosomal subunit	cellular_component	8
TRINITY_DN30900_c0_g2	UNIPROTKB|E1C3G8	100	1.2e-28	776054	RPS29	GO:0070062	extracellular exosome	cellular_component	7
TRINITY_DN30948_c0_g1	TAIR|locus:2037768	93.8	6.6e-24	838094	AT1G15270	GO:0003674	molecular_function	molecular_function	2
TRINITY_DN30948_c0_g1	TAIR|locus:2037768	93.8	6.6e-24	838094	AT1G15270	GO:0005886	plasma membrane	cellular_component	4
TRINITY_DN30948_c0_g1	TAIR|locus:2037768	93.8	6.6e-24	838094	AT1G15270	GO:0008150	biological_process	biological_process	2
TRINITY_DN30957_c0_g1	UNIPROTKB|F1NIC5	51.4	6.5e-17	422190	TIMM8A	GO:0005758	mitochondrial intermembrane space	cellular_component	6
TRINITY_DN30957_c0_g1	UNIPROTKB|F1NIC5	51.4	6.5e-17	422190	TIMM8A	GO:0015031	protein transport	biological_process	9
TRINITY_DN30957_c0_g1	UNIPROTKB|F1NIC5	51.4	6.5e-17	422190	TIMM8A	GO:0046872	metal ion binding	molecular_function	6
TRINITY_DN30992_c0_g1	UNIPROTKB|B7P5E5	61.3	3.6e-34	8024867	IscW_ISCW016454	GO:0042254	ribosome biogenesis	biological_process	6
TRINITY_DN31096_c0_g2	TAIR|locus:2207320	82.3	1.5e-51	844245	PSBR	GO:0005515	protein binding	molecular_function	4
TRINITY_DN31096_c0_g2	TAIR|locus:2207320	82.3	1.5e-51	844245	PSBR	GO:0009507	chloroplast	cellular_component	7
TRINITY_DN31096_c0_g2	TAIR|locus:2207320	82.3	1.5e-51	844245	PSBR	GO:0009523	photosystem II	cellular_component	7
TRINITY_DN31096_c0_g2	TAIR|locus:2207320	82.3	1.5e-51	844245	PSBR	GO:0009534	chloroplast thylakoid	cellular_component	7
TRINITY_DN31096_c0_g2	TAIR|locus:2207320	82.3	1.5e-51	844245	PSBR	GO:0009535	chloroplast thylakoid membrane	cellular_component	8
TRINITY_DN31096_c0_g2	TAIR|locus:2207320	82.3	1.5e-51	844245	PSBR	GO:0009579	thylakoid	cellular_component	5
TRINITY_DN31096_c0_g2	TAIR|locus:2207320	82.3	1.5e-51	844245	PSBR	GO:0009654	photosystem II oxygen evolving complex	cellular_component	6
TRINITY_DN31096_c0_g2	TAIR|locus:2207320	82.3	1.5e-51	844245	PSBR	GO:0009735	response to cytokinin	biological_process	6
TRINITY_DN31096_c0_g2	TAIR|locus:2207320	82.3	1.5e-51	844245	PSBR	GO:0010270	photosystem II oxygen evolving complex assembly	biological_process	9
TRINITY_DN31096_c0_g2	TAIR|locus:2207320	82.3	1.5e-51	844245	PSBR	GO:0015979	photosynthesis	biological_process	5
TRINITY_DN31101_c0_g1	MGI|MGI:1351597	100	7.9e-53	27425	Atp5l	GO:0000276	mitochondrial proton-transporting ATP synthase complex, coupling factor F(o)	cellular_component	7
TRINITY_DN31101_c0_g1	MGI|MGI:1351597	100	7.9e-53	27425	Atp5l	GO:0005739	mitochondrion	cellular_component	6
TRINITY_DN31101_c0_g1	MGI|MGI:1351597	100	7.9e-53	27425	Atp5l	GO:0005743	mitochondrial inner membrane	cellular_component	6
TRINITY_DN31101_c0_g1	MGI|MGI:1351597	100	7.9e-53	27425	Atp5l	GO:0005753	mitochondrial proton-transporting ATP synthase complex	cellular_component	7
TRINITY_DN31101_c0_g1	MGI|MGI:1351597	100	7.9e-53	27425	Atp5l	GO:0006754	ATP biosynthetic process	biological_process	12
TRINITY_DN31101_c0_g1	MGI|MGI:1351597	100	7.9e-53	27425	Atp5l	GO:0006811	ion transport	biological_process	6
TRINITY_DN31101_c0_g1	MGI|MGI:1351597	100	7.9e-53	27425	Atp5l	GO:0008553	proton-exporting ATPase activity, phosphorylative mechanism	molecular_function	10
TRINITY_DN31101_c0_g1	MGI|MGI:1351597	100	7.9e-53	27425	Atp5l	GO:0015078	proton transmembrane transporter activity	molecular_function	9
TRINITY_DN31101_c0_g1	MGI|MGI:1351597	100	7.9e-53	27425	Atp5l	GO:0015986	ATP synthesis coupled proton transport	biological_process	13
TRINITY_DN31101_c0_g1	MGI|MGI:1351597	100	7.9e-53	27425	Atp5l	GO:0016020	membrane	cellular_component	3
TRINITY_DN31101_c0_g1	MGI|MGI:1351597	100	7.9e-53	27425	Atp5l	GO:0016887	ATPase activity	molecular_function	9
TRINITY_DN31101_c0_g1	MGI|MGI:1351597	100	7.9e-53	27425	Atp5l	GO:0045263	proton-transporting ATP synthase complex, coupling factor F(o)	cellular_component	6
TRINITY_DN31101_c0_g1	MGI|MGI:1351597	100	7.9e-53	27425	Atp5l	GO:0046034	ATP metabolic process	biological_process	4
TRINITY_DN31101_c0_g1	MGI|MGI:1351597	100	7.9e-53	27425	Atp5l	GO:0046933	proton-transporting ATP synthase activity, rotational mechanism	molecular_function	10
TRINITY_DN31155_c0_g1	UNIPROTKB|J9PAG1	63.2	2.5e-07	-	COX7C	GO:0004129	cytochrome-c oxidase activity	molecular_function	6
TRINITY_DN31155_c0_g1	UNIPROTKB|J9PAG1	63.2	2.5e-07	-	COX7C	GO:0005743	mitochondrial inner membrane	cellular_component	6
TRINITY_DN31155_c0_g1	UNIPROTKB|J9PAG1	63.2	2.5e-07	-	COX7C	GO:0016021	integral component of membrane	cellular_component	5
TRINITY_DN31155_c0_g1	UNIPROTKB|J9PAG1	63.2	2.5e-07	-	COX7C	GO:1902600	proton transmembrane transport	biological_process	9
TRINITY_DN31189_c0_g1	UNIPROTKB|P01837	100	9.7e-56	-	IGKC_MOUSE	GO:0005886	plasma membrane	cellular_component	4
TRINITY_DN31272_c0_g2	UNIPROTKB|Q24JY1	99.4	3.7e-71	507168	RPL23A	GO:0000027	ribosomal large subunit assembly	biological_process	9
TRINITY_DN31272_c0_g2	UNIPROTKB|Q24JY1	99.4	3.7e-71	507168	RPL23A	GO:0000166	nucleotide binding	molecular_function	5
TRINITY_DN31272_c0_g2	UNIPROTKB|Q24JY1	99.4	3.7e-71	507168	RPL23A	GO:0003674	molecular_function	molecular_function	2
TRINITY_DN31272_c0_g2	UNIPROTKB|Q24JY1	99.4	3.7e-71	507168	RPL23A	GO:0003735	structural constituent of ribosome	molecular_function	4
TRINITY_DN31272_c0_g2	UNIPROTKB|Q24JY1	99.4	3.7e-71	507168	RPL23A	GO:0005634	nucleus	cellular_component	6
TRINITY_DN31272_c0_g2	UNIPROTKB|Q24JY1	99.4	3.7e-71	507168	RPL23A	GO:0006412	translation	biological_process	8
TRINITY_DN31272_c0_g2	UNIPROTKB|Q24JY1	99.4	3.7e-71	507168	RPL23A	GO:0008150	biological_process	biological_process	2
TRINITY_DN31272_c0_g2	UNIPROTKB|Q24JY1	99.4	3.7e-71	507168	RPL23A	GO:0019843	rRNA binding	molecular_function	7
TRINITY_DN31272_c0_g2	UNIPROTKB|Q24JY1	99.4	3.7e-71	507168	RPL23A	GO:0022625	cytosolic large ribosomal subunit	cellular_component	8
TRINITY_DN31272_c0_g2	UNIPROTKB|Q24JY1	99.4	3.7e-71	507168	RPL23A	GO:0031932	TORC2 complex	cellular_component	4
TRINITY_DN31291_c0_g1	FB|FBgn0029958	45	3e-100	31683	Pdp	GO:0004721	phosphoprotein phosphatase activity	molecular_function	8
TRINITY_DN31291_c0_g1	FB|FBgn0029958	45	3e-100	31683	Pdp	GO:0004722	protein serine/threonine phosphatase activity	molecular_function	9
TRINITY_DN31291_c0_g1	FB|FBgn0029958	45	3e-100	31683	Pdp	GO:0004741	[pyruvate dehydrogenase (lipoamide)] phosphatase activity	molecular_function	9
TRINITY_DN31291_c0_g1	FB|FBgn0029958	45	3e-100	31683	Pdp	GO:0005634	nucleus	cellular_component	6
TRINITY_DN31291_c0_g1	FB|FBgn0029958	45	3e-100	31683	Pdp	GO:0005737	cytoplasm	cellular_component	5
TRINITY_DN31291_c0_g1	FB|FBgn0029958	45	3e-100	31683	Pdp	GO:0005739	mitochondrion	cellular_component	6
TRINITY_DN31291_c0_g1	FB|FBgn0029958	45	3e-100	31683	Pdp	GO:0005759	mitochondrial matrix	cellular_component	7
TRINITY_DN31291_c0_g1	FB|FBgn0029958	45	3e-100	31683	Pdp	GO:0006090	pyruvate metabolic process	biological_process	9
TRINITY_DN31291_c0_g1	FB|FBgn0029958	45	3e-100	31683	Pdp	GO:0006470	protein dephosphorylation	biological_process	9
TRINITY_DN31421_c0_g1	UNIPROTKB|C3YN19	40	6.9e-08	7246830	BRAFLDRAFT_228050	GO:0004842	ubiquitin-protein transferase activity	molecular_function	6
TRINITY_DN31421_c0_g1	UNIPROTKB|C3YN19	40	6.9e-08	7246830	BRAFLDRAFT_228050	GO:0031463	Cul3-RING ubiquitin ligase complex	cellular_component	7
TRINITY_DN31447_c0_g1	UNIPROTKB|Q3MIC0	100	1.9e-47	504413	RPL37A	GO:0003735	structural constituent of ribosome	molecular_function	4
TRINITY_DN31447_c0_g1	UNIPROTKB|Q3MIC0	100	1.9e-47	504413	RPL37A	GO:0005634	nucleus	cellular_component	6
TRINITY_DN31447_c0_g1	UNIPROTKB|Q3MIC0	100	1.9e-47	504413	RPL37A	GO:0005925	focal adhesion	cellular_component	7
TRINITY_DN31447_c0_g1	UNIPROTKB|Q3MIC0	100	1.9e-47	504413	RPL37A	GO:0006412	translation	biological_process	8
TRINITY_DN31447_c0_g1	UNIPROTKB|Q3MIC0	100	1.9e-47	504413	RPL37A	GO:0022625	cytosolic large ribosomal subunit	cellular_component	8
TRINITY_DN31447_c0_g1	UNIPROTKB|Q3MIC0	100	1.9e-47	504413	RPL37A	GO:0046872	metal ion binding	molecular_function	6
TRINITY_DN31447_c0_g1	UNIPROTKB|Q3MIC0	100	1.9e-47	504413	RPL37A	GO:0070062	extracellular exosome	cellular_component	7
TRINITY_DN31481_c0_g1	MGI|MGI:2384774	72.3	8.2e-22	208211	Alg1	GO:0000030	mannosyltransferase activity	molecular_function	7
TRINITY_DN31481_c0_g1	MGI|MGI:2384774	72.3	8.2e-22	208211	Alg1	GO:0004578	chitobiosyldiphosphodolichol beta-mannosyltransferase activity	molecular_function	9
TRINITY_DN31481_c0_g1	MGI|MGI:2384774	72.3	8.2e-22	208211	Alg1	GO:0005783	endoplasmic reticulum	cellular_component	6
TRINITY_DN31481_c0_g1	MGI|MGI:2384774	72.3	8.2e-22	208211	Alg1	GO:0006486	protein glycosylation	biological_process	9
TRINITY_DN31481_c0_g1	MGI|MGI:2384774	72.3	8.2e-22	208211	Alg1	GO:0016020	membrane	cellular_component	3
TRINITY_DN31481_c0_g1	MGI|MGI:2384774	72.3	8.2e-22	208211	Alg1	GO:0016021	integral component of membrane	cellular_component	5
TRINITY_DN31481_c0_g1	MGI|MGI:2384774	72.3	8.2e-22	208211	Alg1	GO:0016740	transferase activity	molecular_function	4
TRINITY_DN31481_c0_g1	MGI|MGI:2384774	72.3	8.2e-22	208211	Alg1	GO:0016757	transferase activity, transferring glycosyl groups	molecular_function	5
TRINITY_DN31496_c0_g1	UNIPROTKB|B7Q487	41.4	3.4e-18	8035677	IscW_ISCW010424	GO:0004185	serine-type carboxypeptidase activity	molecular_function	9
TRINITY_DN31496_c0_g1	UNIPROTKB|B7Q487	41.4	3.4e-18	8035677	IscW_ISCW010424	GO:0051603	proteolysis involved in cellular protein catabolic process	biological_process	8
TRINITY_DN31496_c0_g3	UNIPROTKB|B7PI01	54.9	7.7e-07	8029239	IscW_ISCW018397	GO:0004185	serine-type carboxypeptidase activity	molecular_function	9
TRINITY_DN31496_c0_g3	UNIPROTKB|B7PI01	54.9	7.7e-07	8029239	IscW_ISCW018397	GO:0051603	proteolysis involved in cellular protein catabolic process	biological_process	8
TRINITY_DN31517_c0_g1	FB|FBgn0033170	40.1	1.4e-20	35665	sPLA2	GO:0006644	phospholipid metabolic process	biological_process	7
TRINITY_DN31517_c0_g1	FB|FBgn0033170	40.1	1.4e-20	35665	sPLA2	GO:0047498	calcium-dependent phospholipase A2 activity	molecular_function	9
TRINITY_DN31517_c0_g1	FB|FBgn0033170	40.1	1.4e-20	35665	sPLA2	GO:0050482	arachidonic acid secretion	biological_process	9
TRINITY_DN31522_c0_g1	RGD|1597505	99.2	6.6e-62	100360647	LOC687780	GO:0003735	structural constituent of ribosome	molecular_function	4
TRINITY_DN31522_c0_g1	RGD|1597505	99.2	6.6e-62	100360647	LOC687780	GO:0005840	ribosome	cellular_component	6
TRINITY_DN31522_c0_g1	RGD|1597505	99.2	6.6e-62	100360647	LOC687780	GO:0006412	translation	biological_process	8
TRINITY_DN31571_c0_g1	UNIPROTKB|P03887	42.3	2.5e-37	-	MT-ND1	GO:0005747	mitochondrial respiratory chain complex I	cellular_component	7
TRINITY_DN31571_c0_g1	UNIPROTKB|P03887	42.3	2.5e-37	-	MT-ND1	GO:0008137	NADH dehydrogenase (ubiquinone) activity	molecular_function	8
TRINITY_DN31571_c0_g1	UNIPROTKB|P03887	42.3	2.5e-37	-	MT-ND1	GO:0016021	integral component of membrane	cellular_component	5
TRINITY_DN31571_c0_g1	UNIPROTKB|P03887	42.3	2.5e-37	-	MT-ND1	GO:0055114	oxidation-reduction process	biological_process	4
TRINITY_DN31654_c0_g1	UNIPROTKB|P35268	100	5.3e-62	6146	RPL22	GO:0000184	nuclear-transcribed mRNA catabolic process, nonsense-mediated decay	biological_process	12
TRINITY_DN31654_c0_g1	UNIPROTKB|P35268	100	5.3e-62	6146	RPL22	GO:0002181	cytoplasmic translation	biological_process	9
TRINITY_DN31654_c0_g1	UNIPROTKB|P35268	100	5.3e-62	6146	RPL22	GO:0003723	RNA binding	molecular_function	6
TRINITY_DN31654_c0_g1	UNIPROTKB|P35268	100	5.3e-62	6146	RPL22	GO:0003735	structural constituent of ribosome	molecular_function	4
TRINITY_DN31654_c0_g1	UNIPROTKB|P35268	100	5.3e-62	6146	RPL22	GO:0005515	protein binding	molecular_function	4
TRINITY_DN31654_c0_g1	UNIPROTKB|P35268	100	5.3e-62	6146	RPL22	GO:0005634	nucleus	cellular_component	6
TRINITY_DN31654_c0_g1	UNIPROTKB|P35268	100	5.3e-62	6146	RPL22	GO:0005737	cytoplasm	cellular_component	5
TRINITY_DN31654_c0_g1	UNIPROTKB|P35268	100	5.3e-62	6146	RPL22	GO:0005829	cytosol	cellular_component	6
TRINITY_DN31654_c0_g1	UNIPROTKB|P35268	100	5.3e-62	6146	RPL22	GO:0005925	focal adhesion	cellular_component	7
TRINITY_DN31654_c0_g1	UNIPROTKB|P35268	100	5.3e-62	6146	RPL22	GO:0006364	rRNA processing	biological_process	11
TRINITY_DN31654_c0_g1	UNIPROTKB|P35268	100	5.3e-62	6146	RPL22	GO:0006412	translation	biological_process	8
TRINITY_DN31654_c0_g1	UNIPROTKB|P35268	100	5.3e-62	6146	RPL22	GO:0006413	translational initiation	biological_process	5
TRINITY_DN31654_c0_g1	UNIPROTKB|P35268	100	5.3e-62	6146	RPL22	GO:0006614	SRP-dependent cotranslational protein targeting to membrane	biological_process	14
TRINITY_DN31654_c0_g1	UNIPROTKB|P35268	100	5.3e-62	6146	RPL22	GO:0008201	heparin binding	molecular_function	6
TRINITY_DN31654_c0_g1	UNIPROTKB|P35268	100	5.3e-62	6146	RPL22	GO:0019083	viral transcription	biological_process	7
TRINITY_DN31654_c0_g1	UNIPROTKB|P35268	100	5.3e-62	6146	RPL22	GO:0022625	cytosolic large ribosomal subunit	cellular_component	8
TRINITY_DN31654_c0_g1	UNIPROTKB|P35268	100	5.3e-62	6146	RPL22	GO:0046632	alpha-beta T cell differentiation	biological_process	9
TRINITY_DN31654_c0_g1	UNIPROTKB|P35268	100	5.3e-62	6146	RPL22	GO:0070062	extracellular exosome	cellular_component	7
TRINITY_DN31691_c0_g1	UNIPROTKB|F1P099	52.4	2.5e-20	771459	ARSB	GO:0003943	N-acetylgalactosamine-4-sulfatase activity	molecular_function	7
TRINITY_DN31691_c0_g1	UNIPROTKB|F1P099	52.4	2.5e-20	771459	ARSB	GO:0008152	metabolic process	biological_process	3
TRINITY_DN31691_c0_g1	UNIPROTKB|F1P099	52.4	2.5e-20	771459	ARSB	GO:0010632	regulation of epithelial cell migration	biological_process	8
TRINITY_DN31691_c0_g1	UNIPROTKB|F1P099	52.4	2.5e-20	771459	ARSB	GO:0061580	colon epithelial cell migration	biological_process	10
TRINITY_DN31691_c0_g1	UNIPROTKB|F1P099	52.4	2.5e-20	771459	ARSB	GO:0070062	extracellular exosome	cellular_component	7
TRINITY_DN31726_c0_g1	UNIPROTKB|E1BIZ7	49.6	2.1e-22	-	MLXIP	GO:0003700	DNA binding transcription factor activity	molecular_function	4
TRINITY_DN31726_c0_g1	UNIPROTKB|E1BIZ7	49.6	2.1e-22	-	MLXIP	GO:0005634	nucleus	cellular_component	6
TRINITY_DN31726_c0_g1	UNIPROTKB|E1BIZ7	49.6	2.1e-22	-	MLXIP	GO:0006357	regulation of transcription by RNA polymerase II	biological_process	9
TRINITY_DN31726_c0_g1	UNIPROTKB|E1BIZ7	49.6	2.1e-22	-	MLXIP	GO:0046983	protein dimerization activity	molecular_function	5
TRINITY_DN31726_c0_g1	UNIPROTKB|E1BIZ7	49.6	2.1e-22	-	MLXIP	GO:1900402	regulation of carbohydrate metabolic process by regulation of transcription from RNA polymerase II promoter	biological_process	8
TRINITY_DN31750_c0_g1	RGD|1586251	93.2	4.3e-105	691259	Lypd8	GO:0005615	extracellular space	cellular_component	4
TRINITY_DN31750_c0_g1	RGD|1586251	93.2	4.3e-105	691259	Lypd8	GO:0050829	defense response to Gram-negative bacterium	biological_process	9
TRINITY_DN31770_c0_g1	UNIPROTKB|B7P2S7	82.4	8.9e-272	8023765	IscW_ISCW016122	GO:0004930	G-protein coupled receptor activity	molecular_function	6
TRINITY_DN31770_c0_g1	UNIPROTKB|B7P2S7	82.4	8.9e-272	8023765	IscW_ISCW016122	GO:0016021	integral component of membrane	cellular_component	5
TRINITY_DN31770_c0_g1	UNIPROTKB|B7P2S7	82.4	8.9e-272	8023765	IscW_ISCW016122	GO:0017147	Wnt-protein binding	molecular_function	5
TRINITY_DN31770_c0_g1	UNIPROTKB|B7P2S7	82.4	8.9e-272	8023765	IscW_ISCW016122	GO:0035567	non-canonical Wnt signaling pathway	biological_process	8
TRINITY_DN31770_c0_g1	UNIPROTKB|B7P2S7	82.4	8.9e-272	8023765	IscW_ISCW016122	GO:0042813	Wnt-activated receptor activity	molecular_function	6
TRINITY_DN31770_c0_g1	UNIPROTKB|B7P2S7	82.4	8.9e-272	8023765	IscW_ISCW016122	GO:0060070	canonical Wnt signaling pathway	biological_process	8
TRINITY_DN31796_c0_g3	UNIPROTKB|B7Q2U5	32.9	2.3e-08	8035064	IscW_ISCW020282	GO:0016491	oxidoreductase activity	molecular_function	4
TRINITY_DN3180_c0_g1	FB|FBgn0033936	54.5	2.6e-23	36605	Achl	GO:0003674	molecular_function	molecular_function	2
TRINITY_DN3180_c0_g1	FB|FBgn0033936	54.5	2.6e-23	36605	Achl	GO:0003676	nucleic acid binding	molecular_function	5
TRINITY_DN3180_c0_g1	FB|FBgn0033936	54.5	2.6e-23	36605	Achl	GO:0005575	cellular_component	cellular_component	2
TRINITY_DN3180_c0_g1	FB|FBgn0033936	54.5	2.6e-23	36605	Achl	GO:0010629	negative regulation of gene expression	biological_process	8
TRINITY_DN31860_c0_g1	UNIPROTKB|B7PKP3	41.5	1.4e-34	8053002	IscW_ISCW006201	GO:0005737	cytoplasm	cellular_component	5
TRINITY_DN31860_c0_g1	UNIPROTKB|B7PKP3	41.5	1.4e-34	8053002	IscW_ISCW006201	GO:0008757	S-adenosylmethionine-dependent methyltransferase activity	molecular_function	7
TRINITY_DN31860_c0_g1	UNIPROTKB|B7PKP3	41.5	1.4e-34	8053002	IscW_ISCW006201	GO:0032259	methylation	biological_process	4
TRINITY_DN31862_c0_g1	UNIPROTKB|B7QIF0	90.6	2.6e-42	8041725	IscW_ISCW014561	GO:0000398	mRNA splicing, via spliceosome	biological_process	13
TRINITY_DN31862_c0_g1	UNIPROTKB|B7QIF0	90.6	2.6e-42	8041725	IscW_ISCW014561	GO:0005686	U2 snRNP	cellular_component	8
TRINITY_DN31862_c0_g1	UNIPROTKB|B7QIF0	90.6	2.6e-42	8041725	IscW_ISCW014561	GO:0005689	U12-type spliceosomal complex	cellular_component	7
TRINITY_DN31862_c0_g1	UNIPROTKB|B7QIF0	90.6	2.6e-42	8041725	IscW_ISCW014561	GO:0071011	precatalytic spliceosome	cellular_component	7
TRINITY_DN31869_c0_g1	UNIPROTKB|P68103	100	2.5e-82	282220	EEF1A1	GO:0000049	tRNA binding	molecular_function	7
TRINITY_DN31869_c0_g1	UNIPROTKB|P68103	100	2.5e-82	282220	EEF1A1	GO:0003746	translation elongation factor activity	molecular_function	8
TRINITY_DN31869_c0_g1	UNIPROTKB|P68103	100	2.5e-82	282220	EEF1A1	GO:0003924	GTPase activity	molecular_function	9
TRINITY_DN31869_c0_g1	UNIPROTKB|P68103	100	2.5e-82	282220	EEF1A1	GO:0005515	protein binding	molecular_function	4
TRINITY_DN31869_c0_g1	UNIPROTKB|P68103	100	2.5e-82	282220	EEF1A1	GO:0005525	GTP binding	molecular_function	8
TRINITY_DN31869_c0_g1	UNIPROTKB|P68103	100	2.5e-82	282220	EEF1A1	GO:0005615	extracellular space	cellular_component	4
TRINITY_DN31869_c0_g1	UNIPROTKB|P68103	100	2.5e-82	282220	EEF1A1	GO:0005622	intracellular	cellular_component	4
TRINITY_DN31869_c0_g1	UNIPROTKB|P68103	100	2.5e-82	282220	EEF1A1	GO:0005634	nucleus	cellular_component	6
TRINITY_DN31869_c0_g1	UNIPROTKB|P68103	100	2.5e-82	282220	EEF1A1	GO:0005730	nucleolus	cellular_component	6
TRINITY_DN31869_c0_g1	UNIPROTKB|P68103	100	2.5e-82	282220	EEF1A1	GO:0005737	cytoplasm	cellular_component	5
TRINITY_DN31869_c0_g1	UNIPROTKB|P68103	100	2.5e-82	282220	EEF1A1	GO:0005829	cytosol	cellular_component	6
TRINITY_DN31869_c0_g1	UNIPROTKB|P68103	100	2.5e-82	282220	EEF1A1	GO:0006414	translational elongation	biological_process	8
TRINITY_DN31869_c0_g1	UNIPROTKB|P68103	100	2.5e-82	282220	EEF1A1	GO:0019901	protein kinase binding	molecular_function	7
TRINITY_DN31869_c0_g1	UNIPROTKB|P68103	100	2.5e-82	282220	EEF1A1	GO:0030864	cortical actin cytoskeleton	cellular_component	8
TRINITY_DN31869_c0_g1	UNIPROTKB|P68103	100	2.5e-82	282220	EEF1A1	GO:0032587	ruffle membrane	cellular_component	6
TRINITY_DN31869_c0_g1	UNIPROTKB|P68103	100	2.5e-82	282220	EEF1A1	GO:0070062	extracellular exosome	cellular_component	7
TRINITY_DN31869_c0_g1	UNIPROTKB|P68103	100	2.5e-82	282220	EEF1A1	GO:0071364	cellular response to epidermal growth factor stimulus	biological_process	6
TRINITY_DN31894_c0_g1	UNIPROTKB|Q66KB9	50	1.5e-12	493563	bloc1s2	GO:0008089	anterograde axonal transport	biological_process	11
TRINITY_DN31894_c0_g1	UNIPROTKB|Q66KB9	50	1.5e-12	493563	bloc1s2	GO:0031175	neuron projection development	biological_process	7
TRINITY_DN31894_c0_g1	UNIPROTKB|Q66KB9	50	1.5e-12	493563	bloc1s2	GO:0048490	anterograde synaptic vesicle transport	biological_process	12
TRINITY_DN31989_c0_g1	UNIPROTKB|E1BU66	100	4e-31	771528	RPL38	GO:0001501	skeletal system development	biological_process	6
TRINITY_DN31989_c0_g1	UNIPROTKB|E1BU66	100	4e-31	771528	RPL38	GO:0001503	ossification	biological_process	4
TRINITY_DN31989_c0_g1	UNIPROTKB|E1BU66	100	4e-31	771528	RPL38	GO:0003723	RNA binding	molecular_function	6
TRINITY_DN31989_c0_g1	UNIPROTKB|E1BU66	100	4e-31	771528	RPL38	GO:0003735	structural constituent of ribosome	molecular_function	4
TRINITY_DN31989_c0_g1	UNIPROTKB|E1BU66	100	4e-31	771528	RPL38	GO:0005925	focal adhesion	cellular_component	7
TRINITY_DN31989_c0_g1	UNIPROTKB|E1BU66	100	4e-31	771528	RPL38	GO:0006412	translation	biological_process	8
TRINITY_DN31989_c0_g1	UNIPROTKB|E1BU66	100	4e-31	771528	RPL38	GO:0006417	regulation of translation	biological_process	9
TRINITY_DN31989_c0_g1	UNIPROTKB|E1BU66	100	4e-31	771528	RPL38	GO:0007605	sensory perception of sound	biological_process	8
TRINITY_DN31989_c0_g1	UNIPROTKB|E1BU66	100	4e-31	771528	RPL38	GO:0022618	ribonucleoprotein complex assembly	biological_process	8
TRINITY_DN31989_c0_g1	UNIPROTKB|E1BU66	100	4e-31	771528	RPL38	GO:0022625	cytosolic large ribosomal subunit	cellular_component	8
TRINITY_DN31989_c0_g1	UNIPROTKB|E1BU66	100	4e-31	771528	RPL38	GO:0033291	eukaryotic 80S initiation complex	cellular_component	7
TRINITY_DN31989_c0_g1	UNIPROTKB|E1BU66	100	4e-31	771528	RPL38	GO:0034463	90S preribosome assembly	biological_process	9
TRINITY_DN31989_c0_g1	UNIPROTKB|E1BU66	100	4e-31	771528	RPL38	GO:0042474	middle ear morphogenesis	biological_process	6
TRINITY_DN31989_c0_g1	UNIPROTKB|E1BU66	100	4e-31	771528	RPL38	GO:0048318	axial mesoderm development	biological_process	7
TRINITY_DN32044_c0_g1	TAIR|locus:2074984	94.6	7.2e-45	820102	AT3G09440	GO:0002020	protease binding	molecular_function	6
TRINITY_DN32044_c0_g1	TAIR|locus:2074984	94.6	7.2e-45	820102	AT3G09440	GO:0005515	protein binding	molecular_function	4
TRINITY_DN32044_c0_g1	TAIR|locus:2074984	94.6	7.2e-45	820102	AT3G09440	GO:0005524	ATP binding	molecular_function	5
TRINITY_DN32044_c0_g1	TAIR|locus:2074984	94.6	7.2e-45	820102	AT3G09440	GO:0005618	cell wall	cellular_component	5
TRINITY_DN32044_c0_g1	TAIR|locus:2074984	94.6	7.2e-45	820102	AT3G09440	GO:0005773	vacuole	cellular_component	6
TRINITY_DN32044_c0_g1	TAIR|locus:2074984	94.6	7.2e-45	820102	AT3G09440	GO:0005774	vacuolar membrane	cellular_component	7
TRINITY_DN32044_c0_g1	TAIR|locus:2074984	94.6	7.2e-45	820102	AT3G09440	GO:0005794	Golgi apparatus	cellular_component	6
TRINITY_DN32044_c0_g1	TAIR|locus:2074984	94.6	7.2e-45	820102	AT3G09440	GO:0005829	cytosol	cellular_component	6
TRINITY_DN32044_c0_g1	TAIR|locus:2074984	94.6	7.2e-45	820102	AT3G09440	GO:0005886	plasma membrane	cellular_component	4
TRINITY_DN32044_c0_g1	TAIR|locus:2074984	94.6	7.2e-45	820102	AT3G09440	GO:0006457	protein folding	biological_process	4
TRINITY_DN32044_c0_g1	TAIR|locus:2074984	94.6	7.2e-45	820102	AT3G09440	GO:0009408	response to heat	biological_process	5
TRINITY_DN32044_c0_g1	TAIR|locus:2074984	94.6	7.2e-45	820102	AT3G09440	GO:0009506	plasmodesma	cellular_component	5
TRINITY_DN32044_c0_g1	TAIR|locus:2074984	94.6	7.2e-45	820102	AT3G09440	GO:0009507	chloroplast	cellular_component	7
TRINITY_DN32044_c0_g1	TAIR|locus:2074984	94.6	7.2e-45	820102	AT3G09440	GO:0009615	response to virus	biological_process	7
TRINITY_DN32044_c0_g1	TAIR|locus:2074984	94.6	7.2e-45	820102	AT3G09440	GO:0016363	nuclear matrix	cellular_component	6
TRINITY_DN32044_c0_g1	TAIR|locus:2074984	94.6	7.2e-45	820102	AT3G09440	GO:0022626	cytosolic ribosome	cellular_component	7
TRINITY_DN32044_c0_g1	TAIR|locus:2074984	94.6	7.2e-45	820102	AT3G09440	GO:0034620	cellular response to unfolded protein	biological_process	7
TRINITY_DN32044_c0_g1	TAIR|locus:2074984	94.6	7.2e-45	820102	AT3G09440	GO:0046686	response to cadmium ion	biological_process	7
TRINITY_DN32044_c0_g1	TAIR|locus:2074984	94.6	7.2e-45	820102	AT3G09440	GO:0048046	apoplast	cellular_component	4
TRINITY_DN32044_c0_g1	TAIR|locus:2074984	94.6	7.2e-45	820102	AT3G09440	GO:0080167	response to karrikin	biological_process	5
TRINITY_DN32044_c0_g2	TAIR|locus:2181818	84	6.3e-31	831856	Hsp70-2	GO:0005515	protein binding	molecular_function	4
TRINITY_DN32044_c0_g2	TAIR|locus:2181818	84	6.3e-31	831856	Hsp70-2	GO:0005524	ATP binding	molecular_function	5
TRINITY_DN32044_c0_g2	TAIR|locus:2181818	84	6.3e-31	831856	Hsp70-2	GO:0005618	cell wall	cellular_component	5
TRINITY_DN32044_c0_g2	TAIR|locus:2181818	84	6.3e-31	831856	Hsp70-2	GO:0005634	nucleus	cellular_component	6
TRINITY_DN32044_c0_g2	TAIR|locus:2181818	84	6.3e-31	831856	Hsp70-2	GO:0005794	Golgi apparatus	cellular_component	6
TRINITY_DN32044_c0_g2	TAIR|locus:2181818	84	6.3e-31	831856	Hsp70-2	GO:0005829	cytosol	cellular_component	6
TRINITY_DN32044_c0_g2	TAIR|locus:2181818	84	6.3e-31	831856	Hsp70-2	GO:0005886	plasma membrane	cellular_component	4
TRINITY_DN32044_c0_g2	TAIR|locus:2181818	84	6.3e-31	831856	Hsp70-2	GO:0006351	transcription, DNA-templated	biological_process	8
TRINITY_DN32044_c0_g2	TAIR|locus:2181818	84	6.3e-31	831856	Hsp70-2	GO:0006355	regulation of transcription, DNA-templated	biological_process	8
TRINITY_DN32044_c0_g2	TAIR|locus:2181818	84	6.3e-31	831856	Hsp70-2	GO:0006457	protein folding	biological_process	4
TRINITY_DN32044_c0_g2	TAIR|locus:2181818	84	6.3e-31	831856	Hsp70-2	GO:0009408	response to heat	biological_process	5
TRINITY_DN32044_c0_g2	TAIR|locus:2181818	84	6.3e-31	831856	Hsp70-2	GO:0009615	response to virus	biological_process	7
TRINITY_DN32044_c0_g2	TAIR|locus:2181818	84	6.3e-31	831856	Hsp70-2	GO:0009617	response to bacterium	biological_process	7
TRINITY_DN32044_c0_g2	TAIR|locus:2181818	84	6.3e-31	831856	Hsp70-2	GO:0034620	cellular response to unfolded protein	biological_process	7
TRINITY_DN32044_c0_g2	TAIR|locus:2181818	84	6.3e-31	831856	Hsp70-2	GO:0046686	response to cadmium ion	biological_process	7
TRINITY_DN32093_c0_g1	RGD|621157	100	4.3e-56	116484	Txn1	GO:0000122	negative regulation of transcription by RNA polymerase II	biological_process	10
TRINITY_DN32093_c0_g1	RGD|621157	100	4.3e-56	116484	Txn1	GO:0003723	RNA binding	molecular_function	6
TRINITY_DN32093_c0_g1	RGD|621157	100	4.3e-56	116484	Txn1	GO:0004791	thioredoxin-disulfide reductase activity	molecular_function	7
TRINITY_DN32093_c0_g1	RGD|621157	100	4.3e-56	116484	Txn1	GO:0005634	nucleus	cellular_component	6
TRINITY_DN32093_c0_g1	RGD|621157	100	4.3e-56	116484	Txn1	GO:0005737	cytoplasm	cellular_component	5
TRINITY_DN32093_c0_g1	RGD|621157	100	4.3e-56	116484	Txn1	GO:0005739	mitochondrion	cellular_component	6
TRINITY_DN32093_c0_g1	RGD|621157	100	4.3e-56	116484	Txn1	GO:0005829	cytosol	cellular_component	6
TRINITY_DN32093_c0_g1	RGD|621157	100	4.3e-56	116484	Txn1	GO:0006351	transcription, DNA-templated	biological_process	8
TRINITY_DN32093_c0_g1	RGD|621157	100	4.3e-56	116484	Txn1	GO:0006662	glycerol ether metabolic process	biological_process	6
TRINITY_DN32093_c0_g1	RGD|621157	100	4.3e-56	116484	Txn1	GO:0009314	response to radiation	biological_process	5
TRINITY_DN32093_c0_g1	RGD|621157	100	4.3e-56	116484	Txn1	GO:0010269	response to selenium ion	biological_process	6
TRINITY_DN32093_c0_g1	RGD|621157	100	4.3e-56	116484	Txn1	GO:0014823	response to activity	biological_process	4
TRINITY_DN32093_c0_g1	RGD|621157	100	4.3e-56	116484	Txn1	GO:0015035	protein disulfide oxidoreductase activity	molecular_function	7
TRINITY_DN32093_c0_g1	RGD|621157	100	4.3e-56	116484	Txn1	GO:0015037	peptide disulfide oxidoreductase activity	molecular_function	7
TRINITY_DN32093_c0_g1	RGD|621157	100	4.3e-56	116484	Txn1	GO:0016671	oxidoreductase activity, acting on a sulfur group of donors, disulfide as acceptor	molecular_function	6
TRINITY_DN32093_c0_g1	RGD|621157	100	4.3e-56	116484	Txn1	GO:0019899	enzyme binding	molecular_function	5
TRINITY_DN32093_c0_g1	RGD|621157	100	4.3e-56	116484	Txn1	GO:0030424	axon	cellular_component	6
TRINITY_DN32093_c0_g1	RGD|621157	100	4.3e-56	116484	Txn1	GO:0030425	dendrite	cellular_component	6
TRINITY_DN32093_c0_g1	RGD|621157	100	4.3e-56	116484	Txn1	GO:0033138	positive regulation of peptidyl-serine phosphorylation	biological_process	11
TRINITY_DN32093_c0_g1	RGD|621157	100	4.3e-56	116484	Txn1	GO:0034599	cellular response to oxidative stress	biological_process	6
TRINITY_DN32093_c0_g1	RGD|621157	100	4.3e-56	116484	Txn1	GO:0035690	cellular response to drug	biological_process	6
TRINITY_DN32093_c0_g1	RGD|621157	100	4.3e-56	116484	Txn1	GO:0042493	response to drug	biological_process	5
TRINITY_DN32093_c0_g1	RGD|621157	100	4.3e-56	116484	Txn1	GO:0043025	neuronal cell body	cellular_component	5
TRINITY_DN32093_c0_g1	RGD|621157	100	4.3e-56	116484	Txn1	GO:0043388	positive regulation of DNA binding	biological_process	7
TRINITY_DN32093_c0_g1	RGD|621157	100	4.3e-56	116484	Txn1	GO:0045454	cell redox homeostasis	biological_process	5
TRINITY_DN32093_c0_g1	RGD|621157	100	4.3e-56	116484	Txn1	GO:0046826	negative regulation of protein export from nucleus	biological_process	10
TRINITY_DN32093_c0_g1	RGD|621157	100	4.3e-56	116484	Txn1	GO:0047134	protein-disulfide reductase activity	molecular_function	7
TRINITY_DN32093_c0_g1	RGD|621157	100	4.3e-56	116484	Txn1	GO:0048678	response to axon injury	biological_process	6
TRINITY_DN32093_c0_g1	RGD|621157	100	4.3e-56	116484	Txn1	GO:0055114	oxidation-reduction process	biological_process	4
TRINITY_DN32093_c0_g1	RGD|621157	100	4.3e-56	116484	Txn1	GO:0070062	extracellular exosome	cellular_component	7
TRINITY_DN32093_c0_g1	RGD|621157	100	4.3e-56	116484	Txn1	GO:0071236	cellular response to antibiotic	biological_process	6
TRINITY_DN32093_c0_g1	RGD|621157	100	4.3e-56	116484	Txn1	GO:0071333	cellular response to glucose stimulus	biological_process	10
TRINITY_DN32093_c0_g1	RGD|621157	100	4.3e-56	116484	Txn1	GO:0071455	cellular response to hyperoxia	biological_process	6
TRINITY_DN32093_c0_g1	RGD|621157	100	4.3e-56	116484	Txn1	GO:0071548	response to dexamethasone	biological_process	6
TRINITY_DN32093_c0_g1	RGD|621157	100	4.3e-56	116484	Txn1	GO:0097068	response to thyroxine	biological_process	7
TRINITY_DN32093_c0_g1	RGD|621157	100	4.3e-56	116484	Txn1	GO:0098869	cellular oxidant detoxification	biological_process	5
TRINITY_DN32093_c0_g1	RGD|621157	100	4.3e-56	116484	Txn1	GO:1903206	negative regulation of hydrogen peroxide-induced cell death	biological_process	10
TRINITY_DN32111_c0_g1	UNIPROTKB|F1P0Z3	49.6	1.6e-27	417031	PLBD2	GO:0005764	lysosome	cellular_component	8
TRINITY_DN32111_c0_g1	UNIPROTKB|F1P0Z3	49.6	1.6e-27	417031	PLBD2	GO:0070062	extracellular exosome	cellular_component	7
TRINITY_DN32120_c0_g3	UNIPROTKB|E2QYD8	100	7.9e-59	478597	RPL35A	GO:0002181	cytoplasmic translation	biological_process	9
TRINITY_DN32120_c0_g3	UNIPROTKB|E2QYD8	100	7.9e-59	478597	RPL35A	GO:0003735	structural constituent of ribosome	molecular_function	4
TRINITY_DN32120_c0_g3	UNIPROTKB|E2QYD8	100	7.9e-59	478597	RPL35A	GO:0005739	mitochondrion	cellular_component	6
TRINITY_DN32120_c0_g3	UNIPROTKB|E2QYD8	100	7.9e-59	478597	RPL35A	GO:0006364	rRNA processing	biological_process	11
TRINITY_DN32120_c0_g3	UNIPROTKB|E2QYD8	100	7.9e-59	478597	RPL35A	GO:0016020	membrane	cellular_component	3
TRINITY_DN32120_c0_g3	UNIPROTKB|E2QYD8	100	7.9e-59	478597	RPL35A	GO:0022625	cytosolic large ribosomal subunit	cellular_component	8
TRINITY_DN32120_c0_g3	UNIPROTKB|E2QYD8	100	7.9e-59	478597	RPL35A	GO:0042273	ribosomal large subunit biogenesis	biological_process	6
TRINITY_DN32120_c0_g3	UNIPROTKB|E2QYD8	100	7.9e-59	478597	RPL35A	GO:0070062	extracellular exosome	cellular_component	7
TRINITY_DN32167_c0_g1	UNIPROTKB|B7PDY7	84.4	1.8e-116	8028476	IscW_ISCW004924	GO:0000814	ESCRT II complex	cellular_component	5
TRINITY_DN32167_c0_g1	UNIPROTKB|B7PDY7	84.4	1.8e-116	8028476	IscW_ISCW004924	GO:0043328	protein transport to vacuole involved in ubiquitin-dependent protein catabolic process via the multivesicular body sorting pathway	biological_process	11
TRINITY_DN32326_c0_g1	UNIPROTKB|J9NYL5	100	2.7e-67	-	RPL31	GO:0002181	cytoplasmic translation	biological_process	9
TRINITY_DN32326_c0_g1	UNIPROTKB|J9NYL5	100	2.7e-67	-	RPL31	GO:0003735	structural constituent of ribosome	molecular_function	4
TRINITY_DN32326_c0_g1	UNIPROTKB|J9NYL5	100	2.7e-67	-	RPL31	GO:0022625	cytosolic large ribosomal subunit	cellular_component	8
TRINITY_DN32330_c0_g1	TAIR|locus:2049359	82.6	5.1e-37	816705	RBGA3	GO:0000380	alternative mRNA splicing, via spliceosome	biological_process	14
TRINITY_DN32330_c0_g1	TAIR|locus:2049359	82.6	5.1e-37	816705	RBGA3	GO:0003690	double-stranded DNA binding	molecular_function	7
TRINITY_DN32330_c0_g1	TAIR|locus:2049359	82.6	5.1e-37	816705	RBGA3	GO:0003697	single-stranded DNA binding	molecular_function	7
TRINITY_DN32330_c0_g1	TAIR|locus:2049359	82.6	5.1e-37	816705	RBGA3	GO:0003723	RNA binding	molecular_function	6
TRINITY_DN32330_c0_g1	TAIR|locus:2049359	82.6	5.1e-37	816705	RBGA3	GO:0003729	mRNA binding	molecular_function	7
TRINITY_DN32330_c0_g1	TAIR|locus:2049359	82.6	5.1e-37	816705	RBGA3	GO:0005515	protein binding	molecular_function	4
TRINITY_DN32330_c0_g1	TAIR|locus:2049359	82.6	5.1e-37	816705	RBGA3	GO:0005634	nucleus	cellular_component	6
TRINITY_DN32330_c0_g1	TAIR|locus:2049359	82.6	5.1e-37	816705	RBGA3	GO:0005737	cytoplasm	cellular_component	5
TRINITY_DN32330_c0_g1	TAIR|locus:2049359	82.6	5.1e-37	816705	RBGA3	GO:0005739	mitochondrion	cellular_component	6
TRINITY_DN32330_c0_g1	TAIR|locus:2049359	82.6	5.1e-37	816705	RBGA3	GO:0005777	peroxisome	cellular_component	7
TRINITY_DN32330_c0_g1	TAIR|locus:2049359	82.6	5.1e-37	816705	RBGA3	GO:0005829	cytosol	cellular_component	6
TRINITY_DN32330_c0_g1	TAIR|locus:2049359	82.6	5.1e-37	816705	RBGA3	GO:0006406	mRNA export from nucleus	biological_process	11
TRINITY_DN32330_c0_g1	TAIR|locus:2049359	82.6	5.1e-37	816705	RBGA3	GO:0006970	response to osmotic stress	biological_process	5
TRINITY_DN32330_c0_g1	TAIR|locus:2049359	82.6	5.1e-37	816705	RBGA3	GO:0007623	circadian rhythm	biological_process	4
TRINITY_DN32330_c0_g1	TAIR|locus:2049359	82.6	5.1e-37	816705	RBGA3	GO:0009409	response to cold	biological_process	5
TRINITY_DN32330_c0_g1	TAIR|locus:2049359	82.6	5.1e-37	816705	RBGA3	GO:0009414	response to water deprivation	biological_process	5
TRINITY_DN32330_c0_g1	TAIR|locus:2049359	82.6	5.1e-37	816705	RBGA3	GO:0009506	plasmodesma	cellular_component	5
TRINITY_DN32330_c0_g1	TAIR|locus:2049359	82.6	5.1e-37	816705	RBGA3	GO:0009507	chloroplast	cellular_component	7
TRINITY_DN32330_c0_g1	TAIR|locus:2049359	82.6	5.1e-37	816705	RBGA3	GO:0009651	response to salt stress	biological_process	6
TRINITY_DN32330_c0_g1	TAIR|locus:2049359	82.6	5.1e-37	816705	RBGA3	GO:0009735	response to cytokinin	biological_process	6
TRINITY_DN32330_c0_g1	TAIR|locus:2049359	82.6	5.1e-37	816705	RBGA3	GO:0010043	response to zinc ion	biological_process	7
TRINITY_DN32330_c0_g1	TAIR|locus:2049359	82.6	5.1e-37	816705	RBGA3	GO:0010119	regulation of stomatal movement	biological_process	6
TRINITY_DN32330_c0_g1	TAIR|locus:2049359	82.6	5.1e-37	816705	RBGA3	GO:0010228	vegetative to reproductive phase transition of meristem	biological_process	5
TRINITY_DN32330_c0_g1	TAIR|locus:2049359	82.6	5.1e-37	816705	RBGA3	GO:0010501	RNA secondary structure unwinding	biological_process	9
TRINITY_DN32330_c0_g1	TAIR|locus:2049359	82.6	5.1e-37	816705	RBGA3	GO:0032508	DNA duplex unwinding	biological_process	9
TRINITY_DN32330_c0_g1	TAIR|locus:2049359	82.6	5.1e-37	816705	RBGA3	GO:0045087	innate immune response	biological_process	5
TRINITY_DN32330_c0_g1	TAIR|locus:2049359	82.6	5.1e-37	816705	RBGA3	GO:0046686	response to cadmium ion	biological_process	7
TRINITY_DN32330_c0_g1	TAIR|locus:2049359	82.6	5.1e-37	816705	RBGA3	GO:0048046	apoplast	cellular_component	4
TRINITY_DN32330_c0_g2	TAIR|locus:2049359	78.8	1.5e-32	816705	RBGA3	GO:0000380	alternative mRNA splicing, via spliceosome	biological_process	14
TRINITY_DN32330_c0_g2	TAIR|locus:2049359	78.8	1.5e-32	816705	RBGA3	GO:0003690	double-stranded DNA binding	molecular_function	7
TRINITY_DN32330_c0_g2	TAIR|locus:2049359	78.8	1.5e-32	816705	RBGA3	GO:0003697	single-stranded DNA binding	molecular_function	7
TRINITY_DN32330_c0_g2	TAIR|locus:2049359	78.8	1.5e-32	816705	RBGA3	GO:0003723	RNA binding	molecular_function	6
TRINITY_DN32330_c0_g2	TAIR|locus:2049359	78.8	1.5e-32	816705	RBGA3	GO:0003729	mRNA binding	molecular_function	7
TRINITY_DN32330_c0_g2	TAIR|locus:2049359	78.8	1.5e-32	816705	RBGA3	GO:0005515	protein binding	molecular_function	4
TRINITY_DN32330_c0_g2	TAIR|locus:2049359	78.8	1.5e-32	816705	RBGA3	GO:0005634	nucleus	cellular_component	6
TRINITY_DN32330_c0_g2	TAIR|locus:2049359	78.8	1.5e-32	816705	RBGA3	GO:0005737	cytoplasm	cellular_component	5
TRINITY_DN32330_c0_g2	TAIR|locus:2049359	78.8	1.5e-32	816705	RBGA3	GO:0005739	mitochondrion	cellular_component	6
TRINITY_DN32330_c0_g2	TAIR|locus:2049359	78.8	1.5e-32	816705	RBGA3	GO:0005777	peroxisome	cellular_component	7
TRINITY_DN32330_c0_g2	TAIR|locus:2049359	78.8	1.5e-32	816705	RBGA3	GO:0005829	cytosol	cellular_component	6
TRINITY_DN32330_c0_g2	TAIR|locus:2049359	78.8	1.5e-32	816705	RBGA3	GO:0006406	mRNA export from nucleus	biological_process	11
TRINITY_DN32330_c0_g2	TAIR|locus:2049359	78.8	1.5e-32	816705	RBGA3	GO:0006970	response to osmotic stress	biological_process	5
TRINITY_DN32330_c0_g2	TAIR|locus:2049359	78.8	1.5e-32	816705	RBGA3	GO:0007623	circadian rhythm	biological_process	4
TRINITY_DN32330_c0_g2	TAIR|locus:2049359	78.8	1.5e-32	816705	RBGA3	GO:0009409	response to cold	biological_process	5
TRINITY_DN32330_c0_g2	TAIR|locus:2049359	78.8	1.5e-32	816705	RBGA3	GO:0009414	response to water deprivation	biological_process	5
TRINITY_DN32330_c0_g2	TAIR|locus:2049359	78.8	1.5e-32	816705	RBGA3	GO:0009506	plasmodesma	cellular_component	5
TRINITY_DN32330_c0_g2	TAIR|locus:2049359	78.8	1.5e-32	816705	RBGA3	GO:0009507	chloroplast	cellular_component	7
TRINITY_DN32330_c0_g2	TAIR|locus:2049359	78.8	1.5e-32	816705	RBGA3	GO:0009651	response to salt stress	biological_process	6
TRINITY_DN32330_c0_g2	TAIR|locus:2049359	78.8	1.5e-32	816705	RBGA3	GO:0009735	response to cytokinin	biological_process	6
TRINITY_DN32330_c0_g2	TAIR|locus:2049359	78.8	1.5e-32	816705	RBGA3	GO:0010043	response to zinc ion	biological_process	7
TRINITY_DN32330_c0_g2	TAIR|locus:2049359	78.8	1.5e-32	816705	RBGA3	GO:0010119	regulation of stomatal movement	biological_process	6
TRINITY_DN32330_c0_g2	TAIR|locus:2049359	78.8	1.5e-32	816705	RBGA3	GO:0010228	vegetative to reproductive phase transition of meristem	biological_process	5
TRINITY_DN32330_c0_g2	TAIR|locus:2049359	78.8	1.5e-32	816705	RBGA3	GO:0010501	RNA secondary structure unwinding	biological_process	9
TRINITY_DN32330_c0_g2	TAIR|locus:2049359	78.8	1.5e-32	816705	RBGA3	GO:0032508	DNA duplex unwinding	biological_process	9
TRINITY_DN32330_c0_g2	TAIR|locus:2049359	78.8	1.5e-32	816705	RBGA3	GO:0045087	innate immune response	biological_process	5
TRINITY_DN32330_c0_g2	TAIR|locus:2049359	78.8	1.5e-32	816705	RBGA3	GO:0046686	response to cadmium ion	biological_process	7
TRINITY_DN32330_c0_g2	TAIR|locus:2049359	78.8	1.5e-32	816705	RBGA3	GO:0048046	apoplast	cellular_component	4
TRINITY_DN32330_c0_g3	TAIR|locus:2049359	81.6	2.3e-36	816705	RBGA3	GO:0000380	alternative mRNA splicing, via spliceosome	biological_process	14
TRINITY_DN32330_c0_g3	TAIR|locus:2049359	81.6	2.3e-36	816705	RBGA3	GO:0003690	double-stranded DNA binding	molecular_function	7
TRINITY_DN32330_c0_g3	TAIR|locus:2049359	81.6	2.3e-36	816705	RBGA3	GO:0003697	single-stranded DNA binding	molecular_function	7
TRINITY_DN32330_c0_g3	TAIR|locus:2049359	81.6	2.3e-36	816705	RBGA3	GO:0003723	RNA binding	molecular_function	6
TRINITY_DN32330_c0_g3	TAIR|locus:2049359	81.6	2.3e-36	816705	RBGA3	GO:0003729	mRNA binding	molecular_function	7
TRINITY_DN32330_c0_g3	TAIR|locus:2049359	81.6	2.3e-36	816705	RBGA3	GO:0005515	protein binding	molecular_function	4
TRINITY_DN32330_c0_g3	TAIR|locus:2049359	81.6	2.3e-36	816705	RBGA3	GO:0005634	nucleus	cellular_component	6
TRINITY_DN32330_c0_g3	TAIR|locus:2049359	81.6	2.3e-36	816705	RBGA3	GO:0005737	cytoplasm	cellular_component	5
TRINITY_DN32330_c0_g3	TAIR|locus:2049359	81.6	2.3e-36	816705	RBGA3	GO:0005739	mitochondrion	cellular_component	6
TRINITY_DN32330_c0_g3	TAIR|locus:2049359	81.6	2.3e-36	816705	RBGA3	GO:0005777	peroxisome	cellular_component	7
TRINITY_DN32330_c0_g3	TAIR|locus:2049359	81.6	2.3e-36	816705	RBGA3	GO:0005829	cytosol	cellular_component	6
TRINITY_DN32330_c0_g3	TAIR|locus:2049359	81.6	2.3e-36	816705	RBGA3	GO:0006406	mRNA export from nucleus	biological_process	11
TRINITY_DN32330_c0_g3	TAIR|locus:2049359	81.6	2.3e-36	816705	RBGA3	GO:0006970	response to osmotic stress	biological_process	5
TRINITY_DN32330_c0_g3	TAIR|locus:2049359	81.6	2.3e-36	816705	RBGA3	GO:0007623	circadian rhythm	biological_process	4
TRINITY_DN32330_c0_g3	TAIR|locus:2049359	81.6	2.3e-36	816705	RBGA3	GO:0009409	response to cold	biological_process	5
TRINITY_DN32330_c0_g3	TAIR|locus:2049359	81.6	2.3e-36	816705	RBGA3	GO:0009414	response to water deprivation	biological_process	5
TRINITY_DN32330_c0_g3	TAIR|locus:2049359	81.6	2.3e-36	816705	RBGA3	GO:0009506	plasmodesma	cellular_component	5
TRINITY_DN32330_c0_g3	TAIR|locus:2049359	81.6	2.3e-36	816705	RBGA3	GO:0009507	chloroplast	cellular_component	7
TRINITY_DN32330_c0_g3	TAIR|locus:2049359	81.6	2.3e-36	816705	RBGA3	GO:0009651	response to salt stress	biological_process	6
TRINITY_DN32330_c0_g3	TAIR|locus:2049359	81.6	2.3e-36	816705	RBGA3	GO:0009735	response to cytokinin	biological_process	6
TRINITY_DN32330_c0_g3	TAIR|locus:2049359	81.6	2.3e-36	816705	RBGA3	GO:0010043	response to zinc ion	biological_process	7
TRINITY_DN32330_c0_g3	TAIR|locus:2049359	81.6	2.3e-36	816705	RBGA3	GO:0010119	regulation of stomatal movement	biological_process	6
TRINITY_DN32330_c0_g3	TAIR|locus:2049359	81.6	2.3e-36	816705	RBGA3	GO:0010228	vegetative to reproductive phase transition of meristem	biological_process	5
TRINITY_DN32330_c0_g3	TAIR|locus:2049359	81.6	2.3e-36	816705	RBGA3	GO:0010501	RNA secondary structure unwinding	biological_process	9
TRINITY_DN32330_c0_g3	TAIR|locus:2049359	81.6	2.3e-36	816705	RBGA3	GO:0032508	DNA duplex unwinding	biological_process	9
[truncated: 45,673 more rows]
